# Supplementary material for: An improved large-scale prediction model of CYP1A2 inhibitors by using combined fragment descriptors
Source: Royal Society of Chemistry journal article supplement (doi:10.1039/c5ra17196b), 2015-01-01
Supplement: c5ra17196b1.xlsx [file c5ra17196b1.xlsx]

## Sheet: Dataset
PubChem SID	SMILES	Dada set	Labels
11110647	Clc1cc3c(cc1)Sc2c(cccc2)C3{E}=CCCN(C)C	training set	inhibitor
11110649	N(CCC=C2c1c(cccc1)C=Cc3c2cccc3)(C)C	training set	non-inhibitor
11110657	o1c(c(nc1CCC(=O)O)-c2ccccc2)-c3ccccc3	training set	non-inhibitor
11110663	O=C(O)CCCCCCCC(=O)O	training set	non-inhibitor
11110664	[nH]1c2c(c(c1)CCN)cccc2	training set	inhibitor
11110668	O(c1c(cc(cc1OC)C(=O)OCCCCCCCCN(CC)CC)OC)C	training set	non-inhibitor
11110669	O=C1N(C(=O)N(c2nc([nH]c21)-c3ccccc3)CC)CC	training set	inhibitor
11110671	S(=O)(=O)(O)c1ccc(cc1)-c2nc3c([nH]2)C(=O)N(C(=O)N3CCC)CCC	training set	non-inhibitor
11110674	Oc1cc2c(cc1)C{S}C3{S}C({S}C2(CCN3CC=C)C)C	training set	non-inhibitor
11110685	O=C(O)C1(N)CCCCC1	training set	non-inhibitor
11110693	O4{R}C(n2c1ncnc(c1nc2)NCCc3ccc(cc3)N){S}C(O){R}C(O){S}C4CO	training set	non-inhibitor
11110696	O4{R}C(n2c1ncnc(c1nc2)NCc3ccc(cc3)N){S}C(O){R}C(O){R}C4C(=O)NC	training set	non-inhibitor
11110697	O=C1NC(=O)Nc2nc3c(nc21)cccc3	training set	inhibitor
11110705	o1nc(c(c1C(C)(C)C)C{S}C(N)c(o)o)O	training set	non-inhibitor
11110709	O=C(N)C	training set	non-inhibitor
11110712	Clc1c(c(cc(c1)N)Cl)N=C2NCCN2	training set	non-inhibitor
11110717	O=C(N{R}C(C(=O)O)CCC(=O)O)c1ccc(cc1)NCc3nc2c(nc(nc2N)N)nc3	training set	non-inhibitor
11110719	Oc1c(cc(cc1)C(=C2C=C(C(=O)C=C2)C(=O)O)c3cc(c(cc3)O)C(=O)O)C(=O)O	training set	inhibitor
11110723	O2{R}C(N1C(=O)NC(=O)C(=C1)C)C{S}C(N=[N+]=[N-]){R}C2CO	training set	non-inhibitor
11110731	O=C(O)C1=CC=C{S}C(C1)N	training set	non-inhibitor
11110732	Clc1c(ccc(c1)CC(=O)OCCN2CCCC2)Cl	training set	inhibitor
11110739	Clc1nc(c(nc1N(C)C)N)C(=O)N=C(N)N	training set	inhibitor
11110741	S(c1n(cnc1[N+](=O)[O-])C)c2ncnc3nc[nH]c32	training set	non-inhibitor
11110751	S(CC[N+](C)(C)C)C(=O)C	training set	non-inhibitor
11110753	S(C(=N)N)CCN	training set	non-inhibitor
11110755	S(P(=O)(O)O)CCNCCCN	training set	non-inhibitor
11110759	O(C(=O)C1=CCCN(C1)C)C	training set	non-inhibitor
11110760	S(=O)(=O)(Nc1cc(ccc1)C(=C2CCCCC2)c3[nH]cnc3)CC	training set	inhibitor
11110766	Fc1ccc(cc1)C(c2ccc(cc2)F)CCCN3CCN(C(=O)NCC)CC3	training set	non-inhibitor
11110770	N=C(N)c1ccc(cc1)N	training set	non-inhibitor
11110773	O=C(O){R}C(N)CCCC(=O)O	training set	non-inhibitor
11110779	O=C(O)CCCCCN	training set	non-inhibitor
11110787	O2{R}C1{R}C(O{S}C({S}C1O)CO)N3C2=NC(=N)C=C3	training set	non-inhibitor
11110793	O3{R}C(n2c1ncnc(c1nc2)N){S}C(O){R}C(O){S}C3CO	training set	non-inhibitor
11110796	Clc1c(ccc(c1)N)N3C(=O)c2c(cccc2)C3=O	training set	non-inhibitor
11110798	Clc1nc(c(nc1N2CCCCCC2)N)C(=O)N=C(N)N	training set	inhibitor
11110804	S1C(=NCC{R}C1C)N	training set	non-inhibitor
11110807	Clc1c(c(cc(c1)CN(CCCl)C)Cl)N=C2NCCN2	training set	non-inhibitor
11110809	BrCC(=O)NC({R}C2C{R}C(NC{R}C(O)COc1c(cccc1)CC=C)(CCC2)C)(C)C	training set	non-inhibitor
11110810	S2c1c(cccc1)O{R}C(C2)CNCCOc3c(cccc3OC)OC	training set	inhibitor
11110815	BrCC(=O)OCC[N+](C)(C)C	training set	non-inhibitor
11110827	Cl{S}C32{R}C({R}C1{R}C({R}C(O)({R}C(C1)C)C(=O)CO)(C{S}C2O)C)CCC4=CC(=O)C=C{S}C43C	training set	non-inhibitor
11110835	O(c1nc(nc2[nH]cnc21)N)Cc3ccccc3	training set	inhibitor
11110836	BrNC(=O)C	training set	non-inhibitor
11110844	S(=O)(=O)(N)c1c(c(cc(c1)C(=O)O)NCCCC)Oc2ccccc2	training set	non-inhibitor
11110846	O=CC[N+](C)(C)C	training set	non-inhibitor
11110852	Clc1cc(ccc1Cl)CC(=O)N3{S}C(CN2CCCC2)CCCC3	training set	non-inhibitor
11110863	O{S}C(C(=O)N{S}C(C(=O)O)CC(C)C){S}C(N)Cc1ccccc1	training set	non-inhibitor
11110872	O1{R}C(C[N+](C)(C)C)CO{S}C1C	training set	non-inhibitor
11110875	O=C1N(C(=O)N(c2nc([nH]c21)C3CCCC3)C)C	training set	inhibitor
11110878	O{R}C(C1CCCCCCC1)CN	training set	non-inhibitor
11110884	O4{R}C(n2c1nc(nc(c1nc2)N)NCCc3ccc(cc3)CCC(=O)O){R}C(O){S}C(O){R}C4C(=O)NCC	training set	non-inhibitor
11110891	Cl{S}C1{R}C(O){S}C(O){S}C(O{S}C1O)CO	training set	non-inhibitor
11110897	ClCCN(c1ccc(cc1)CCCC(=O)O)CCCl	training set	non-inhibitor
11110902	ClCCN(N=O)C(=O)NCCCl	training set	non-inhibitor
11110919	Clc1ccc(cc1)S(=O)(=O)NC(=O)NCCC	training set	non-inhibitor
11110920	Clc1ccc(cc1)Cn2c3c(c(c2C)CC(=O)O)cc(cc3)OC	training set	inhibitor
11110923	[O-][N+](=O)c1c(cc(c(c1)[N+](=O)[O-])C(=O)N)N2CC2	training set	non-inhibitor
11110929	O4c3cc2c1[n+](cc5c(c1ccc2cc3OC4)ccc(c5OC)OC)C	training set	inhibitor
11110936	Clc1ccc(cc1)C{R}C(N)C(=O)OC	training set	inhibitor
11110940	O=C(N2c1c(cccc1)C=Cc3c2cccc3)N	training set	non-inhibitor
11110944	O(CC[N+](C)(C)C)C(=O)N	training set	non-inhibitor
11110946	Clc1cc2c(cc1)OC(=O)N2	training set	inhibitor
11110954	Clc2nc1n(cnc1c(n2)N){R}C3O{S}C({S}C(O){R}C3O)CO	training set	non-inhibitor
11110961	Clc2nc1nc(cc(c1cc2)O)-c3ccccc3	training set	inhibitor
11110966	O3{R}C(n2c1ncnc(c1nc2)N){S}C(O){R}C(O){R}C3C(=O)NC4CC4	training set	non-inhibitor
11110971	Clc1ccc(cc1)OC(C(=O)OCC)(C)C	training set	inhibitor
11110973	Clc3c1n(c(c(n1)-c2ccc(cc2)Cl)CC(=O)N(CCC)CCC)cc(c3)Cl	training set	non-inhibitor
11110981	O1{S}C2{R}C3({R}C({R}C1CC2)(C(=O)OC3=O)C)C	training set	non-inhibitor
11110988	O4{R}C(n2c1ncnc(c1nc2)NC3CCCC3){S}C(O){R}C(O){S}C4CO	training set	non-inhibitor
11110992	Oc1c(ccc(c1)C{Z}=CC(=O)OCCc2ccccc2)O	training set	inhibitor
11110993	S3{S}C1N(C(=O){R}C1NC(=O){S}C(N)C2=CCC=CC2)C(=C(C3)C)C(=O)O	training set	non-inhibitor
11111003	ClC{S}C(N)C(=O)O	training set	non-inhibitor
11111005	ClCC(=O){S}C(NC(=O)OCc1ccccc1)Cc2ccccc2	training set	inhibitor
11111012	Oc1c(cc2c(c1)C{R}C(N)CC2)O	training set	non-inhibitor
11111014	Oc1c-2c(ccc1O)C{S}C4c3c-2cccc3CCN4CCC	training set	inhibitor
11111016	Oc1c-2c(ccc1O)C{R}C4c3c-2cc(cc3CCN4CCC)O	training set	inhibitor
11111020	Oc1cc2c(cc1O)CCNC{S}C2c3ccccc3	training set	non-inhibitor
11111025	Ic1c(cc(c(c1)OC)C{S}C(N)C)OC	training set	inhibitor
11111028	O=C1N(C(=O)N(c2ncn(c21)C)CCC)CCC	training set	inhibitor
11111035	O=C1N(C(=O)N(c2ncn(c21)C)C)CC#C	training set	non-inhibitor
11111039	FC(F){R}C(N)(C(=O)O)CCCN	training set	non-inhibitor
11111043	O{R}C31{R}C({S}C(CC1){R}C2CC(=O)OC2)(C{S}C(O){R}C4{R}C6({R}C(O)(CC{S}C43)C{S}C(O{R}C5O{S}C({S}C(O){R}C(O){R}C5O)C)C{R}C6O)CO)C	training set	non-inhibitor
11111047	[N+](CCCCCCCCCC[N+](C)(C)C)(C)(C)C	training set	non-inhibitor
11111051	O(C(=O){S}C(N)Cc1cc(c(cc1)O)O)C	training set	non-inhibitor
11111055	[n+]1(c2c(c(cc1C)N)cccc2)CCCCCCCCCCCCCC[n+]3c4c(c(cc3C)N)cccc4	training set	non-inhibitor
11111064	[n+]1(c2c(c(cc1C)N)cccc2)CCCCCCCCCC[n+]3c4c(c(cc3C)N)cccc4	training set	non-inhibitor
11111068	O=C4{S}C3({R}C({R}C1{R}C({R}C2(C(=CC1)C{S}C(O)CC2)C)CC3)CC4)C	training set	non-inhibitor
11111075	O=C1N(C(=O)Nc2ncn(c21)C)C	training set	non-inhibitor
11111076	O(C2=C(OC)C(=O)c1c(cccc1)C2=O)C	training set	inhibitor
11111079	[O-][N+]1=CCCC1(C)C	training set	non-inhibitor
11111084	N2(c1ccccc1)CC[N+](CC2)(C)C	training set	non-inhibitor
11111092	O{S}C({R}C(N)CO)CCCCCCCCCCCCCCC	training set	non-inhibitor
11111099	ClC1=C(OC(=O)c2c1cccc2)Cl	training set	inhibitor
11111100	Clc1nnc(cc1)N2C{S}C3N{R}C(C2)CC3	training set	non-inhibitor
11111103	Clc1nc(c(nc1N)N)C(=O)NC(=N)NCc2cc(c(cc2)Cl)Cl	training set	inhibitor
11111108	O=C(N)CNCCC(c1ccccc1)c2ccccc2	training set	non-inhibitor
11111114	O{S}C1{R}C(O){R}C(O)CN{S}C1CO	training set	non-inhibitor
11111120	NCCCCCCCCCCN	training set	non-inhibitor
11111123	O(C(=O)c2ncc1[nH]c3c(c1c2)cccc3)C	training set	inhibitor
11111127	Clc1c(c(c(c(c1)CC)O)C(=O)NC{R}C2CN(CC2)CC)OC	training set	inhibitor
11111129	O{S}C({S}C(n2c1ncnc(c1nc2)N)CCCCCC)C	training set	non-inhibitor
11111136	P(=O)(OC{S}C(OC)COCCCCCCCCCCCCCCCCCC)(OCC[N+](C)(C)C)O	training set	non-inhibitor
11111139	O3{R}C(n2c1ncnc(c1nc2)N){S}C(O){R}C(O){R}C3C(=O)NCC	training set	non-inhibitor
11111141	S(C(=N)N)CC	training set	non-inhibitor
11111145	O2{R}C(C1=NCCN1)(Cc3c2cccc3)CC	training set	non-inhibitor
11111152	O=C1N(C(=O)C=C1)CC	training set	non-inhibitor
11111156	O1{S}C2{S}C({S}C({R}C1CC2)C(=O)O)C(=O)O	training set	non-inhibitor
11111164	S3c1c(cc(cc1)C(F)(F)F)C({E}=CCCN2CCN(CC2)CCO)c4c3cccc4	training set	inhibitor
11111178	Fc1ccc(cc1)C{R}C(N)C(=O)O	training set	non-inhibitor
11111180	S2c1c(cc(cc1)C(F)(F)F)N(c3c2cccc3)CCCN4CCN(CC4)CCO	training set	inhibitor
11111193	O3{S}C1({R}C(O)({R}C2({S}C({S}C(O){S}C1OC(=O)C)C(CC{R}C2O)(C)C)C)C(=O)C{R}C3(C=C)C)C	training set	non-inhibitor
11111196	S(=O)(=O)(F)c1ccc(cc1)C(=O)OCCCN3c2nc([nH]c2C(=O)N(C3=O)CCC)C4CCCC4	training set	non-inhibitor
11111197	S(c1c(cccc1)C(=O)O)CC{E}=C(CCC{E}=C(CCC=C(C)C)C)C	training set	inhibitor
11111204	OC(C1CCN(CC1)CCC{S}C(O)c2ccc(cc2)C(C(=O)O)(C)C)(c3ccccc3)c4ccccc4	training set	non-inhibitor
11111213	S(=O)(=O)(O)CNC(=O)CC{R}C(N)C(=O)O	training set	non-inhibitor
11111216	O4c1c(cc2c(c1)C(=NN{R}C(C2)C)c3ccc(cc3)N)OC4	training set	inhibitor
11111225	O(Cn1c2c(nc1)C(=O)NC(=N2)N)C(CO)CO	training set	non-inhibitor
11111228	O=C4C({Z}=CC){R}C3({R}C({R}C2{S}C({S}C1(C(=CC(=O)CC1)CC2)C)CC3)C4)C	training set	non-inhibitor
11111238	O(c1c(cccc1OCC[N+](CC)(CC)CC)OCC[N+](CC)(CC)CC)CC[N+](CC)(CC)CC	training set	non-inhibitor
11111242	S(=O)(ONCCNC(=N)N)c1c2c(ccc1)cncc2	training set	non-inhibitor
11111247	[Si](O)(c1ccc(cc1)F)(C2CCCCC2)CCCN3CCCCC3	training set	non-inhibitor
11111249	O(c1cc(ccc1O){S}C(O)C(=O)O)C	training set	non-inhibitor
11111257	O(c1c(ccc(c1)CC(=O)O)O)C	training set	non-inhibitor
11111262	n1ncc2c(c1NN)cccc2	training set	inhibitor
11111263	OCc1nc[nH]c1	training set	non-inhibitor
11111271	O1C(=CC(=CC1=O)O)C{Z}=Cc2cc(c(cc2)O)O	training set	non-inhibitor
11111275	n1c(c[nH]c1)CCN	training set	non-inhibitor
11111280	O3{R}C(n2c1nc(nc(c1nc2)N)C#CCCCC){S}C(O){R}C(O){R}C3C(=O)NCC	training set	non-inhibitor
11111282	Oc1c(ccc(c1)CCN)O	training set	non-inhibitor
11111285	Oc2cc1c([nH]cc1CC(=O)O)cc2	training set	non-inhibitor
11111287	Oc1cc(ccc1)CNN	training set	inhibitor
11111292	O=C(NN)c1ccc(cc1)O	training set	non-inhibitor
11111297	Clc1cc(ccc1Cl){S}C3c2c(cccc2){R}C(NC)C3	training set	inhibitor
11111299	Clc1cc(ccc1Cl)CC(=O)N({R}C(c2cc(ccc2)OCC(=O)O)CN3CCCC3)C	training set	non-inhibitor
11111306	N(CCC1C{R}C2C{S}C(C1)CCC2)CCCCCNC	training set	non-inhibitor
11111308	Fc1ccc(cc1)C(OCCCc2nc[nH]c2)c3ccc(cc3)F	training set	inhibitor
11111312	O=C3NN=C(c1ccc(cc1)-n2cncc2)CC3	training set	inhibitor
11111314	S(=O)(=O)(N1CCNCC1)c3c2c(nccc2)ccc3	training set	non-inhibitor
11111318	Clc1c(c(ccc1)Cl)N(C2=NCCN2)Cc3ccc(cc3)F	training set	non-inhibitor
11111321	Oc1c(ccc(c1)O)C(=O)C{Z}=Cc2ccc(cc2)O	training set	inhibitor
11111331	N2(c1c(cccc1)CCc3c2cccc3)CCCN(C)C	training set	non-inhibitor
11111334	O=C(NNC(C)C)c1ccncc1	training set	non-inhibitor
11111337	O=C(O){S}C(N)CCCNC(=N)C	training set	non-inhibitor
11111343	O=C(O)C1CCNCC1	training set	non-inhibitor
11111345	O=C(c1c2c(n(c1C)CCC)cccc2)c3cc4c(cc3)cccc4	training set	inhibitor
11111351	s1c4c(cc1)C(=C2CCN(CC2)C)c3c(cccc3)CC4=O	training set	non-inhibitor
11111356	O=C(NC1C{R}C2N({S}C(C1)CC2)C)c3nn(c4c3cccc4)C	training set	non-inhibitor
11111361	Ic1ccc(cc1)N4CCN(Cc2c3c([nH]c2)nccc3)CC4	training set	inhibitor
11111366	O=C2{S}C(Cc1ccc(cc1){R}C(C(=O)O)C)CCC2	training set	non-inhibitor
11111370	O3C1=C(C(=O)C(=O)c2c1cccc2)CCC3(C)C	training set	inhibitor
11111373	Fc1ccc(cc1)C(=O)C4CCN(CCN3c2c(cccc2)C(C3=O)(C)C)CC4	training set	non-inhibitor
11111376	O(c4cc1c(nc(nc1N)N2C{S}C(N(CC2)C(=O)OCc3ccccc3)C(=O)NC(C)(C)C)cc4OC)C	training set	non-inhibitor
11111383	FC(F)(F)c1ccc(cc1)NC(=O)c2c(onc2)C	training set	inhibitor
11111386	O=C(Nc1c(cccc1C)C)C[N+](CC)(CC)CC	training set	non-inhibitor
11111396	S2C1=N{R}C(CN1CC2)c3ccccc3	training set	non-inhibitor
11111402	O(c1c(cccc1)CNCCCCCCNCCCCCCCCNCCCCCCNCc2c(cccc2)OC)C	training set	non-inhibitor
11111406	Oc2cc1c([nH]cc1C{S}C(N)C)cc2	training set	non-inhibitor
11111411	O(C(=O)NC)CC[N+](C)(C)C	training set	non-inhibitor
11111415	O(c1cc2c(cc1)C{S}C3{S}C4{S}C2(CCN3)CCCC4)C	training set	non-inhibitor
11111419	Fc1ccc(cc1)C(=O)N(c2ncccc2)CCN4CCN(c3c(cccc3)OC)CC4	training set	non-inhibitor
11111423	O(c1c(cccc1C)C)C{S}C(N)C(C)C	training set	inhibitor
11111426	n1[nH]cc(c1)C	training set	non-inhibitor
11111431	Clc1nc(nc(c1NC2=NCCN2)OC)C	training set	non-inhibitor
11111436	O(c2cc1c([nH]cc1CCN(C)C)cc2)C	training set	inhibitor
11111442	O=C(N{R}C(CO)CC){R}C4C=C3c2c1c(c[nH]c1ccc2)C{S}C3N(C4)C	training set	non-inhibitor
11111446	O2{R}C(n1c(c(nc1)C(=O)N)O){R}C(O){S}C(O){S}C2CO	training set	non-inhibitor
11111448	O(c1ccc(cc1)C{Z}=Cc2ccccc2)C[N+](CC)(CC)CC	training set	inhibitor
11111450	O(C(=O){R}C(N)(Cc1ccc(cc1)O)C)C	training set	non-inhibitor
11111458	[O-][n+]1c(nc(cc1N)N2CCCCC2)N	training set	non-inhibitor
11111463	n1(cc(nc1)CCN)C	training set	non-inhibitor
11111465	O(c1c(cc(c(c1)C(C)C)OCCN(C)C)C)C(=O)C	training set	inhibitor
11111473	O3{R}C(n2c1ncnc(c1nc2)NC){S}C(O){R}C(O){S}C3CO	training set	non-inhibitor
11111475	O(c1c(cc(cc1OC){S}C(C(C)C)(CCCN(CCc2cc(c(cc2)OC)OC)C)C#N)OC)C	training set	non-inhibitor
11111476	N1=C(NCC1)C{Z}=Cc2c(cccc2)C	training set	inhibitor
11111484	O(c2cc1c([nH]cc1CCN)cc2)C	training set	inhibitor
11111486	O(C(=O)N{S}C(C(=O)N{S}C(Cc1ccccc1)C=O)C(C)C)Cc2ccccc2	training set	non-inhibitor
11111491	o1c3c(c2c1cccc2)CCN4{S}C3C{R}C5(CC4)N(C(=O)N(CC5)C)C	training set	non-inhibitor
11111495	n1(cncc1)C	training set	non-inhibitor
11111497	s1c(ccc1)CN(c2ncccc2)CCN(C)C	training set	non-inhibitor
11111501	O{R}C21{S}C({R}C(C(=C(C1=O)C(=O)N)O)C(C)C)C{R}C4C(=C2O)C(=O)c3c(c(ccc3O)N(C)C)C4	training set	non-inhibitor
11111504	O4{R}C6{R}C31{R}C(O)({S}C(N(CC1)CC2CC2)Cc5c3c4c(cc5)O)Cc7c6[nH]c8c7cccc8	training set	non-inhibitor
11111510	O{R}C(c1ccc(cc1)O){S}C(N{S}C(CCc2ccccc2)C)C	training set	inhibitor
11111513	O3{S}C5{S}C21{S}C(O)({R}C(N(CC1)CC=C)Cc4c2c3c(cc4)O)CCC5{E}=NNC(=O)c6ccccc6	training set	non-inhibitor
11111514	FC(F)(F)c1cc2c(cc1)N(C(=O)N2)c3c(ccc(c3)C(F)(F)F)O	training set	inhibitor
11111519	FC(F)(F)c1cc(ccc1)Nc2ncccc2C(=O)O	training set	inhibitor
11111528	O(c1cc(ccc1)[N+](C)(C)C)C(=O)N(C)C	training set	non-inhibitor
11111530	S(c1ncnc2n(cnc21){R}C3O{S}C({S}C(O){R}C3O)CO)Cc4ccc(cc4)[N+](=O)[O-]	training set	non-inhibitor
11111543	N1=C(NCC1)Cc2cc3c(cc2)cccc3	training set	non-inhibitor
11111545	O(C(=O){R}C(N)CCCNC(=N)N[N+](=O)[O-])C	training set	non-inhibitor
11111550	O3{S}C5{S}C21{S}C(O)({R}C(N(CC1)CC=C)Cc4c2c3c(cc4)O)CCC5=O	training set	non-inhibitor
11111553	O=C(c1c2c(ccc1)cccc2)CC[N+](C)(C)C	training set	inhibitor
11111557	ClCCN(N=O)C(=O)NCc1c(nc(nc1)C)N	training set	non-inhibitor
11111571	Oc1c(cc(c(c1C)CC2=NCCN2)C)C(C)(C)C	training set	non-inhibitor
11111574	O{R}C31{R}C({S}C(CC1)C2=CC(=O)OC2)(C{S}C(O){R}C4{R}C6({R}C(O)(CC{S}C43)C{S}C(O{R}C5O{S}C({S}C(O){R}C(O){R}C5O)C)C{R}C6O)CO)C	training set	non-inhibitor
11111582	Oc1cc(ccc1){R}C2CN(CCC2)CCC	training set	non-inhibitor
11111584	NCC#Cc1ccccc1	training set	inhibitor
11111602	O5CCN(C({E}=NC21CC3CC(C1)CC(C2)C3)NC4CCCCC4)CC5	training set	non-inhibitor
11111606	O1{R}C3({R}C1{R}C2OC(=O)C(=C){R}C2CCC({Z}=CCC3)C)C	training set	non-inhibitor
11111612	o1[n+](c(c(n1)-c2ccccc2)C#N)[O-]	training set	inhibitor
11111616	O=C1N(C(=O)c2c1cccc2){S}C(C(=O)O)CCC(=O)O	training set	non-inhibitor
11111626	s1c(ncc1)NC(=S)Nc2ccccc2	training set	inhibitor
11111631	O4{R}C(n2c1ncnc(c1nc2)N{S}C(Cc3ccccc3)C){S}C(O){R}C(O){S}C4CO	training set	non-inhibitor
11111642	S1(=O)(=O)N(C(=C(O)c2c1cccc2)C(=O)Nc3ncccc3)C	training set	non-inhibitor
11111648	n21nnnc1CCCCC2	training set	non-inhibitor
11111652	S2c1c(cccc1)N(c3c2cccc3)CCCN(C)C	training set	inhibitor
11111656	O=C(O)C1=CC{S}C(CC1)C(=C)C	training set	non-inhibitor
11111661	O=C(N2c1c(cccc1)C(=O)Nc3c2nccc3)CN4CCN(CC4)C	training set	non-inhibitor
11111664	S2c1c(cc(cc1)C(=O)CC)N(c3c2cccc3)CCCN(C)C	training set	inhibitor
11111669	N(Cc1ccccc1)(CC#C)C	training set	non-inhibitor
11111671	S(CCc1cc(ccc1)CCSC(=N)N)C(=N)N	training set	non-inhibitor
11111672	O=C(O)CCc1c5[nH]c(c1C)cc2nc(c(c2C=C)C)cc3[nH]c(c(c3C=C)C)cc4nc(c(c4C)CCC(=O)O)c5	training set	inhibitor
11111678	O=C(O){R}C1NCCC{R}C1C(=O)O	training set	non-inhibitor
11111681	O=C2Nc1c(cccc1)-c3c2cccc3	training set	inhibitor
11111684	S(=O)(=O)(O)C1CCNCC1	training set	non-inhibitor
11111686	Clc1cc3c(cc1)Sc2c(cccc2)N3CCCN4CCN(CC4)C	training set	inhibitor
11111691	O=C(NCCN(CC)CC)c1ccc(cc1)N	training set	non-inhibitor
11111694	O(c1c[n+](ccc1)C)C(=O)N(C)C	training set	non-inhibitor
11111695	O4c2c(c(c1c(occ1)c2)OCCCCc3ccccc3)C=CC4=O	training set	inhibitor
11111703	N3({R}C2{R}C(Cc1nc(ncc1C2)N)CCC3)CCC	training set	non-inhibitor
11111713	Clc1c3c(ccc1)NC2=NC(=O){R}C(N2C3)C	training set	inhibitor
11111715	S(Cc1oc(cc1)CN(C)C)CCNC({E}=C[N+](=O)[O-])NC	training set	non-inhibitor
11111720	s1c(c(nc1)C(=O)NCCN)-c2cc(ccc2)F	training set	inhibitor
11111721	Fc1c(cccc1)C(=O)c2cc(c(c(c2)O)O)[N+](=O)[O-]	training set	non-inhibitor
11111727	O1C(=NCC1)NC(C2CC2)C3CC3	training set	non-inhibitor
11111734	s1c(c(c2c1cc(cc2)O)C(=O)c3ccc(cc3)OCCN4CCCCC4)-c5ccc(cc5)O	training set	non-inhibitor
11111741	O=C2Nc1c(c(ccc1)CCN(CCC)CCC)C2	training set	non-inhibitor
11111744	O(c1cc(ccc1){S}C(O)CCCCC)Cc2nc3c(cc2)cccc3	training set	inhibitor
11111751	Fc1ccc(cc1)C2=CCN(CC2)C{R}C(O)COc3ccc(cc3)C(=O)N	training set	non-inhibitor
11111754	N3(c1c2c(ccc1)cccc2)CCNCC3	training set	inhibitor
11111755	O(c1c(cccc1)N2CCNCC2)C	training set	non-inhibitor
11111759	Clc1c3c(cc(c1O)O){S}C(c2ccccc2)CNCC3	training set	non-inhibitor
11111762	O=C1NC(=NC2=C1N=C(CN2)C(=O){S}C(O)C)N	training set	non-inhibitor
11111765	Clc1cc(c(cc1N)OC)C(=O)OCCN(CC)CC	training set	inhibitor
11111767	O6c1c(cc2c(c1)CCN2C(=O)c3ccc(cc3)-c4c(cc(cc4)-c5nc(on5)C)C)C7(C6)CCN(CC7)C	training set	non-inhibitor
11111776	Clc1cc2c(cc1C)CCN2C(=O)Nc3c4c(ncc3)cccc4	training set	inhibitor
11111777	O=C1N{S}C(C(=O)N{S}C(C(=O)N{S}C(C(=O)N({S}C(C(=O)N{S}C(C(=O)N{S}C1Cc2c3c([nH]c2)cccc3)Cc4ccc(cc4)O)C)C)Cc5ccccc5)C(C)C)CCCCN	training set	non-inhibitor
11111780	Clc1c2c(ccc1)CCN(CC2)C	training set	non-inhibitor
11111783	Clc1ccc(cc1)-c2n(nc(c2)C(F)(F)F)-c3ccc(cc3)OC	training set	inhibitor
11111786	O({R}C(C[N+](C)(C)C)CC(=O)O)C(=O)CCCCCCCCCCCCCCCCC	training set	non-inhibitor
11111789	O(c1cc(ccc1){R}C(N2{R}C(CN({R}C(C2)C)CC=C)C)c3ccc(cc3)C(=O)N(CC)CC)C	training set	non-inhibitor
11111791	N(CCCCNCCCN)CCCN	training set	non-inhibitor
11111794	s1c3c(cc1){S}C(c2cc(c(cc2)O)O)CNC3	training set	non-inhibitor
11111798	S({R}C5{R}C3{R}C2{R}C({R}C1(OC(=O)CC1)CC2)(CC{S}C3{S}C4(C(=CC(=O)CC4)C5)C)C)C(=O)C	training set	non-inhibitor
11111801	S1N(C(=NC1{E}=NC)c2ccccc2)c3ccccc3	training set	inhibitor
11111812	O=C(N1{S}C(C(=O)O)CCC1)CCC(=O)O	training set	non-inhibitor
11111816	Fc1ccc(cc1)C(=O)CCCN4CCC3(N(c2ccccc2)CNC3=O)CC4	training set	non-inhibitor
11111820	O(c1c(ccc(c1)CCn2cncc2)OC)CCCc3ccc(cc3)OC	training set	inhibitor
11111825	O(C(=O)CCC(=O)OCC[N+](C)(C)C)CC[N+](C)(C)C	training set	non-inhibitor
11111835	S(=O)(=O)(N(C)C)c1cc2c(cc1)NC(=O)C2{Z}=Cc3[nH]c4c(c3)CCCC4	training set	inhibitor
11111838	FC(F)(F)c1cc(ccc1)C2(O)CCN(CC2)CCCC(=O)c3ccc(cc3)F	training set	non-inhibitor
11111842	O(C1C{R}C2[N+]({S}C(C1)CC2)(C)C)C(=O)c3c4c([nH]c3)cccc4	training set	non-inhibitor
11111847	O=C(N{S}C4C{S}C3c2c1c(c[nH]c1ccc2)C{S}C3N(C4)C)N(CC)CC	training set	non-inhibitor
11111849	Oc1c(cc(cc1C(C)(C)C)C=C(C#N)C#N)C(C)(C)C	training set	inhibitor
11111850	P(=O)(O)(C1=CCNCC1)C	training set	non-inhibitor
11111854	S(=O)(=O)(c1cc(c(cc1)OC)C(=O)NCCN(CC)CC)C	training set	non-inhibitor
11111858	S(=O)(=O)(NC(=O)NCCCC)c1ccc(cc1)C	training set	non-inhibitor
11111862	P(=O)(OP(=O)(NC(C)C)NC(C)C)(NC(C)C)NC(C)C	training set	non-inhibitor
11111865	S(CC(=O)O)CCCCCCCCCCCCCC	training set	non-inhibitor
11111867	S=C(N)C({E}=Cc1cc(c(c(c1)C(C)(C)C)O)C(C)(C)C)C#N	training set	inhibitor
11111868	[N+](CC)(CC)(CC)CC	training set	non-inhibitor
11111872	Oc1ccc(cc1)CCN	training set	non-inhibitor
11111879	n1c3c(nc(c1-c2ccccc2)N)nc(nc3N)N	training set	inhibitor
11111884	O=C1NC(=NC2=C1N{S}C(CN2){R}C(O){S}C(O)C)N	training set	non-inhibitor
11111890	O=C(N2c1c(cccc1)CC2){R}C(Cc3cc(c(cc3)O)O)C#N	training set	inhibitor
11111892	Oc1cc(ccc1O)C{E}=C(C(=O)NCCCNC(=O)C({E}=Cc2cc(c(cc2)O)O)C#N)C#N	training set	non-inhibitor
11111895	O=C(C({E}=Cc1c2c([nH]c1)cccc2)C#N)c3cc(c(cc3)O)O	training set	inhibitor
11111899	Clc1c(cccc1){R}C(O)CNC(C)(C)C	training set	non-inhibitor
11111905	O(c1ccc(cc1)C{Z}=Cc2ccccc2)C{S}C([N+](C)(C)C)C	training set	non-inhibitor
11111908	Oc1ccc(cc1)C{Z}=C(C(=C(C#N)C#N)N)C#N	training set	inhibitor
11111911	S(C(=N)Nc1ccc(cc1)C(F)(F)F)CC	training set	inhibitor
11111913	Oc1c(cc(cc1O)C=C(C#N)C#N)O	training set	non-inhibitor
11111932	S1{S}C(C(=C(C1=O)C)O)(C{E}=C(C=C)C)C	training set	non-inhibitor
11111938	O4{R}C3(C{R}C(N1CCCC1){R}C(N(C(=O)Cc2ccccc2)C)CC3)CCC4	training set	non-inhibitor
11111945	O(c1c(cc2c(c1)CC(N(CCC)CCC)C2)OC)C	training set	non-inhibitor
11111949	O2c1c(c(c(c(c1C)C)O)C)CC{S}C2(CN6CCN(c3nc(nc(c3)N4CCCC4)N5CCCC5)CC6)C	training set	non-inhibitor
11111951	O=C(O)C{Z}=Cc1nc[nH]c1	training set	non-inhibitor
11111953	O({R}C8{R}C(O)({S}C6N(c1c(cc(c(c1)OC){R}C3(c2[nH]c5c(c2CCN4C{S}C(C3)C{S}C(O)(C4)CC)cccc5)C(=O)OC){R}C76{R}C9N(CC7)CC=C{R}C98CC)C)C(=O)OC)C(=O)C	training set	non-inhibitor
11111954	Brc1cc2c(cc1)CCN2C{S}C(N)C	training set	inhibitor
11111958	Clc1c7ccc(c1){R}C({S}C%10C(=O)N{S}C(c2c(c(cc(c2)O)O)-c3cc(ccc3O){R}C(NC(=O){R}C5NC(=O){R}C(NC(=O){S}C({S}C(c4cc(c(cc4)Oc6c(c(cc5c6)O7)O{S}C8O{S}C({S}C(O){R}C(O){R}C8O{S}C9O{S}C({S}C(O){S}C(N)(C9)C)C)CO)Cl)O)NC(=O){S}C(NC)CC(C)C)CC(=O)N)C(=O)N%10)C(=O)O)O	training set	non-inhibitor
11111961	O(c1c(ccc(c1)CNC(=O)CCCCCCCC)O)C	training set	inhibitor
11111963	O=C1N(C{R}C(N)C(=O)O)C=CC(=O)N1	training set	non-inhibitor
11111968	O=C1N(C(=O)c3c2c1cccc2ccc3)CCC[N+](CCCCCC[N+](CCCN6C(=O)c5c4c(cccc4ccc5)C6=O)(C)C)(C)C	training set	non-inhibitor
11111971	S1C(=NCCC1)Nc2c(cccc2C)C	training set	non-inhibitor
11111976	O(c1c(ccc(c1)CCN(CCc2cc(c(cc2)OC)OC)C)OC)C	training set	non-inhibitor
11111980	O=C1N=C(Nc2[nH]nnc21)c3c(cccc3)OCCC	training set	inhibitor
11111986	BrC(Br)(P(=O)(OP(=O)(OC{S}C3O{R}C(n2c1ncnc(c1nc2)N(CC)CC){S}C(O){R}C3O)O)O)P(=O)(O)O	training set	non-inhibitor
11111992	S(=O)(=O)(O)CCCN	training set	non-inhibitor
11111995	Brc2n(c1ncnc(c1n2)N){R}C4O{S}C3{R}C(OP(=O)(OC3)O){R}C4O	training set	non-inhibitor
11111998	Brc1c(cccc1)C[N+](CC)(C)C	training set	non-inhibitor
11112000	FC(F)(F)c1nc(n(c1)C)-c2ccc(cc2)OC{S}C(O)CNCCOc3cc(c(cc3)O)C(=O)N	training set	non-inhibitor
11112002	O({S}C(NC(=O)CCCCCCCCCCCCC){S}C(O)C{Z}=CCCCCCCCCCCCCCCC)C	training set	non-inhibitor
11112004	Clc1ccc(cc1)Sc3n(c2ncnc(c2n3)N){R}C5O{S}C4{R}C(OP(=O)(OC4)O){R}C5O	training set	non-inhibitor
11112010	Clc1cc(ccc1){R}C(O)CN{S}C(Cc2cc3c(cc2)OC(O3)(c(o)o)c(o)o)C	training set	non-inhibitor
11112015	Oc1cc2c(cc1)C{S}C3{S}C4{S}C2(CCN3C)CCCC4	training set	non-inhibitor
11112020	ClC(Cl)(P(=O)(O)O)P(=O)(O)O	training set	non-inhibitor
11112022	S(=O)(=O)(O{R}C2CC1=CC{R}C3{S}C({S}C1(CC2)C)CC{R}C4({R}C3CCC4=O)C)O	training set	non-inhibitor
11112027	O({R}C4C({Z}=C(c(o)o)CCC=C(C)C){S}C3{R}C({S}C1({S}C({S}C2({S}C(CC1){S}C({R}C(O)CC2)C)C){R}C(O)C3)C)(C4)C)C(=O)C	training set	non-inhibitor
11112029	O4{R}C6{R}C31{R}C(O)({S}C(N(CC1)CC2CC2)Cc5c3c4c(cc5)O)Cc7c6[nH]c8c7cc(cc8)NC(=N)N	training set	non-inhibitor
11112032	O{R}C4({R}C3({R}C({S}C2{S}C({S}C1(C(=CC(=O)CC1)CC2)C){R}C(O)C3)CC4)C)C(=O)COC(=O)CCc(o)o	training set	non-inhibitor
11112034	Oc1c(ccc(c1){R}C(O)CNC(C)C)O	training set	non-inhibitor
11112043	Oc1cc2c(cc1)C{S}C3{S}C4{S}C2(CCN3CC=C)CCCC4	training set	non-inhibitor
11112050	Clc1c(c(ccc1C)Cl)Nc2c(cccc2)-c(o)o	training set	non-inhibitor
11112054	O4{R}C6{R}C31{R}C(O)({S}C(N(CC1)CC2CC2)Cc5c3c4c(cc5)O)Cc7c6oc8c7cccc8	training set	non-inhibitor
11112057	O{S}C2c1c(cccc1)CCC{S}C2Cc(o)o	training set	non-inhibitor
11112061	P(=O)(O{S}C1{S}C(O{S}C({R}C1O)COP(=O)(OP(=O)(OC{S}C3O{R}C(N2C=C(CC=C2)C(=O)N){S}C(O){R}C3O)O)O)n5c4ncnc(c4nc5)N)(O)O	training set	non-inhibitor
11112064	oc(o)C(=O)N	training set	non-inhibitor
11112068	O=C(N{R}C(c(o)o)CCc(o)o)c1c(cccc1)-c(o)o	training set	non-inhibitor
11112073	oc(o)C(CCC)CCC	training set	non-inhibitor
11112079	Clc1c(c(c(c(c1)Cl)O)C(=O)NC{R}C2N(CCC2)CC)OC	training set	inhibitor
11112080	P(=O)(O{S}C1O{S}C({S}C(O){R}C(O){R}C1O)C)(O)N{S}C(C(=O)N{S}C(Cc2c3c([nH]c2)cccc3)c(o)o)CC(C)C	training set	non-inhibitor
11112086	SC(=S)O{R}C2{S}C1{R}C3{R}C({S}C(C1)C2)CCC3	training set	non-inhibitor
11112089	Clc1cc(ccc1Cl)CC(=O)N({R}C4{R}C(N2CCCC2)C{R}C3(OCCC3)CC4)C	training set	non-inhibitor
11112091	P(=O)(OC{S}C2O{R}C(N1C(=O)NC(=O)C=C1){S}C(O){R}C2O)(OP(=O)(O)O)O	training set	non-inhibitor
11112093	S(=O)(=O)(N)Cc1noc2c1cccc2	training set	non-inhibitor
11112095	O{S}C3CC({Z}=CC{E}=C2{S}C1{S}C({S}C(CC1){S}C(C{Z}=C{S}C(C(C)C)C)C)(CCC2)C)C(=C)CC3	training set	non-inhibitor
11112097	O{R}C4({R}C3({R}C({S}C2{S}C({S}C1(C(=CC(=O)CC1)CC2)C){R}C(O)C3)CC4)C)C(=O)CO	training set	non-inhibitor
11112099	O{S}C4{R}C3({R}C({R}C2{S}C(c1c(cc(cc1)O)CC2)CC3)C{R}C4O)C	training set	non-inhibitor
11112105	Clc2cc1nccc(c1cc2)N{S}C(CCCN(CC)CC)C	training set	non-inhibitor
11112108	ON{Z}=Cc1[n+](cccc1)C	training set	non-inhibitor
11112112	O(C1C{R}C2N({S}C(C1)CC2)C)C(=O){S}C(O)c3ccccc3	training set	non-inhibitor
11112114	ClC(Cl)(Cl){R}C(P(=O)(OC)OC)O	training set	non-inhibitor
11112117	O{R}C4({R}C3({R}C({S}C2{S}C({S}C1(C(=CC(=O)C=C1)CC2)C)C(=O)C3)CC4)C)C(=O)CO	training set	non-inhibitor
11112122	O=C4{S}C3({S}C({S}C1{R}C({S}C2({S}C(CC1)C{S}C(O)CC2)C)CC3)CC4)C	training set	non-inhibitor
11112127	IC2=CN({S}C1O{S}C({S}C(O)C1)CO)C(=O)NC2=O	training set	non-inhibitor
11112132	Oc1ccc(cc1)C({Z}=C(c2ccc(cc2)O)CC)CC	training set	inhibitor
11112133	ClC(Cl)C(=O)N{S}C({S}C(O)c1ccc(cc1)[N+](=O)[O-])CO	training set	non-inhibitor
11112135	S(=O)(=O)(N(CCC)CCC)c1ccc(cc1)C(=O)O	training set	non-inhibitor
11112137	O=C({R}C4{R}C3({R}C({S}C2{S}C({S}C1(C(=CC(=O)CC1)CC2)C)CC3)CC4)C)C	training set	non-inhibitor
11112139	S(=O)(CCC1C(=O)N(N(C1=O)c2ccccc2)c3ccccc3)c4ccccc4	training set	non-inhibitor
11112143	S2c1c(cccc1)N(c3c2cccc3)C{S}C(N(C)C)C	training set	inhibitor
11112145	Oc1c(c(cnc1C)CO)CO	training set	non-inhibitor
11112147	S2{R}C({S}C1NC(=O)N{S}C1C2)CCCCC(=O)O	training set	non-inhibitor
11112150	O=C1N=C(Nc2ncc(nc21)CNc3ccc(cc3)C(=O)N{S}C(C(=O)O)CCC(=O)O)N	training set	non-inhibitor
11112155	Oc1c(ccc(c1)C{S}C(N)C(=O)O)O	training set	non-inhibitor
11112158	Sc1n(ccn1)C	training set	non-inhibitor
11112160	P2(=O)(O{R}C1{S}C(O){R}C(O{S}C1CO2)n4c3ncnc(c3nc4)N)O	training set	non-inhibitor
11112162	s1c(ncc1[N+](=O)[O-])N2C(=O)NCC2	training set	inhibitor
11112164	O=C(NCC(=O)O)c1ccc(cc1)N	training set	non-inhibitor
11112165	Clc2cc1nc(oc1cc2)N	training set	inhibitor
11112168	[N+]3(CCC(=C(c1ccccc1)c2ccccc2)CC3)(C)C	training set	non-inhibitor
11112169	O(c2cc(c1ncccc1c2)N{S}C(CCCN)C)C	training set	inhibitor
11112172	O(c1cc2c(cc1)N({R}C3{R}C2(CCN3C)C)C)C(=O)NC	training set	non-inhibitor
11112174	Clc1c3c(c(cc1)O)C(=O)C2=C(O){R}C4(O){S}C(C{S}C2{R}C3(O)C){S}C(N(C)C)C(=C(C4=O)C(=O)N)O	training set	non-inhibitor
11112176	O{R}C21{S}C({R}C(N(C)C)C(=C(C1=O)C(=O)N)O)C{S}C4C(=C2O)C(=O)c3c(cccc3O){S}C4(O)C	training set	non-inhibitor
11112178	O(c1c2c(cc(c1OC)OC)CC{R}C(C3=CC(=O)C(=CC=C32)OC)NC(=O)C)C	training set	non-inhibitor
11112183	O{R}C31{S}C({R}C(CC1)C2=CC(=O)OC2)(CC{S}C4{R}C5({S}C(O)(CC{R}C43)C{R}C(O)CC5)C=O)C	training set	non-inhibitor
11112189	O{S}C3CC({Z}=CC{E}=C2{S}C1{S}C({S}C(CC1){S}C(CCCC(C)C)C)(CCC2)C)C(=C)CC3	training set	non-inhibitor
11112193	S(=O)(=O)(Nc1ncccn1)c2ccc(cc2)N	training set	non-inhibitor
11112196	FC(F)(F)C2=CN({S}C1O{S}C({S}C(O)C1)CO)C(=O)NC2=O	training set	non-inhibitor
11112198	S(=O)(=O)(Nc1sccn1)c2ccc(cc2)N	training set	non-inhibitor
11112199	O{R}C4({S}C3({R}C({S}C2{R}C(c1c(cc(cc1)OC)CC2)CC3)CC4)C)C#C	training set	inhibitor
11112202	Clc1c(cc2c(c1)N{R}C(NC2=O)CC)S(=O)(=O)N	training set	non-inhibitor
11112204	O=C1NC=CC(=O)C1(CC)CC	training set	non-inhibitor
11112206	Clc1c(cc(cc1){S}C2(O)NC(=O)c3c2cccc3)S(=O)(=O)N	training set	non-inhibitor
11112208	O5{R}C4{S}C({S}C3({S}C({R}C1{R}C({R}C2({R}C(CC1)C{S}C(O)CC2)C)CC3)C4)C){S}C({R}C65NC{S}C(CC6)C)C	training set	non-inhibitor
11112210	O(C{S}C(COC(=O)N)(CCC)C)C(=O)NC(C)C	training set	non-inhibitor
11112212	Clc1nnc(cc1)NS(=O)(=O)c2ccc(cc2)N	training set	non-inhibitor
11112214	Clc1ccc(cc1){R}C2S(=O)(=O)CCC(=O)N2C	training set	non-inhibitor
11112217	O=C1N(N(C(=C1N)C)C)c2ccccc2	training set	non-inhibitor
11112220	O{S}C2CC1=CC{R}C3{S}C({R}C1(CC2)C)CC{S}C4({R}C3CC{S}C4{S}C(CC{R}C(C(C)C)CC)C)C	training set	non-inhibitor
11112221	O=C2NC(=O)N=C3N(c1c(cc(c(c1)C)C)N=C32)C{R}C(O){R}C(O){S}C(O)CO	training set	inhibitor
11112227	S(=O)(=O)(Nc1sccn1)c2ccc(cc2)NC(=O)c3c(cccc3)C(=O)O	training set	non-inhibitor
11112228	O(c1nc2c(c(c1)C(=O)NCCN(CC)CC)cccc2)CCCC	training set	inhibitor
11112230	O=C1N(C(=O)N{S}C1c2ccccc2)CC	training set	non-inhibitor
11112232	O2{R}C1{S}C(OC{S}C1O[N+](=O)[O-]){S}C(O[N+](=O)[O-])C2	training set	non-inhibitor
11112235	Oc1c(cc(cc1)N)C(=O)O	training set	non-inhibitor
11112238	Clc1c(cc2c(c1)N=C(NS2(=O)=O)CSCc3ccccc3)S(=O)(=O)N	training set	non-inhibitor
11112239	O(c1cc2c(cc1)NC(C=C2C)(C)C)CC	training set	inhibitor
11112245	O(C(=O)c1ccc(cc1)N)CCCC	training set	inhibitor
11112247	O3c1c(ccc(c1)C{Z}=CC{Z}=CC(=O)N2CCCCC2)OC3	training set	inhibitor
11112248	O({R}C1O{S}C({S}C(O){R}C(O){S}C1O)CO){S}C({R}C(O){S}C(O)C(=O)O){S}C(O)CO	training set	non-inhibitor
11112252	O(c1ccc(cc1)O)Cc2ccccc2	training set	inhibitor
11112254	O(C(=O)c1ccc(cc1)NCCCC)CCOCCOCCOCCOCCOCCOCCOCCOCCOC	training set	non-inhibitor
11112256	Clc1ccc(cc1){R}C(c2ncccc2)CCN(C)C	training set	non-inhibitor
11112258	OC(C1CCNCC1)(c2ccccc2)c3ccccc3	training set	non-inhibitor
11112261	O{S}C({S}C1N2C{R}C({R}C(C1)CC2)C=C)c3c4c(ncc3)cccc4	training set	non-inhibitor
11112264	Clc1c(cc(cc1Cl)S(=O)(=O)N)S(=O)(=O)N	training set	non-inhibitor
11112268	S(=O)(=O)(Nc1nc(nc(c1)OC)OC)c2ccc(cc2)N	training set	non-inhibitor
11112270	O=C1NCNC(=O)C1(c2ccccc2)CC	training set	non-inhibitor
11112272	O=C1NC(=O)CC{S}C1(c2ccc(cc2)N)CC	training set	non-inhibitor
11112275	O=C(N(C(Cc1ccccc1)(C)C)C)CN(CC(=O)N(C(Cc2ccccc2)(C)C)C)CCO	training set	non-inhibitor
11112278	S(=O)(=O)(NC(=O)c1ccccc1)c2ccc(cc2)N	training set	non-inhibitor
11112281	O{S}C3{R}C2{R}C1{R}C({R}C(CC1){R}C(CCC(=O)O)C)(CC{S}C2{R}C4({R}C(C3)C{S}C(O)CC4)C)C	training set	non-inhibitor
11112286	S2c1c(cc(cc1)SC)N(c3c2cccc3)CC{R}C4N(CCCC4)C	training set	inhibitor
11112288	O=C(c1c(cc(cc1)OC)O)c2ccccc2	training set	inhibitor
11112289	O(C(c1ccccc1)c2ccccc2)C3CCN(CC3)C	training set	non-inhibitor
11112292	Clc1c(cc2c(c1)N{R}C(NS2(=O)=O)C(Cl)Cl)S(=O)(=O)N	training set	non-inhibitor
11112296	n1c(c(ccc1N)N{Z}=Nc2ccccc2)N	training set	inhibitor
11112297	S(=O)(=O)(N)c1ccc(cc1)CN	training set	non-inhibitor
11112299	O1{S}C43{S}C2({S}C({R}C1(O){S}C(OC(=O){R}C(O)(CC)C)CC2){S}C(OC(=O)C){S}C(OC(=O)C){S}C3{S}C5(O){S}C(C4){R}C6{S}C({R}C(O){R}C5OC(=O){S}C(CC)C){S}C(O)({R}C7N(C6)C{S}C(CC7)C)C)C	training set	non-inhibitor
11112301	S(=O)(=O)(Nc1sc(nn1)C)c2ccc(cc2)N	training set	non-inhibitor
11112303	O=C({S}C4{S}C3({R}C({R}C1{S}C({R}C2(C(=CC1)C{S}C(O)CC2)C)CC3)CC4)C)C	training set	non-inhibitor
11112308	O1C(=O)C(=C(O)c2c1cccc2){R}C(c3ccc(cc3)[N+](=O)[O-])CC(=O)C	training set	non-inhibitor
11112311	O{S}C(c1ccccc1){S}C(N)C	training set	non-inhibitor
11112313	O3c2c(c1occc1cc2C=CC3=O)OC	training set	inhibitor
11112314	N1(CCCC1)CC#CCN2CCCC2	training set	non-inhibitor
11112316	N3(C(c1ccccc1)c2ccccc2)CCN(CC3)C	training set	non-inhibitor
11112321	O4{R}C(O)(c1ccc(cc1)-c2ccc(cc2){R}C3(OCC[N+](C3)(C)C)O)C[N+](CC4)(C)C	training set	non-inhibitor
11112323	O(c1cc2c(cc1OC)CCN3{R}C2C{S}C({S}C(C3)CC)C{R}C4NCCc5c4cc(c(c5)OC)OC)C	training set	non-inhibitor
11112328	FC(F)(F)c1cc(c(cc1)C(=O)O)OC(=O)C	training set	non-inhibitor
11112330	F{S}C32{R}C({R}C1{S}C({R}C(O)(CC1)C(=O)COC(=O)C)(C{S}C2O)C)CCC4=CC(=O)C=C{S}C43C	training set	non-inhibitor
11112333	F{S}C43{R}C({S}C2{S}C({S}C1(OC(O{R}C1C2)(C)C)C(=O)COC(=O)C)(C{R}C3O)C)C{S}C(F)C5=CC(=O)C=C{R}C54C	training set	non-inhibitor
11112335	O=C(NC(C)C)c1ccc(cc1)CNNC	training set	inhibitor
11112337	O=C3{S}C2{S}C1(C(=CC(=O)CC1)CC{S}C2{R}C4{R}C(C3)(C(=O)CC4)C)C	training set	non-inhibitor
11112340	ClC1=C{R}C4{S}C({S}C2(C1=CC(=O){S}C3{S}C2C3)C)CC{R}C5({R}C4CC{R}C5(OC(=O)C)C(=O)C)C	training set	non-inhibitor
11112342	O{S}C4C{S}C3{R}C({S}C2{S}C({R}C1{S}C({R}C(CC1){R}C(CCC(=O)O)C)(CC2)C)CC3)(CC4)C	training set	non-inhibitor
11112344	O{S}C31{R}C({R}C(CC1)C2=COC(=O)C=C2)(CC{R}C4{S}C3CCC5=C{S}C(CC{R}C54C)O{S}C6O{S}C({S}C(O){R}C(O){S}C6O)C)C	training set	non-inhibitor
11112346	O=C(O){S}C54{S}C({S}C3{R}C({S}C2({S}C({R}C1({R}C(C({R}C(O)CC1)(C)C)CC2)C)CC3)C)(CC4)C){S}C(CC5)C(=C)C	training set	non-inhibitor
11112349	O{R}C3{R}C4({S}C({R}C1{R}C({R}C2({R}C(C{S}C1O)C{S}C(O)CC2)C)C3)CC{R}C4{R}C(CCC(=O)NCC(=O)O)C)C	training set	non-inhibitor
11112352	O(c1c-3c2c(cc1O)CCN({S}C2Cc4c-3cc(c(c4)O)OC)C)C	training set	inhibitor
11112355	O2c1c(c(cc(c1)O)O)C(=O)C{S}C2c3ccc(cc3)O	training set	inhibitor
11112357	O3{R}C1{R}C2N(CC1)CC=C2COC(=O){R}C(O)({S}C(CC({E}=CC)C3=O)C)CO	training set	non-inhibitor
11112360	O=C(N(c1c(cccc1)C)CC)C{Z}=CC	training set	non-inhibitor
11112363	O4c1c(ccc(c1)C3=CC(=O)c2c(cccc2)N3C)OC4	training set	inhibitor
11112364	O=C2N({R}C(c1cnccc1)CC2)C	training set	non-inhibitor
11112370	OC1=CN(C=CC1=O)C{R}C(N)C(=O)O	training set	non-inhibitor
11112373	O1{R}C(CC(=CC1=O)OC)C{Z}=Cc2ccccc2	training set	inhibitor
11112374	O3{R}C4{S}C6({R}C1{R}C2({S}C({R}C({S}C1N(C2)C)C3)C4)C=C)c5c(cccc5)NC6=O	training set	non-inhibitor
11112377	F{S}C32{R}C({R}C1{S}C({R}C(O)(CC1)C(=O)COC(=O)C)(C{S}C2O)C)CCC4=CC(=O)CC{S}C43C	training set	non-inhibitor
11112379	O4C(=O){R}C3{S}C(c1c(cc2c(c1)OCO2){S}C(O){S}C3C4)c5cc(c(c(c5)OC)OC)OC	training set	non-inhibitor
11112383	O4c1c(c(cc(c1)O{R}C2O{S}C({S}C(O){R}C(O){S}C2O)CO{S}C3O{S}C({S}C(O){R}C(O){S}C3O)C)O)C(=O)C{S}C4c5cc(c(cc5)OC)O	training set	non-inhibitor
11112384	O2c1c(c(cc(c1)O)O)C(=O)C{S}C2c3cc(c(cc3)OC)O	training set	inhibitor
11112388	N1=C(NCC1){S}C3c2c(cccc2)CCC3	training set	non-inhibitor
11112395	FC(F)(F)c1cc(ccc1)Nc2c(cccc2)C(=O)O	training set	inhibitor
11112396	O({R}C1O{S}C({S}C(O){R}C(O){S}C1O)CO)c2c(cc3c(c2)C=CC(=O)O3)O	training set	non-inhibitor
11112404	O({S}C1CC(N({R}C(C1)C)C)(C)C)C(=O){S}C(O)c2ccccc2	training set	non-inhibitor
11112407	N5(C{R}C43{R}C({R}C1{R}C({R}C2(C(=CC1)C{S}C(N(C)C)CC2)C)CC3)CC{S}C4{R}C5C)C	training set	non-inhibitor
11112408	O(C(=O){R}C(c1ccccc1)C2CCCCC2)CCN(CC)CC	training set	inhibitor
11112411	N1=C(NCC1)Cc2c3c(ccc2)cccc3	training set	non-inhibitor
11112414	O(c1c(cc(cc1OC)C(=O)NCc2ccc(cc2)OCCN(C)C)OC)C	training set	non-inhibitor
11112416	ClC(=C(c1ccc(cc1)OC)c2ccc(cc2)OC)c3ccc(cc3)OC	training set	non-inhibitor
11112417	O{R}C(c1ccc(cc1)O){S}C(N{S}C(COc2ccccc2)C)C	training set	inhibitor
11112419	O({S}C(C[N+](C)(C)C)C)C(=O)N	training set	non-inhibitor
11112421	O({R}C4({R}C3({R}C({R}C2{S}C({S}C1(C(=CC(=O)CC1)C(=C2)C)C)CC3)CC4)C)C(=O)C)C(=O)C	training set	non-inhibitor
11112423	S(=O)(=O)(Nc1ncccc1)c2ccc(cc2)N{Z}=Nc3cc(c(cc3)O)C(=O)O	training set	non-inhibitor
11112426	O=C1N(C(=O)N(c2ncn(c21)C{S}C(O)C)C)C	training set	non-inhibitor
11112428	Ic1c(c(cc(c1NC(=O)CCCCC(=O)Nc2c(c(c(cc2I)I)C(=O)O)I)I)I)C(=O)O	training set	non-inhibitor
11112430	Clc1cc3c(cc1)Sc2c(cccc2)C3{E}=CCCN4CCN(CC4)CCO	training set	inhibitor
11112432	Clc1c(cc(cc1)C(=O)NN2{R}C(CCC{S}C2C)C)S(=O)(=O)N	training set	non-inhibitor
11112436	O1C(=O)C{R}C(O)(CC1)C	training set	non-inhibitor
11112438	S(=O)(=O)(Nc1noc(c1)C)c2ccc(cc2)N	training set	non-inhibitor
11112440	O{R}C1{S}C({R}C(C(=O)C1)CCCCCCC(=O)O)C{Z}=C{S}C(O)CCCCC	training set	non-inhibitor
11112443	O{R}C(c1ccc(cc1)O)CN	training set	non-inhibitor
11112444	O2c1c(cccc1)C=C(NC(=O)C)C2=O	training set	inhibitor
11112446	N({R}C1(C({S}C2C{S}C1CC2)(C)C)C)C	training set	non-inhibitor
11112448	N(C(=N)NCCc1ccccc1)C(=N)N	training set	non-inhibitor
11112450	S({R}C1O{S}C({S}C(O){R}C(O){S}C1O){S}C(NC(=O){R}C2N(C{S}C(C2)CCC)C){S}C(O)C)C	training set	non-inhibitor
11112452	Clc1ccc(cc1)OC(C(=O)O)(C)C	training set	non-inhibitor
11112455	O=C1NC(=O)NN=C1C	training set	non-inhibitor
11112457	S2{S}C1N(C(=O){R}C1N)C(=C(C2)COC(=O)C)C(=O)O	training set	non-inhibitor
11112461	Brc1ccc(cc1){R}C(c2ncccc2)CCN(C)C	training set	non-inhibitor
11112464	O=C(O){S}C(NC(=O)C)CC(=O)O	training set	non-inhibitor
11112466	S2(=O)(=O)c1c(cc(c(c1)S(=O)(=O)N)C)CCC2	training set	non-inhibitor
11112467	S2c1c(cccc1)N(c3c2cccc3)C{S}C(N(CC)CC)C	training set	inhibitor
11112471	F{S}C32{R}C({R}C1{S}C({R}C(O)({R}C(C1)C)C(=O)COC(=O)C)(C{S}C2O)C)CCC4=CC(=O)C=C{S}C43C	training set	non-inhibitor
11112473	S1C(=O){R}C(NC(=O)C)CC1	training set	non-inhibitor
11112475	N(C(Cc1ccccc1)(C)C)C	training set	non-inhibitor
11112478	O{R}C({R}C1{S}C2C{S}C(C1)C=C2)(c3ccccc3)CCN4CCCCC4	training set	non-inhibitor
11112480	O=C(N{S}C1C(=O)N{R}C(C(=O)N{R}C(C(=O)NC{S}C(C(=O)N{R}C(C(=O)N{R}C(C(=O)N{R}C(C(=O)NCC1){S}C(O)C)CCN)CCN)C(C)C)CC(C)C)CCN){S}C(NC(=O){R}C(NC(=O){S}C(NC(=O)CCCCC(C)C)CCN){S}C(O)C)CCN	training set	non-inhibitor
11112482	O1{R}C3(O)C{R}C(O){R}C({S}C1C{S}C(O{S}C2O{S}C({S}C(O){R}C(N){S}C2O)C)C{Z}=CC=CC{Z}=CC=CC{Z}=CC=CC{Z}=C{S}C({S}C(O){S}C({S}C(OC(=O)C{R}C(O)C{R}C(O)CC{S}C(O){R}C(O)C{S}C(O)C3)C)C)C)C(=O)O	training set	non-inhibitor
11112485	Clc1c7ccc(c1){R}C({S}C%10C(=O)N{S}C(c2c(c(cc(c2)O)O)-c3cc(ccc3O){R}C(NC(=O){S}C5NC(=O){R}C(NC(=O){S}C({S}C(c4cc(c(cc4)Oc6c(c(cc5c6)O7)O{R}C8O{S}C({S}C(O){R}C(O){S}C8O{R}C9O{S}C({S}C(O){S}C(N)(C9)C)C)CO)Cl)O)NC(=O){S}C(NC)CC(C)C)CC(=O)N)C(=O)N%10)C(=O)O)O	training set	non-inhibitor
11112487	S4C(=N{R}C(C(=O)N{S}C(C(=O)N{S}C(C(=O)N{R}C(C(=O)N{S}C1C(=O)N{R}C(C(=O)N{R}C(C(=O)N{R}C(C(=O)N{R}C(C(=O)N{R}C(C(=O)N{R}C(C(=O)NCCCC1)CC(=O)N)CC(=O)O)Cc2[nH]cnc2)Cc3ccccc3){S}C(CC)C)CCCN){S}C(CC)C)CCC(=O)O)CC(C)C)C4){S}C(N){S}C(CC)C	training set	non-inhibitor
11112488	O{S}C(c1ccccc1)(C2CCCCC2)C(=O)OCC#CCN(CC)CC	training set	inhibitor
11112491	F{S}C5C1=CC(=O)CC{R}C1({R}C4{R}C({S}C3{S}C({S}C2(OC(O{R}C2C3)(C)C)C(=O)CO)(C{R}C4O)C)C5)C	training set	non-inhibitor
11112494	O{R}C5(n1c3c(c2c1cccc2)CCN4{R}C3{R}C(CCC4)(C5)CC)C(=O)OC	training set	non-inhibitor
11112497	O{S}C31{S}C({R}C(CC1)C2=CC(=O)OC2)({R}C(O)C{S}C4{S}C3CC{S}C5{R}C4(CC{S}C(O)C5)C)C	training set	non-inhibitor
11112499	O(c1cc2c(cc1OC)CCN({S}C2Cc3cc(c(cc3)OC)OC)C)C	training set	non-inhibitor
11112503	Clc1ccc(cc1){S}C(N2CCN(CCC2)C)c3ccccc3	training set	non-inhibitor
11112506	Clc1ccc(cc1)N3C2=CC({E}=NC(C)C)C(=CC2=Nc4c3cccc4)Nc5ccc(cc5)Cl	training set	non-inhibitor
11112509	S(SC{S}C1OCCC1)C({E}=C(N(Cc2c(nc(nc2)C)N)C=O)C)CCO	training set	non-inhibitor
11112511	O=C1N(N(C(=C1NC(=O)c2cnccc2)C)C)c3ccccc3	training set	non-inhibitor
11112514	Clc1ccc(cc1){S}C(N2CCN(CC2)CCOCCO)c3ccccc3	training set	non-inhibitor
11112515	S1{S}C5{R}C1C{R}C4{R}C({S}C3{R}C({R}C2{R}C({R}C(O)CC2)(CC3)C)CC4)(C5)C	training set	inhibitor
11112517	O(c1ccc(cc1)CC(=O)NO)CCCC	training set	inhibitor
11112519	N(c1ccccc1)(CC2=NCCN2)Cc3ccccc3	training set	non-inhibitor
11112522	O{R}C4{S}C2{S}C1(C(=CC(=O)CC1){S}C(C{S}C2{R}C3{R}C({R}C(CC3)C(=O)C)(C4)C)C)C	training set	non-inhibitor
11112525	O(c1c(cc2c(c1){S}C(NCC2)C)OC)C	training set	non-inhibitor
11112526	O(c1c(cc(cc1)OC){S}C(O)CNC(=O)CN)C	training set	inhibitor
11112529	O1CCN(C(=N)NC(=N)N)CC1	training set	non-inhibitor
11112532	S(=O)(=O)(N)c1c(cccc1)N	training set	non-inhibitor
11112536	S1{R}C2N({S}C(C1(C)C)C(=O)O)C(=O){R}C2NC(=O)C3(N)CCCCC3	training set	non-inhibitor
11112538	O(c4c1c(cc-2[n+](c1)CCc3c-2cc(c(c3)OC)OC)ccc4OC)C	training set	non-inhibitor
11112540	O(c2cc1c3c([nH]c1cc2)C(=NCC3)C)C	training set	inhibitor
11112544	ClC(Cl)C(=O)N(c1ccc(cc1)OC(=O)c2occc2)C	training set	non-inhibitor
11112546	ClCCN1P(=O)(OCCC1)NCCCl	training set	non-inhibitor
11112547	O(C(=O)NNc1nncc2c1cccc2)CC	training set	inhibitor
11112550	o2c1c(c3c(cc1cc2C)C(=CC(=O)O3)C)C	training set	inhibitor
11112552	O{R}C41{R}C({S}C(O){R}C3C(=C1O)C(=O)c2c(cccc2O)C3=C){S}C(N(C)C)C(=C(C4=O)C(=O)N)O	training set	non-inhibitor
11112555	O5{S}C({R}C1{S}C(C{S}C2N(C1)CCc3c2[nH]c4c3cccc4)C(=C5)C(=O)OC)C	training set	inhibitor
11112557	O(C1C{R}C2[N+]([O-])({S}C(C1)CC2)C)C(=O){R}C(c3ccccc3)CO	training set	non-inhibitor
11112560	O{S}C4{S}C21{S}C6{S}C5({R}C3{S}C1N(C{R}C({R}C2C3)(CC4)C)CC){S}C(O)C(=C){S}C(C5){R}C(O)C6	training set	non-inhibitor
11112563	O3{S}C(O{S}C1{S}C(NC(=N)N){R}C(O){S}C(NC(=N)N){S}C(O){S}C1O){R}C(O{S}C2O{R}C({S}C(O){R}C(O){S}C2NC)CO){R}C(O)({S}C3C)CO	training set	non-inhibitor
11112565	S3{S}C1N(C(=O){R}C1NC(=O)Cc2sccc2)C(=C(C3)C[n+]4ccc(cc4)C(=O)N)c(o)o	training set	non-inhibitor
11112567	O3{S}C21{R}C4N({R}C(C1)C=CC2=CC3=O)CCCC4	training set	non-inhibitor
11112569	OC2({S}C(c1ccccc1)C(=O)OCCN(C)C)CCCC2	training set	non-inhibitor
11112571	O{S}C1{R}C2N({R}C(C1)CC(=O)C2)C	training set	non-inhibitor
11112575	O(c1c(ccc(c1)C(=O)OCCN(CC)CC)N)CCCC	training set	inhibitor
11112576	P(=O)(Oc1c(cccc1)C(=O)O)(O)O	training set	non-inhibitor
11112579	O=C1C{R}C2N({S}C(C1)CCC2)C	training set	non-inhibitor
11112583	O(c1c(cccc1)OCC=C)C{R}C(O)CNC(C)C	training set	inhibitor
11112584	O=C(N(CCC)CCC){R}C(NC(=O)c1ccccc1)CCC(=O)O	training set	non-inhibitor
11112587	O=C2{S}C1C4=C({R}C1C=C2OC)c3c(cc(c(c3OC)OC)OC)CC{R}C4NC(=O)C	training set	non-inhibitor
11112590	S(=O)(=O)(Oc1cc4c(cc1){S}C3{R}C({R}C2{R}C(C(=O)CC2)(CC3)C)CC4)O	training set	non-inhibitor
11112592	O{R}C42{S}C6{R}C1N(C{R}C5({R}C({S}C1({S}C3{S}C2{S}C(OC(=O)C){S}C(C3){R}C(OC)C4){S}C(O)CC5)C6)COC)CC	training set	non-inhibitor
11112594	O1{R}C4(O)C{R}C(O){R}C({S}C1C{S}C(O{S}C2O{S}C({S}C(O){R}C(N){S}C2O)C)C{Z}=CC{Z}=CC=CC{Z}=CC{S}C(OC(=O)C{Z}=C{R}C3O{R}C3C{S}C(O)C4)C)C(=O)O	training set	non-inhibitor
11112596	O2c1c(c(c(c(c1C)C)O)C)CC{R}C2(CCC{S}C(CCC{S}C(CCCC(C)C)C)C)C	training set	non-inhibitor
11112601	O{R}C41{R}C({S}C(O){R}C3C(=C1O)C(=O)c2c(cccc2O){S}C3C){S}C(N(C)C)C(=C(C4=O)C(=O)N)O	training set	non-inhibitor
11112604	O({S}C3{S}C51{R}C6N2{S}C({R}C1{R}C(C2)(C{S}C3OC(=O)c4ccccc4)C)C{S}C87{R}C5{R}C(OC(=O)C){R}C({S}C(O){R}C76)C(=C)C8)C(=O)C	training set	non-inhibitor
11112605	O(c1c(c(ccc1CN2CCNCC2)OC)OC)C	training set	inhibitor
11112607	O4c1c5c2c(c(c1C)O)c(c(c(c2O)C{Z}=NN3CCN(CC3)C)NC(=O)C({Z}=CC{Z}=C{S}C({S}C(O){S}C({S}C(O){S}C({S}C(OC(=O)C){R}C({R}C(OC)C{Z}=CO{R}C4(C5=O)C)C)C)C)C)C)O	training set	non-inhibitor
11112610	O{R}C21{S}C({R}C(N(C)C)C(=C(C1=O)C(=O)N)O)C{R}C4C(=C2O)C(=O)c3c(c(ccc3O)N(C)C)C4	training set	non-inhibitor
11112612	O(c1c(cccc1)CC=C)C{R}C(O)CNC(C)C	training set	inhibitor
11112614	O(C(=O)Nc1nc2c([nH]1)ccc(c2)CCCC)C	training set	inhibitor
11112617	Oc1c(ccc(c1O)O)CNNC(=O){S}C(N)CO	training set	non-inhibitor
11112621	O1{R}C54{R}C3({R}C2({R}C1OC(=O){R}C2O){S}C(C{R}C3OC4=O)C(C)(C)C)C{R}C6OC(=O){S}C({R}C65O)C	training set	non-inhibitor
11112624	O({S}C5{S}C4({S}C({R}C1{R}C({R}C3({R}C(CC1)C{S}C(OC(=O)C){R}C([N+]2(CCCCC2)C)C3)C)CC4)C{R}C5[N+]6(CCCCC6)C)C)C(=O)C	training set	non-inhibitor
11112627	{R}S(=O)(=N)(CC{R}C(N)C(=O)O)C	training set	non-inhibitor
11112629	O{S}C(c1cc(cc(c1)O)O)CN{S}C(Cc2ccc(cc2)O)C	training set	non-inhibitor
11112633	O(C(=O){R}C52{R}C(C1=CC{S}C3{S}C({S}C1(CC2)C)(CC{R}C4{R}C3(C{R}C({S}C({S}C4(CO)C)O)O)C)C){R}C({R}C(CC5)C)C){R}C6O{S}C({S}C(O){R}C(O){S}C6O)CO{S}C8O{S}C({S}C(O{R}C7O{S}C({S}C(O){R}C(O){S}C7O)C){S}C(O){S}C8O)CO	training set	non-inhibitor
11112635	O{R}C5({S}C4({R}C({S}C3{R}C({R}C2(C(=Cc1oncc1C2)CC3)C)CC4)CC5)C)C#C	training set	inhibitor
11112636	Clc1c(cc2c(c1)N{R}C(N(C2=O)c3c(cccc3)C)C)S(=O)(=O)N	training set	non-inhibitor
11112638	O4{S}C53{S}C2({R}C(O)({S}C1{S}C({R}C(OC1=O){S}C2OC3=O)C(=C)C)C{R}C54)C	training set	non-inhibitor
11112642	O=C(Nc1c(cccc1C)C){S}C2N(CCCC2)CCCC	training set	inhibitor
11112645	O{R}C(c1cc(c(cc1)O)CO)CNC(C)(C)C	training set	non-inhibitor
11112649	O(c4cc1c(nc(nc1N)N3CCN(C(=O)c2occc2)CC3)cc4OC)C	training set	non-inhibitor
11112652	O1{R}C4{S}C3(c2c1c(ccc2CN(CC3)C)OC)C=C{R}C(O)C4	training set	non-inhibitor
11112656	O(c1c(cc(cc1OC)C{Z}=CC(=O)N2C(=O)C=CCC2)OC)C	training set	inhibitor
11112660	O{S}C31{S}C({R}C(CC1)C2=CC(=O)OC2)({R}C(O)C{R}C4{R}C3CC{S}C8{R}C4(CC{S}C(O{S}C7O{S}C({S}C(O{R}C6O{S}C({S}C(O{R}C5O{S}C({S}C(O){S}C(O)C5)C){S}C(O)C6)C){S}C(O)C7)C)C8)C)C	training set	non-inhibitor
11112662	Cl{S}C({S}C(NC(=O){R}C1N(C{S}C(C1)CCC)C){R}C2O{S}C(SC){S}C(O){S}C(O){S}C2O)C	training set	non-inhibitor
11112666	Clc1c(c(cc(c1){R}C(O)CNC(C)(C)C)Cl)N	training set	non-inhibitor
11112668	O1C2(OC{R}C1CNC(=N)N)CCCCC2	training set	non-inhibitor
11112673	O3{R}C5{S}C(c1c(cc2c(c1)OCO2)C3=O){R}C4N(CCC4=C{S}C5O)C	training set	non-inhibitor
11112675	Fc1c(ccc(c1)F)-c2cc(c(cc2)O)C(=O)O	training set	non-inhibitor
11112678	O({R}C1{S}C(NC{S}C1O)Cc2ccc(cc2)OC)C(=O)C	training set	non-inhibitor
11112681	O2c1nc3c(c(c1C{S}C2{S}C(O)(CO)C)OC)cccc3	training set	inhibitor
11112682	O{R}C(c1cc(cc(c1)O)O)CNC(C)(C)C	training set	non-inhibitor
11112684	S2(=O)(=O)C{S}C(N(N{Z}=Cc1oc(cc1)[N+](=O)[O-])CC2)C	training set	non-inhibitor
11112686	O4{R}C6{R}C31{R}C(O)({S}C(N(CC1)CC2CCC2)Cc5c3c4c(cc5)O)CC{S}C6O	training set	non-inhibitor
11112688	O2{R}C(c1c(cccc1)CN(CC2)C)c3ccccc3	training set	non-inhibitor
11112692	O=C3{R}C1{S}C4({S}C(CC{R}C1{S}C2{R}C({R}C(CC2)C(=O)C)(C3)C)C{S}C(O)CC4)C	training set	non-inhibitor
11112695	Clc1c(ccc(c1)Cl){R}C(OCc2ccc(cc2)Cl)Cn3cncc3	training set	inhibitor
11112699	ClCC(=O){S}C4(OC(=O)CC){S}C3({R}C({R}C2{S}C(F)({R}C1(C(=CC(=O)C=C1)CC2)C){S}C(O)C3)C{S}C4C)C	training set	non-inhibitor
11112702	O({R}C4c1c(c(c3c(c1O)C(=O)c2c(cccc2OC)C3=O)O)C{R}C(O)(C4)C(=O)CO){S}C5O{S}C({S}C(O){S}C(N)C5)C	training set	non-inhibitor
11112707	O=C(N{S}C({R}C(O)CC(=O)N{S}C(C(=O)N{S}C({R}C(O)CC(=O)O)CC(C)C)C)CC(C)C){S}C(NC(=O){S}C(NC(=O)CC(C)C)C(C)C)C(C)C	training set	non-inhibitor
11112709	s1nc(c(n1)OC{S}C(O)CNC(C)(C)C)N2CCOCC2	training set	non-inhibitor
11112711	Clc1c(ccc(c1)Cl){R}C(OCc2c(cccc2Cl)Cl)Cn3cncc3	training set	inhibitor
11112713	O(c1c2c(ccc1)C(=O)CCC2)C{S}C(O)CNC(C)(C)C	training set	non-inhibitor
11112715	O2{S}C(N1C(=O)NC(=O)C(=C1)C)C{S}C(N=[N+]=N){R}C2CO	training set	non-inhibitor
11112718	O=C(c2cc1nc([nH]c1cc2)NC(=O)OC)c3ccccc3	training set	inhibitor
11112719	Clc1cc(ccc1)C(=O){S}C(NC(C)(C)C)C	training set	non-inhibitor
11112722	Oc1c(cc(cc1){R}C(O)CN{S}C(CCc2ccccc2)C)C(=O)N	training set	non-inhibitor
11112726	O({R}C2{S}C(O){R}C(O{S}C1O{S}C({S}C(O)C{R}C1N)CN){R}C(N)C{S}C2N){R}C3O{R}C({S}C(O){S}C(N){S}C3O)CO	training set	non-inhibitor
11112729	O(C(=O)c1n(cnc1){S}C(c2ccccc2)C)CC	training set	inhibitor
11112730	S1{R}C({R}C(OC(=O)C)C(=O)N(c2c1cccc2)CCN(C)C)c3ccc(cc3)OC	training set	non-inhibitor
11112732	O=C1N(C(=O)CC2(C1)CCCC2)CCCCN4CCN(c3ncccn3)CC4	training set	non-inhibitor
11112735	S1{R}C2N({S}C(C1(C)C)C(=O)OCOC(=O)C(C)(C)C)C(=O){R}C2NC(=O){S}C(N)c3ccccc3	training set	non-inhibitor
11112738	O(c1c(cccc1)C(=O)CCc2ccccc2)C{S}C(O)CNCCC	training set	inhibitor
11112739	O(c1c(cc(cc1)NC(=O)CCC)C(=O)C)C{S}C(O)CNC(C)C	training set	non-inhibitor
11112741	S1(=O)(=O)N(C(=C(O)c2c1cccc2)C(=O)Nc3noc(c3)C)C	training set	non-inhibitor
11112743	O(c1c(c(cc(c1)OC)OC)C(=O)CCCN2CCCC2)C	training set	non-inhibitor
11112748	O3{S}C2{S}C(O{S}C(O{R}C1{S}C(O){R}C(O){R}C(N)C{S}C1N){R}C(N)C2){S}C(O){S}C(NC){S}C3O{S}C4O{S}C({S}C(N){S}C(O){S}C4O)CO	training set	non-inhibitor
11112751	O=C(N{R}C4C{S}C3c2c1c(c[nH]c1ccc2)C{S}C3N(C4)C)N(CC)CC	training set	non-inhibitor
11112753	Oc1c(cc2c(c1){S}C(NCC2)C)O	training set	non-inhibitor
11112756	O=C1NC(=O)N({R}C1NC(=O)NCNC(=O)N{R}C2N(C(=O)NC2=O)CO)CO	training set	non-inhibitor
11112759	s1c(ccc1)C(=O)c2ccc(cc2){R}C(C(=O)O)C	training set	non-inhibitor
11112762	NC21C{S}C3(C{S}C(C1)(CC(C2)C3)C)C	training set	non-inhibitor
11112764	Clc1ccc(cc1)C(=O)NCCc2ccc(cc2)OC(C(=O)O)(C)C	training set	non-inhibitor
11112767	O(c2cc1c(cc(cc1)CCC(=O)C)cc2)C	training set	inhibitor
11112768	O(C(=O)C1=C{R}C4({R}C3c2n1c5c(c2CCN3CCC4)cccc5)CC)CC	training set	non-inhibitor
11112771	Oc1c(ccc(c1)CCN{S}C(CCc2ccc(cc2)O)C)O	training set	non-inhibitor
11112774	O({S}C2{R}C(O{R}C1O{S}C({S}C(O){S}C(O){S}C1N)CN){R}C(N)C{S}C(NC(=O){S}C(O)CCN){R}C2O){R}C3O{S}C({S}C(O){S}C3O)CO	training set	non-inhibitor
11112776	O5{R}C4({R}C3({R}C({R}C2{S}C({S}C1(C(=CC(=O)C=C1)CC2)C){R}C(O)C3)C{R}C4O{R}C5CCC)C)C(=O)CO	training set	non-inhibitor
11112779	O(c1c2c(ccc1)NC(=O)CC2)C{S}C(O)CNC(C)(C)C	training set	non-inhibitor
11112781	ClC1(Cl){S}C(C1)c2ccc(cc2)OC(C(=O)O)(C)C	training set	non-inhibitor
11112783	O({S}C2{R}C(O){S}C(O{S}C1OC(=CC{R}C1N)CN){S}C(N)C{R}C2N){R}C3OC{S}C(O)({S}C(NC){S}C3O)C	training set	non-inhibitor
11112786	Clc1c(cccc1)CN3Cc2c(scc2)CC3	training set	inhibitor
11112790	S(c2cc1nc([nH]c1cc2)NC(=O)OC)CCC	training set	inhibitor
11112792	S(=O)(=O)(N)c1c(c(cc(c1)C(=O)O)N2CCCC2)Oc3ccccc3	training set	non-inhibitor
11112796	O({S}C2{R}C(O){S}C(O{S}C1OC(=CC{R}C1N)CN){S}C(N)C{R}C2NCC){R}C3OC{S}C(O)({S}C(NC){S}C3O)C	training set	non-inhibitor
11112800	O{R}C(c1ccccc1)(C2CCCCC2)CCN3CCCCC3	training set	non-inhibitor
11112802	Oc1cc(ccc1){R}C2(CN(CCCC2)C)CC	training set	non-inhibitor
11112805	O=C1N({S}C({S}C(O){S}C(CC{Z}=CC)C)C(=O)N{S}C(C(=O)N(CC(=O)N({S}C(C(=O)N{S}C(C(=O)N({S}C(C(=O)N{S}C(C(=O)N{S}C(C(=O)N({S}C(C(=O)N({S}C(C(=O)N({S}C1C(C)C)C)CC(C)C)C)CC(C)C)C)C)C)CC(C)C)C)C(C)C)CC(C)C)C)C)CC)C	training set	non-inhibitor
11112807	Ic1c(c(c(c(c1C(=O)NC(CO)CO)I)NC(=O){S}C(O)C)I)C(=O)NC(CO)CO	training set	non-inhibitor
11112809	O2{S}C1{S}C(O{R}C({R}C1OCCCN(C)C){R}C(O)CO)OC2(C)C	training set	non-inhibitor
11112811	O=C2NC=C(c1ccncc1)C=C2N	training set	inhibitor
11112815	O3{R}C4{R}C(O)({S}C(OC(=O){R}C({R}C(O{S}C1O{S}C({R}C(O){S}C(OC)(C1)C)C){S}C({S}C(O{S}C2O{S}C(C{R}C(N(C)C){S}C2O)C){R}C(O)(C{S}C({S}C(N{S}C3COCCOC){R}C4C)C)C)C)C)CC)C	training set	non-inhibitor
11112817	O=C(Nc1c(cccc1CC)CC)CN(CC(=O)O)CC(=O)O	training set	non-inhibitor
11112820	O1O{R}C4(O{R}C2OC(=O){R}C({R}C3{S}C21{R}C({S}C(CC3)C)CC4)C)C	training set	inhibitor
11112821	O(c1c(ccc(c1){R}C(O)CNC)OC(=O)C(C)(C)C)C(=O)C(C)(C)C	training set	non-inhibitor
11112824	Clc2cc1nccc(c1cc2)Nc3c(cccc3)C(=O)OC{S}C(O)CO	training set	inhibitor
11112827	Clc1c(ccc(c1)Cl){S}C2(O{R}C(CO2)COc3ccc(cc3)N4CCN(CC4)C(C)C)Cn5ncnc5	training set	non-inhibitor
11112831	Fc1c(cc2c(c1)C(=O)C(=CN2CC)C(=O)O)N3CCNCC3	training set	non-inhibitor
11112834	O5c1c6c2c(c(c1C)O)C(=O)C(=C3C2=NC4(N3)CCN(CC4)CC(C)C)NC(=O)C({Z}=CC{Z}=C{R}C({R}C(O){R}C({R}C(O){R}C({R}C(OC(=O)C){S}C({S}C(OC)C{Z}=CO{R}C5(C6=O)C)C)C)C)C)C	training set	non-inhibitor
11112837	ClC(Cl)C(=O)N{R}C({S}C(O)c1ccc(cc1)S(=O)(=O)C)CF	training set	non-inhibitor
11112839	S(=O)(c1cc(c(cc1)-c3nc2ncccc2[nH]3)OC)C	training set	inhibitor
11112841	O({R}C4({R}C3({R}C({S}C2{S}C({S}C1(C(=CC(=O)C=C1)CC2)C){R}C(O)C3)CC4)C)C(=O)COC(=O)CC)C(=O)OCC	training set	non-inhibitor
11112843	S(C2=C(N1{S}C({R}C(C1=O){S}C(O)C)C2)C(=O)O)CCNC=N	training set	non-inhibitor
11112847	O=C(N1{S}C(CCC1)C(=O)O){S}C(N{S}C(C(=O)OCC)CCc2ccccc2)C	training set	non-inhibitor
11112849	s1c(nc(c1)CSCCNC({E}=C[N+](=O)[O-])NC)CN(C)C	training set	non-inhibitor
11112854	S3{S}C1N(C(=O){R}C1NC(=O)C({Z}=NOCC(=O)O)c2nc(sc2)N)C(=C(C3)C=C)C(=O)O	training set	non-inhibitor
11112856	O({R}C2{R}C1{R}C({S}C(C=CC1=C{S}C(C2)C)C)CC{S}C3OC(=O)C{R}C(O)C3)C(=O)C(CC)(C)C	training set	non-inhibitor
11112858	O({S}C2{R}C(O)(C{S}C(C({Z}=NOCOCCOC){S}C({S}C(O){S}C(O)({S}C(OC(=O){R}C({R}C(O{S}C1O{S}C({R}C(O){S}C(OC)(C1)C)C){S}C2C)C)CC)C)C)C)C){S}C3O{S}C(C{R}C(N(C)C){S}C3O)C	training set	non-inhibitor
11112860	Clc1cc(c(cc1N)OC)C(=O)N{S}C2{R}C(OC)CN(CC2)CCCOc3ccc(cc3)F	training set	non-inhibitor
11112863	O(c1cc(cc(c1)OC(=O)N(C)C){R}C(O)CNC(C)(C)C)C(=O)N(C)C	training set	non-inhibitor
11112865	Clc1ccc(cc1){S}C(N2CCN(CC2)CCOCC(=O)O)c3ccccc3	training set	non-inhibitor
11112870	N3({R}C2{R}C(Cc1n[nH]cc1C2)CCC3)CCC	training set	non-inhibitor
11112872	Ic1c(c(c(c(c1C(=O)NC{R}C(O)CO)I)C(=O)NC{R}C(O)CO)I)N(C(=O)CO)CCO	training set	non-inhibitor
11112874	Ic1c(c(c(c(c1C(=O)NC{R}C(O)CO)I)C(=O)NC{R}C(O)CO)I)N(CC(O)CN(c2c(c(c(c(c2I)C(=O)NC{R}C(O)CO)I)C(=O)NC{R}C(O)CO)I)C(=O)C)C(=O)C	training set	non-inhibitor
11112878	S(C2=C(N1{S}C({R}C(C1=O){S}C(O)C){R}C2C)C(=O)O){R}C3C{R}C(NC3)C(=O)N(C)C	training set	non-inhibitor
11112879	Clc1c(c(c(c(c1)CC)O)C(=O)NC{S}C2N(CCC2)CC)OC	training set	inhibitor
11112881	O=C(NC(C)(C)C){R}C4{R}C3({R}C({S}C2{S}C({S}C1({S}C(NC(=O)C=C1)CC2)C)CC3)CC4)C	training set	non-inhibitor
11112883	O=C4c3c1c(c2c(cc1)cccc2)ccc3C(=O)C=C4	training set	inhibitor
11112887	S=C(N2CCC({S}C1N=CN=C1)CC2)NC3CCCCC3	training set	inhibitor
11112888	O{S}C3{R}C(N2CCC(c1ccccc1)CC2)CCCC3	training set	non-inhibitor
11112890	O4CCN(CCNc1nnc-2c(c1)CCCc3c-2cccc3)CC4	training set	non-inhibitor
11112894	O(c1c(ccc(c1)CC(=O)N{S}C(c2c(cccc2)N3CCCCC3)CC(C)C)C(=O)O)CC	training set	non-inhibitor
11112896	O(C(=O){R}C2(c1c(cccc1){S}C(CC2)C(=O)OC3C{R}C4[N+]({S}C(C3)CC4)(CC)C)c5ccccc5)C6C{R}C7[N+]({S}C(C6)CC7)(CC)C	training set	non-inhibitor
11112899	F{S}C5C1=CC(=O)C=C{S}C1({R}C4{R}C({S}C3{S}C({S}C2(OC(O{R}C2C3)(C)C)C(=O)CO)(C{R}C4O)C)C5)C	training set	non-inhibitor
11112901	O=C(N){R}C(c1ncccc1)(c2ccccc2)CCN(C(C)C)C(C)C	training set	non-inhibitor
11112903	O{S}C3{S}C61{S}C(N(c2c1cccc2)C){S}C4N5{S}C({R}C3{R}C(C4){R}C({S}C5O)CC)C6	training set	non-inhibitor
11112905	O(c1c(cccc1C)C)C{S}C(N)C	training set	inhibitor
11112906	Cl{S}C32{R}C({R}C1{S}C({R}C(OC(=O)CC)({R}C(C1)C)C(=O)COC(=O)CC)(C{S}C2O)C)CCC4=CC(=O)C=C{S}C43C	training set	non-inhibitor
11112909	Ic1c(c(cc(c1)C{R}C(N)C(=O)O)I)Oc2cc(c(cc2)O)I	training set	non-inhibitor
11112910	O5C(=O){S}C(O)(C1=C(C(=O)N3C(=C1)c2nc4c(cc2C3)cccc4)C5)CC	training set	inhibitor
11112914	S3{S}C1N(C(=O){R}C1NC(=O)Cc2nc(sc2)N)C(=C(C3)CSc4n(nnn4)CCN(C)C)C(=O)O	training set	non-inhibitor
11112916	O1{S}C42{R}C7(OC1){S}C6{S}C({R}C53{R}C2N(C{R}C({S}C3{R}C4O)(CC{S}C5OC)COC)CC)C{S}C({R}C6OC){R}C(OC)C7	training set	non-inhibitor
11112920	s1c(ccc1){R}C2(NCC)C(=O)CCCC2	training set	non-inhibitor
11112922	O{R}C(c1ccccc1)(C2CCCCC2)CC[N+](CC)(CC)CC	training set	non-inhibitor
11112923	S(c2cc1nc([nH]c1cc2)NC(=O)OC)C(C)C	training set	inhibitor
11112926	O(C1C{R}C2[N+]({S}C(C1)CC2)(C)C)C(=O){R}C(c3ccccc3)CO	training set	non-inhibitor
11112928	S3{S}C1N(C(=O){R}C1NC(=O)Cc2sccc2)C(=C(C3)COC(=O)C)c(o)o	training set	non-inhibitor
11112931	S1{R}C2N({S}C(C1(C)C)c(o)o)C(=O){R}C2NC(=O)Cc3ccccc3	training set	non-inhibitor
11112933	Sc1nc(nc2n(cnc21){S}C3O{S}C({S}C(O){S}C3O)CO)N	training set	non-inhibitor
11112936	[n+]1(c(cccc1)C)Cc2c(nc(nc2)CCC)N	training set	non-inhibitor
11112938	O(c1ccc(cc1)C(=N)N)CCCCCOc2ccc(cc2)C(=N)N	training set	non-inhibitor
11112940	O2c1c3c(ccc1OC2){S}C6{R}C(N(C3)C)c4c(cc5c(c4)OCO5)C{S}C6O	training set	inhibitor
11112941	O3{S}C1{S}C(O{S}C({S}C(O){R}C1O)CO)c2c(cc(c(c2O)OC)O)C3=O	training set	non-inhibitor
11112944	O({R}C(c1ncccc1)(c2ccccc2)C)CCN(C)C	training set	non-inhibitor
11112946	O({S}C4C({E}=C(c(o)o)CCC=C(C)C){S}C3{S}C({S}C1({S}C({S}C2({R}C(CC1){S}C({R}C(O)CC2)C)C){R}C(O)C3)C)(C4)C)C(=O)C	training set	non-inhibitor
11112948	O({S}C2{R}C(O){S}C(O{R}C1O{R}C(CC{R}C1N){S}C(NC)C){S}C(N)C{R}C2N){R}C3OC{S}C(O)({S}C(NC){S}C3O)C	training set	non-inhibitor
11112950	O=C(N1CCN(CC1)C)N(CC)CC	training set	non-inhibitor
11112954	S(=O)(=O)(Nc1nc(cc(n1)C)C)c2ccc(cc2)N	training set	non-inhibitor
11112957	S(=O)(=O)(O)c1c(ccc(c1)O)O	training set	non-inhibitor
11112962	S1{R}C2N({S}C(C1(C)C)c(o)o)C(=O){R}C2NC(=O){R}C(c3cscc3)c(o)o	training set	non-inhibitor
11112963	N(CCCc1ccccc1)(CCCc2ccccc2)CC	training set	inhibitor
11112965	S(=O)(=O)(O)CN(C1=C(N(N(C1=O)c2ccccc2)C)C)C	training set	non-inhibitor
11112968	O=C1N(C(=O)N(c2nc[nH]c21)C)C	training set	non-inhibitor
11112971	O=C1N=C(NC2=C1N({R}C(CN2)CNc3ccc(cc3)C(=O)N{S}C(c(o)o)CCc(o)o)C=O)N	training set	non-inhibitor
11112973	Clc2cc1nc3c(c(c1cc2)N{S}C(CCCN(CC)CC)C)cc(cc3)OC	training set	inhibitor
11112976	O{R}C41{R}C({S}C(O){R}C3C(=C1O)C(=O)c2c(cccc2O){S}C3(O)C){S}C(N(C)C)C(=C(C4=O)C(=O)N)O	training set	non-inhibitor
11112980	O(c1cc2c(cc1OC)CCN3{R}C2C{S}C({S}C(C3)CC)C{S}C4NCCc5c4cc(c(c5)O)OC)C	training set	non-inhibitor
11112982	O(c1cc2c(cc1)C{S}C3{S}C4{S}C2(CCN3C)CCCC4)C	training set	non-inhibitor
11112984	O6c1c2c(cc(c1O)OC)CC[N+]({R}C2Cc3cc(c(cc3)O)Oc4cc5c(cc4OC)CCN({R}C5Cc7cc6ccc7)C)(C)C	training set	non-inhibitor
11112986	S1{R}C2N({S}C(C1(C)C)c(o)o)C(=O){R}C2NC(=O)c3c4c(ccc3OCC)cccc4	training set	non-inhibitor
11112987	O{R}C(c1cc(c(cc1)O)O){S}C(NC(C)C)CC	training set	inhibitor
11112989	O=C1{S}C4{S}C({R}C2(C(=C1){S}C3{S}C(CC2)(CC{R}C(C3)(c(o)o)C)C)C)(CC{R}C5{S}C4(CC{S}C(OC(=O)CCc(o)o)C5(C)C)C)C	training set	non-inhibitor
11112992	O{S}C31{R}C({R}C(CC1)C2=CC(=O)OC2)(C{S}C(O){S}C4{S}C6({S}C(O)(CC{S}C43)C{S}C(O{S}C5O{S}C({S}C(O){R}C(O){S}C5O)C)C{R}C6O)CO)C	training set	non-inhibitor
11112994	O({S}C5{R}C2({R}C(C1=CC{S}C3{S}C({S}C1(C{R}C2O)C)(CC{R}C4{R}C3(CC{R}C({S}C4(CO)C)OC)C)C)CC({S}C5O)(C)C)CO)C(=O)C	training set	non-inhibitor
11112999	O4c1c(c(ccc1)OCC(O)COc2c3c(ccc2)OC(=CC3=O)c(o)o)C(=O)C=C4c(o)o	training set	non-inhibitor
11113001	P2(=O)(O{S}C1{S}C(OC(=O)CCC){R}C(O{S}C1CO2)n4c3ncnc(c3nc4)NC(=O)CCC)O	training set	non-inhibitor
11113005	O4{S}C({S}C3O{R}C({S}C2O{R}C({R}C1O{S}C(O)({S}C(C{R}C1C)C)CO)C{R}C2C)(CC3)CC)(CC{S}C54O{S}C({R}C({R}C(O)C5)C){R}C({S}C(OC){S}C(c(o)o)C)C)C	training set	non-inhibitor
11113009	S3{S}C1N(C(=O){R}C1NC(=O)CSc2ccncc2)C(=C(C3)COC(=O)C)c(o)o	training set	non-inhibitor
11113011	O2{S}C({S}C1O{S}C({S}C(O)(CC1)CC)C)(C{R}C({S}C2{S}C(C(=O){R}C({R}C(O){R}C(CCc3c(c(c(cc3)C)O)-c(o)o)C)C)CC)C)CC	training set	non-inhibitor
11113014	Clc1c(cc(cc1)C(=O)NN3c2c(cccc2)C{R}C3C)S(=O)N	training set	non-inhibitor
11113017	S3{S}C1N(C(=O){R}C1NC(=O){S}C(O)c2ccccc2)C(=C(C3)CSc4n(nnn4)C)c(o)o	training set	non-inhibitor
11113020	O{R}C(c1cc(ccc1)O){S}C(N)C	training set	non-inhibitor
11113022	S1{R}C2N({S}C(C1(C)C)c(o)o)C(=O){R}C2NC(=O){S}C(NC(=O)N3C(=O)NCC3)c4ccccc4	training set	non-inhibitor
11113024	O{R}C1{S}C({S}C({S}C(O)C1)CC{Z}=CCCCC(=O)O)C{Z}=C{S}C(O)CCCCC	training set	non-inhibitor
11113026	Oc2cc1[nH]c3c(c1cc2)ccnc3C	training set	inhibitor
11113030	S3{S}C1N(C(=O){R}C1NC(=O){S}C(S(=O)(=O)O)c2ccccc2)C(=C(C3)C[n+]4ccc(cc4)C(=O)N)c(o)o	training set	non-inhibitor
11113031	S2c1c(cc(cc1)SCC)N(c3c2cccc3)CCCN4CCN(CC4)C	training set	inhibitor
11113033	n1c(cccc1)CCNC	training set	non-inhibitor
11113035	O(c1ccc(cc1)CCOC)C{R}C(O)CNC(C)C	training set	non-inhibitor
11113038	S1{R}C2N({S}C(C1(C)C)c(o)o)C(=O){R}C2NC(=O){S}C(NC(=O)N3C(=O)C(=O)N(CC3)CC)c4ccccc4	training set	non-inhibitor
11113041	O{S}C(C(CO)(C)C)C(=O)NCCc(o)o	training set	non-inhibitor
11113045	O=C(c1n(c(cc1)Cc(o)o)C)c2ccc(cc2)C	training set	non-inhibitor
11113048	Oc1c(cc2c(c1C(=O)O)cccc2)Cc3c4c(cc(c3O)C(=O)O)cccc4	training set	non-inhibitor
11113050	Clc1c3c(c(cc1)O)C(=O)C2=C(O){R}C4(O){R}C({S}C({R}C2C3=C)O){S}C(N(C)C)C(=C(C4=O)C(=O)N)O	training set	non-inhibitor
11113053	S3{S}C1N(C(=O){R}C1NC(=O)C({Z}=NOC(C(=O)O)(C)C)c2nc(sc2)N)C(=C(C3)C[n+]4ccccc4)c(o)o	training set	non-inhibitor
11113056	Fc1ccc(cc1)C(=O)C4CCN(CCN3C(=O)c2c(cccc2)NC3=O)CC4	training set	non-inhibitor
11113058	Clc1ccc(cc1)CCCC[N+](CCCCCCC)(CC)CC	training set	non-inhibitor
11113061	S(=O)(=O)(O{S}C5{S}C(OC(=O)CC(C)C){R}C(O{S}C4C{S}C3({S}C2{S}C1({S}C(O)C(=C){R}C(C1)CC2)CC{R}C3{R}C(C4)C(=O)O)C)O{R}C({S}C5OS(=O)(=O)O)CO)O	training set	non-inhibitor
11113063	S3{S}C1N(C(=O){R}C1NC(=O)C({Z}=NOC)c2nc(sc2)N)C(=C(C3)C[N+]4(CCCC4)C)c(o)o	training set	non-inhibitor
11113067	S(=O)(=O)(O)c1c2c(c(c(c1)S(=O)(=O)O)N)c(c(cc2)N{Z}=Nc3c(cc(cc3)-c4cc(c(cc4)N{Z}=Nc6c(c5c(c(cc(c5N)S(=O)(=O)O)S(=O)(=O)O)cc6)O)OC)OC)O	training set	inhibitor
11113068	O{S}C({S}C1N2C{R}C({R}C(C1)CC2)CC)c3c4c(ncc3)ccc(c4)OC	training set	non-inhibitor
11113072	S4{S}C1N(C(=O){R}C1NC(=O){S}C(NC(=O)N2C(=O)C(=O)N(CC2)CC)c3ccc(cc3)O)C(=C(C4)CSc5n(nnn5)C)C(=O)O	training set	non-inhibitor
11113322	S1(=O)(=O)N(C(=C(O)c2c1cccc2)C(=O)Nc3ncccc3)C	training set	inhibitor
11113324	O=C(N1C(=O)CCC1)c2ccc(cc2)OC	training set	inhibitor
11113331	O=C(O)C{E}=C(C{Z}=CC{E}=C(C{Z}=CC1=C(CCCC1(C)C)C)C)C	training set	inhibitor
11113339	O=C1N(N=C(C1)C)c2ccccc2	training set	inhibitor
11113342	Clc1c(cccc1Cl)-c2nnc(nc2N)N	training set	non-inhibitor
11113345	Clc1cc4c(cc1)C(=C2CCN(CC2)C(=O)OCC)c3ncccc3CC4	training set	non-inhibitor
11113346	s1c2c(nc1N)ccc(c2)OC(F)(F)F	training set	inhibitor
11113355	O(c1ccc(cc1)CN(c2ncccc2)CCN(C)C)C	training set	non-inhibitor
11113359	Oc1cc(cc(c1)O)C{Z}=Cc2ccc(cc2)O	training set	inhibitor
11113364	S(=O)(=O)(N1CCNCCC1)c2c3c(ccc2)cncc3	training set	non-inhibitor
11113368	Clc1cc3c(cc1)CCc2c(cccc2)N3CCCN(C)C	training set	inhibitor
11113375	P(=O)(O)(O)CC{S}C(N)C(=O)O	training set	inhibitor
11113383	O=C(NCC(=O)O)CC{R}C(N)C(=O)O	training set	non-inhibitor
11113386	O6c1c(ccc2c1OCO2){R}C({S}C3N(CCc4c3cc5c(c4)OCO5)C)C6=O	training set	inhibitor
11113394	O=C(O)C{Z}=CCN	training set	non-inhibitor
11113404	O=C(O){S}C(N)C	training set	non-inhibitor
11113406	S(=O)(O)CCN	training set	non-inhibitor
11113408	O=C(O){R}C(N)CC(=O)O	training set	non-inhibitor
11113414	O=C(O){S}C1NC{S}C({R}C1CC(=O)O)C(=C)C	training set	non-inhibitor
11113418	O=C(O){S}C(N)CO	training set	non-inhibitor
11113420	O=C(O)C1=CCNCC1	training set	non-inhibitor
11113425	Clc1ccc(cc1){R}C(CS(=O)(=O)O)CN	training set	non-inhibitor
11113430	O=C(N{S}C(C(=O)O)CC(=O)N)Cc1c(cc(cc1)O)O	training set	non-inhibitor
11113433	O=C1N(O)CC{R}C1N	training set	non-inhibitor
11113435	o1nc(cc1{S}C(N)C(=O)O)O	training set	non-inhibitor
11113441	Oc1c(ccc(c1){R}C(N)C(=O)O)C(=O)O	training set	non-inhibitor
11113445	O=C(O){R}C(N)c1ccc(cc1)C(=O)O	training set	non-inhibitor
11113449	Oc1c(cc(cc1){R}C(N)C(=O)O)C(=O)O	training set	non-inhibitor
11113454	O=C(O){S}C(N)(c1ccc(cc1)C(=O)O)C	training set	non-inhibitor
11113463	O=C(NCCc1c2c([nH]c1)cccc2)C	training set	inhibitor
11113468	Clc2c1c(c(ccc1)S(=O)(=O)NCCCCCCN)ccc2	training set	inhibitor
11113471	Clc1ccc(cc1)C(=O)NCCN	training set	inhibitor
11113479	N(C(=N)N)CCCCNC(=N)N	training set	non-inhibitor
11113481	O(c1ccc(cc1)CC(=O)N)C{S}C(O)CNC(C)C	training set	non-inhibitor
11113485	O2c1c(cccc1)OC{S}C2CNCCN3C(=O)CC4(CC3=O)CCCC4	training set	inhibitor
11113488	O(c1c(ccc(c1)C{R}C2NC(=O)NC2)OC)CCCC	training set	inhibitor
11113490	Clc1ccc(cc1){S}C(CC(=O)O)CN	training set	non-inhibitor
11113498	Clc1cc(ccc1)Nc2nnc(c3c2cccc3)-c4ccccc4	training set	inhibitor
11113501	O(C(=O)c2c(c1c(n(nc1)CC)nc2)NN=C(C)C)CC	training set	inhibitor
11113502	Clc1cc(ccc1)NC(=N)NC(=N)N	training set	non-inhibitor
11113508	Clc1ccc(cc1){S}C2S(=O)(=O)CCC(=O)N2C	training set	non-inhibitor
11113509	O=C(N)c2cc1c([nH]cc1CCN)cc2	training set	inhibitor
11113513	O(c1c(ccc(c1)CNC(=O)CCCCC{Z}=CC(C)C)O)C	training set	inhibitor
11113516	O(C(=O)C2(c1ccc(cc1)[N+](=O)[O-])CCCC2)CCN(CC)CC	training set	inhibitor
11113521	Oc1nc(nc(c1)N)N	training set	non-inhibitor
11113524	O(c1c(cc(cc1OC)C(=O)OCCCN3CCN(CCCOC(=O)c2cc(c(c(c2)OC)OC)OC)CCC3)OC)C	training set	non-inhibitor
11113529	Oc1c(ccc(c1)C=C(C#N)C#N)O	training set	inhibitor
11113533	S=C(N)C({E}=Cc1cc(c(cc1)O)O)C#N	training set	inhibitor
11113536	o1c(ccc1C{Z}=NN2C(=O)NC(=O)C2)-c3ccc(cc3)[N+](=O)[O-]	training set	inhibitor
11113538	Clc1c(ccc(c1)CCN(CCN2CCCCCC2)C)Cl	training set	inhibitor
11113540	S(C(=N)N)CCCCN(C)C	training set	non-inhibitor
11113551	O=C2c1c(cccc1)CC{S}C2CNCCc3ccc(cc3)O	training set	inhibitor
11113554	S(=O)(=O)(N1{R}C(CNCC1)C)c2c3c(ccc2)cncc3	training set	non-inhibitor
11113561	O=C1N(C(=O)N(c2[nH]c(nc21)COC)CC(C)C)C	training set	inhibitor
11113562	O=C1N(C(=O)c2c1cccc2)CCCCN4CCN(c3c(cccc3)OC)CC4	training set	non-inhibitor
11113564	O4c1c(ccc(c1)OCCCN3CCN(c2ccccc2)CC3)OC4	training set	inhibitor
11113570	n1c(c[nH]c1)C{R}C(N)C	training set	non-inhibitor
11113572	S(CCOC(=O)C1=C(NC(=C({R}C1C)C(=O)OC)C)C)c2ccccc2	training set	inhibitor
11113577	O=C(N{S}C(c1ccccc1)C)C({E}=Cc2cc(c(cc2)O)O)C#N	training set	inhibitor
11113584	O3{S}C5{S}C21{S}C(O)({R}C(N(CC1)CC=C)Cc4c2c3c(cc4)O)CCC5{E}=NN{Z}=C%10{R}C7Oc6c8c(ccc6O)C{S}C9{R}C({R}C87CCN9CC=C)(O)CC%10	training set	non-inhibitor
11113588	O3{S}C5{S}C21{R}C(O)({R}C(N(CC1)CC=C)Cc4c2c3c(cc4)O)CCC5=O	training set	non-inhibitor
11113589	O(C(=O)C1=C(NC(=C({R}C1c2cc(ccc2)[N+](=O)[O-])C(=O)OCCOC)C)C)C(C)C	training set	inhibitor
11113599	O1{S}C({R}C1C(=O)c2ccccc2)c3ccc(cc3)-c4ccccc4	training set	inhibitor
11113601	O=C(Nc1ccccc1)C({E}=Cc2cc(c(cc2)O)O)C#N	training set	inhibitor
11113605	S(=O)(=O)(O)c1c(ccc(c1)S(=O)(=O)O)N{Z}=Nc2nc(c(c(c2COP(=O)(O)O)C=O)O)C	training set	non-inhibitor
11113607	FC(F)(F)c1cc(ccc1)C{S}C(NCCCc2ccccc2)C	training set	inhibitor
11113615	FC(F)(F)c2cc1nc(c3n(c1cc2)ccc3)N4CCN(CC4)C	training set	inhibitor
11113621	O(c1c(cc(cc1OC)Cc2c(nc(nc2)N)N)OC)C	training set	non-inhibitor
11113630	[O-][N+](=O)NC(=N)NCCC{S}C(N)C(=O)O	training set	non-inhibitor
11113632	N3(c1nc2c(nc1C#N)cccc2)CCN(CC3)CC=C	training set	inhibitor
11113634	Clc1c(cccc1)-c2nc(cc3c2cccc3)C(=O)N({S}C(CC)C)C	training set	non-inhibitor
11113636	O(NC(=N)N)CC{S}C(N)C(=O)O	training set	non-inhibitor
11113643	S(=O)(=O)(O)c1c(cc(cc1)S(=O)(=O)O)N{Z}=Nc2nc(c(c(c2COP(=O)(O)O)C=O)O)C	training set	non-inhibitor
11113645	O1{S}C4{S}C3(c2c1c(ccc2CN(CC3)C)OC)C=C{S}C(O)C4	training set	non-inhibitor
11113646	O{R}C5({R}C4({S}C({S}C3{R}C({R}C2(C(=Cc1oncc1C2)CC3)C)CC4)CC5)C)C#C	training set	inhibitor
11113648	Clc1c(c(ccc1)Cl)N=C2NCCN2	training set	non-inhibitor
11113650	O({S}C5{R}C4({R}C({S}C1{S}C({S}C3({R}C(CC1)C{S}C(OC(=O)C){S}C([N+]2(CCCCC2)C)C3)C)CC4)C{R}C5[N+]6(CCCCC6)C)C)C(=O)C	training set	non-inhibitor
11113656	Oc1cc2c(cc1)CC{R}C(N(CCC)CCC)C2	training set	non-inhibitor
11113662	n51c4c(c2c1ccc(c2)C3CCCCC3)CCC{S}C4NCC5	training set	inhibitor
11113664	n1c(ccc2c1cccc2)C3=NCCN3	training set	inhibitor
11113666	SC(=S)N1CCCC1	training set	inhibitor
11113667	Clc1cc(c(cc1N)OC)C(=O)OCCCN2CCCCC2	training set	non-inhibitor
11113669	N2C{R}C(c1c(cccc1)C2)c3ccccc3	training set	non-inhibitor
11113671	s1c(nc2c1cccc2)N5CCN(Cc3cc4c(cc3)OCO4)CC5	training set	inhibitor
11113674	O=C1NC(=O)C(=C1c2c3c(n(c2)CCCN(C)C)cccc3)c4c5c([nH]c4)cccc5	training set	inhibitor
11113684	Clc1ccc(cc1)CNC(=N)SCCCc2nc[nH]c2	training set	inhibitor
11113692	O(c1c(cccc1)Cc2ccccc2)CCCCNC	training set	inhibitor
11113699	Ic1ccc(cc1)CCNC(=N)SCCCc2nc[nH]c2	training set	inhibitor
11113702	Clc1cc3c(cc1)Oc2c(cccc2)C=C3N4CCN(CC4)C	training set	inhibitor
11113705	N(N)C(=N)N	training set	non-inhibitor
11113711	IC{Z}=CCN({R}C2Cc1c(cccc1O)CC2)CCC	training set	inhibitor
11113715	o1nc(c2c1CNCC2)O	training set	non-inhibitor
11113718	Clc1ccc(cc1){R}C({R}C(N)C(=O)O)CC(=O)O	training set	non-inhibitor
11113719	O(c1c2c(c(cc1)C)CCC2)C{R}C(O){S}C(NC(C)C)C	training set	inhibitor
11113727	O(c1c2c(ccc1)cccc2)C{S}C(O)CNC(C)C	training set	inhibitor
11113739	O(c1c2c(ccc1)cccc2)C{R}C(O)CO	training set	inhibitor
11113741	S(=O)(=O)(O)c1ccc(cc1){S}C(N)(C(=O)O)C	training set	non-inhibitor
11113750	Clc1cc(ccc1)N2CCNCC2	training set	inhibitor
11113753	O=C(N)CCCCCCCC{Z}=CCCCCCCCC	training set	inhibitor
11113756	ClCCc1scnc1C	training set	inhibitor
11113760	Clc1c(c(ccc1)Cl)C{Z}=NNC(=N)N	training set	inhibitor
11113763	O{S}C5{R}C({R}C4{R}C(CN2{S}C(c1[nH]c3c(c1CC2)cccc3)C4)CC5)C(=O)OC	training set	inhibitor
11113772	O(c2cc1c([nH]cc1CCN)cc2)CCCCCCCCC	training set	inhibitor
11113782	O=C(N(Cc1ccncc1)CC){R}C(c2ccccc2)CO	training set	inhibitor
11113784	O(c1ccc(cc1)COCCOC(C)C)C{R}C(O)CNC(C)C	training set	non-inhibitor
11113789	FC(F)(F)c1c(cccc1)-n2cncc2	training set	inhibitor
11113794	O4{S}C6{S}C31{S}C(O)({R}C(N(CC1)CC2CC2)Cc5c3c4c(cc5)O)CC{R}C6NC(=O)C{Z}=CC(=O)OC	training set	non-inhibitor
11113799	n1c(c[nH]c1)CC2CCNCC2	training set	non-inhibitor
11113808	S(=O)(=O)(Nc1c(cc(cc1)[N+](=O)[O-])OC2CCCCC2)C	training set	inhibitor
11113810	O=C1NC(=Nc2nn[nH]c21)c3c(cccc3)OCCC	training set	inhibitor
11113814	N1C(=N)CCCC1	training set	non-inhibitor
11113816	N2{S}C3(c1c(cccc1){S}C2Cc4c3cccc4)C	training set	non-inhibitor
11113820	O4c1c(cc2c(c1)C(=NN({R}C2C)C(=O)NCCC)c3ccc(cc3)N)OC4	training set	inhibitor
11113823	Clc1cc2c(cc1)N=C(NS2(=O)=O)C	training set	inhibitor
11113825	N(C(=N)NC(=N)N)c1ccccc1	training set	inhibitor
11113833	O2c1c(cccc1)OC{R}C2Cc3n(ccn3)CC	training set	inhibitor
11113837	Clc1cc(c(cc1N)OC)C(=O)CCC2CCN(CC2)CCNS(=O)(=O)C	training set	non-inhibitor
11113839	O(c1c(cccc1)-n2cccc2)C{R}C(O)CNC(C)C	training set	inhibitor
11113846	Clc1c2c(c(c(c1Cl)Cl)Cl)C[N+](C2)(CC[N+](C)(C)C)C	training set	non-inhibitor
11113848	Clc1ccc(cc1)C4(O)CCN(Cc2c3c([nH]c2)cccc3)CC4	training set	inhibitor
11113858	P(=O)(O)(O)C{S}C1C{R}C2{R}C(CC1)CN{S}C(C2)C(=O)O	training set	non-inhibitor
11113863	O2{R}C1({R}C(C1)C({Z}=NO)c3c2cccc3)C(=O)Nc4ccccc4	training set	inhibitor
11113866	Clc1c(c(ccc1)Cl)CC(=O)NC(=N)N	training set	non-inhibitor
11113867	O4c1c(ccc(c1)CN3CCN(c2ncccn2)CC3)OC4	training set	inhibitor
11113870	O(c1c2c(ccc1)CC{R}C(NC(=O)CC)C2)C	training set	inhibitor
11113873	O5c2c1n(c(c(c1ccc2)C(=O)c3cc4c(cc3)cccc4)C){R}C(C5)CN6CCOCC6	training set	non-inhibitor
11113877	S(=O)(=O)(N)c3c2c(c1nc(c(nc1cc2[N+](=O)[O-])O)O)ccc3	training set	non-inhibitor
11113878	Oc1nc2c(nc1O)cc(c(c2)[N+](=O)[O-])C#N	training set	inhibitor
11113881	O3c1c(ccc(c1)C(=O)N2CCCCC2)OC3	training set	inhibitor
11113884	S(=O)(=O)(Nc1c3c(ccc1O){R}C(C2=NCCN2)CCC3)C	training set	non-inhibitor
11113888	s1c(ccc1)COc3cc2c([nH]cc2C{S}C(N)C)cc3	training set	inhibitor
11113892	O4{S}C(n2c1nc(nc(c1nc2)N)NCCc3ccc(cc3)CCC(=O)O){S}C(O){S}C(O){S}C4C(=O)NCC	training set	non-inhibitor
11113899	O(C(=O)C1=C(NC(=C(C1c2c(cccc2)[N+](=O)[O-])C(=O)OC)C)C)C	training set	inhibitor
11113907	n1c(cc2c(c1)cccc2)C3=NCCN3	training set	inhibitor
11113910	N({R}C(Cc1ccccc1)C)(CC#C)C	training set	inhibitor
11113919	o1nc(c(c1C(C)(C)C)C{S}C(N)C(=O)O)O	training set	non-inhibitor
11113920	O(c1c(cccc1)N2CCN(CC2)CCCCNC(=O)c3ccc(cc3)-c4ccc(cc4)C(=O)C)C	training set	inhibitor
11113929	Ic2cc1n(c(c(c1cc2)C(=O)c3ccc(cc3)OC)C)CCN4CCOCC4	training set	inhibitor
11113931	O(C(=O)C1=C(NC(=C({S}C1c2cc(ccc2)[N+](=O)[O-])C(=O)OC)C)C)CCCN5CCC(c3ccccc3)(c4ccccc4)CC5	training set	non-inhibitor
11113935	O{S}C5{S}C({R}C4{R}C(CN2{S}C(c1[nH]c3c(c1CC2)cccc3)C4)CC5)C(=O)OC	training set	non-inhibitor
11113937	O3c1c(cccc1-c2ccccc2)C(=O)C=C3N4CCOCC4	training set	inhibitor
11113942	ON(N(CCCCNCCCN)CCCN)N=O	training set	non-inhibitor
11113946	S(C({E}=C(C({Z}=C(Sc1c(cccc1)N)N)C#N)C#N)N)c2c(cccc2)N	training set	inhibitor
11113950	S(=O)(=O)(O)c8c1c(c(ccc1NC(=O)c2ccc(cc2)NC(=O)c3ccc(cc3)NC(=O)Nc4ccc(cc4)C(=O)Nc5ccc(cc5)C(=O)Nc6c7c(c(cc6)S(=O)(=O)O)cc(cc7S(=O)(=O)O)S(=O)(=O)O)S(=O)(=O)O)cc(c8)S(=O)(=O)O	training set	inhibitor
11113955	Clc1nc(ccc1)N2CCC(N)CC2	training set	inhibitor
11113966	Clc4cc3c1n(nc(n1)-c2occc2)c(nc3cc4)NC(=O)Cc5ccccc5	training set	inhibitor
11113968	Clc1cc2c(cc1)N{R}C(NS2(=O)=O)C	training set	inhibitor
11113975	O2c1c(c(cc(c1)O)O)C(=O)C=C2c3ccc(cc3)O	training set	inhibitor
11113977	O2C1=C(C(=O)C(=C(C1=Nc3c2c(ccc3C(=O)N{S}C4C(=O)N{S}C(C(=O)N5{R}C(C(=O)N(CC(=O)N({S}C(C(=O)O{S}C4C)C(C)C)C)C)CCC5)C(C)C)C)C(=O)N{S}C6C(=O)N{S}C(C(=O)N7{R}C(C(=O)N(CC(=O)N({S}C(C(=O)O{S}C6C)C(C)C)C)C)CCC7)C(C)C)N)C	training set	non-inhibitor
11113981	O({R}C4{S}C31{R}C({R}C(NC1=O)Cc2ccccc2){S}C(C(=C){S}C(O){R}C3C{Z}=CC{S}C(C(=O){S}C(O)(C{Z}=C4)C)C)C)C(=O)C	training set	non-inhibitor
11113984	Oc1c(cc(c(c1)C(C)(C)C)O)C(C)(C)C	training set	inhibitor
11113987	S(=O)(=O)(O)c6c1c(c(ccc1NC(=O)c2cc(ccc2)NC(=O)Nc3cc(ccc3)C(=O)Nc4c5c(c(cc4)S(=O)(=O)O)cc(cc5S(=O)(=O)O)S(=O)(=O)O)S(=O)(=O)O)cc(c6)S(=O)(=O)O	training set	non-inhibitor
11113991	S(CCc1ccc(cc1)OCc2ccc(cc2)[N+](=O)[O-])C(=N)N	training set	inhibitor
11113994	P(=O)(O)(CC1CCCCC1)CCCN	training set	non-inhibitor
11113997	Clc1c(cccc1)-c2cc(cc(c2)C{S}C(N)C(=O)O)CP(=O)(O)O	training set	non-inhibitor
11114002	O{R}C9({R}C6N(c1c(cc(c(c1)OC){R}C3(c2[nH]c5c(c2CCN4C{R}C(C3)C{S}C(O)(C4)CC)cccc5)C(=O)OC){R}C76{R}C8N(CC7)CC=C{R}C8({R}C9C(=O)OC)CC)C=O)C(=O)OC	training set	non-inhibitor
11114004	O{S}C1{R}C(O){R}C(O)CN{R}C1CO	training set	non-inhibitor
11114007	Fc1ccc(cc1)-c2nc([nH]c2-c3ccncc3)-c4ccc(cc4)O	training set	inhibitor
11114010	S(=O)(CC1(OC)CCN(CC1)CCc2c3c([nH]c2)ccc(c3)F)c4ccccc4	training set	non-inhibitor
11114014	OCCNc2nc1n(cnc1c(n2)NCc3ccccc3)C	training set	inhibitor
11114015	O({R}C1{R}C(NC{S}C1O)Cc2ccc(cc2)OC)C(=O)C	training set	non-inhibitor
11114018	Brc1c(cc(cc1)Br)NC(=O)C({E}=C(O)C)C#N	training set	inhibitor
11114023	S1{R}C(C(=O)NC1=O)Cc2ccc(cc2)OCC3(CCCCC3)C	training set	inhibitor
11114026	Clc1nc(nc(c1)Nc2c(c(ccc2)C)C)SCC(=O)O	training set	non-inhibitor
11114028	O=C(Nc1cc(c(cc1)C)NC(=O)c2ccc(cc2)O)c3cc(ccc3)N(C)C	training set	inhibitor
11114030	O=C(N2c1c(cccc1)C{S}C2C(=O)NCCCC){R}C(N)CC	training set	inhibitor
11114039	Clc1ncc(cc1)C2=CCC{S}C3N{S}C2CC3	training set	inhibitor
11114043	s1c(c(c(c1C)C)C(=O)c2cc(ccc2)C(F)(F)F)N	training set	inhibitor
11114047	O=C(Nc2cc1c(n(cc1)C)cc2)Nc3cnccc3	training set	inhibitor
11114049	FC(F)(F)c1c(cc4c(c1)N(C(=O)Nc2cc(cc(c2)F)-c3cnccc3)CC4)OC	training set	inhibitor
11114053	S(c1c(cc2c(c1)CCN2C(=O)Nc3cnccc3)C(F)(F)F)C	training set	inhibitor
11114055	O2C4=C({R}C(C1C(=O)CC(CC1=O)(C)C)c3c2cccc3)C(=O)CC(C4)(C)C	training set	non-inhibitor
11114061	O=C(O)c1c(ccc(c1){R}C(N)C(=O)O)C(=O)O	training set	non-inhibitor
11114062	n1(nc(c2c1ncnc2N)-c3ccc(cc3)C)CC(C)(C)C	training set	inhibitor
11114065	S1N({S}C(NC1{E}=NC)c2ccccc2)c3ccccc3	training set	inhibitor
11114067	O=C(c1c(c([nH]c1C)C)C(=O)OC)c2c(cccc2)Cc3ccccc3	training set	inhibitor
11114070	P(=O)(O)(O)CC({E}=C{R}C(N)C(=O)OCC)C	training set	non-inhibitor
11114073	S(=O)(=O)(N({R}C2c1c(ccc(c1)C#N)OC({S}C2O)(C)C)C)CC	training set	non-inhibitor
11114074	O3c1c(cccc1OC{S}C2OCCNC2)C=C(C3)CN4CCOCC4	training set	inhibitor
11114076	O({R}C5{S}C2{S}C1(N(CCC1)CCc3c2cc4c(c3)OCO4)C=C5OC)C(=O){R}C(O)(CC(=O)OC)CCCC(O)(C)C	training set	non-inhibitor
11114078	Clc1cc2c(cc1Cl)NC(=O)N2CC	training set	inhibitor
11114082	Brc1sc(c(c1)-c2ccc(cc2)S(=O)(=O)C)-c3ccc(cc3)F	training set	inhibitor
11114085	S(=O)(=O)(Nc1onc(c1C)C)c3c2c(c(ccc2)N(C)C)ccc3	training set	non-inhibitor
11114093	OC1=C(C(=O)N(c2c1cccc2)C)C(=O)N(c3ccccc3)C	training set	non-inhibitor
11114097	O(C(=O)c1n(cnc1){R}C(c2ccccc2)C)CC	training set	inhibitor
11114102	Clc1cc(ccc1Cl)CC(=O)N2{R}C(CN(CC2)C(=O)OC)CN3CCCC3	training set	non-inhibitor
11114106	Oc1ccc(cc1){R}C(Cc2ccc(cc2)O)C#N	training set	inhibitor
11114108	n1(c3c(c2c1cccc2)cccc3)CCCN4C{R}C(N{S}C(C4)C)C	training set	inhibitor
11114110	O=C2NC(=C(c1ccncc1)C=C2C#N)C	training set	non-inhibitor
11114114	Clc1c(cc(cc1)[N+](=O)[O-])C(=O)Nc2ccccc2	training set	inhibitor
11114117	O(c1c(cccc1)CC)C{S}C(O)CN{S}C3c2c(cccc2)CCC3	training set	inhibitor
11114119	Oc1c(cc(cc1C(C)(C)C)CC(CO)(C)C)C(C)(C)C	training set	inhibitor
11114128	Brc1cc2c(cc1)OC(=C({S}C2{S}C(C(=O)OCC)C#N)C(=O)OCC)N	training set	inhibitor
11114132	S(C2=C(SCCO)C(=O)c1c(cccc1)C2=O)CCO	training set	inhibitor
11114135	s1c3c(nc1SCc2c(c(cc(c2)C{E}=C(C(=O)N)C#N)OC)O)cccc3	training set	inhibitor
11114137	Oc4cc1c([nH]cc1CCCCN3CC=C(c2ccccc2)CC3)cc4	training set	inhibitor
11114142	O=C1N(C(=O)N(c2nc([nH]c21)-c3ccc(cc3)OCC(=O)Nc4ccc(cc4)C(=O)C)CCC)CCC	training set	non-inhibitor
11114144	Clc1cc(ccc1Cl){R}C3c2c(cccc2){R}C(NC)C3	training set	inhibitor
11114148	O3{R}C1({R}C(O)({R}C2({S}C({S}C(OC(=O)CCN(C)C){S}C1OC(=O)C)C(CC{S}C2O)(C)C)C)C(=O)C{R}C3(C=C)C)C	training set	non-inhibitor
11114153	Clc1c(ccc(c1)Cl)C4=C(c2c3c(n(c2)C)cccc3)C(=O)NC4=O	training set	inhibitor
11114156	O1{S}C(O){S}C(NC(=O)N(N=O)C){R}C(O){S}C(O){S}C1CO	training set	non-inhibitor
11114159	Fc1cc(ccc1)C{Z}=NN{Z}=Cc2cc(ccc2)F	training set	inhibitor
11114162	O=C4{S}C3({R}C({R}C1{R}C({R}C2(C(=CC1)C{S}C(OCCN(CC)CC)CC2)C)CC3)CC4)C	training set	non-inhibitor
11114166	O1{S}C54{R}C3({R}C2({R}C1OC(=O){R}C2O){S}C(C{R}C3OC4=O)C(C)(C)C){R}C(O){R}C6OC(=O){S}C({R}C65O)C	training set	non-inhibitor
11114169	O=C(N3c2c(cc1n(ccc1c2)C)CC3)Nc4cnccc4	training set	inhibitor
11114170	Oc1cc2c(cc1O)CCN(C{S}C2c3ccccc3)CC=C	training set	non-inhibitor
11114175	Clc1c(onc1O)C{R}C(N)C(=O)O	training set	non-inhibitor
11114176	[nH]1c4c(c2c1cccc2)CCN(CCc3c(cccc3)C4)C	training set	inhibitor
11114182	O=C(c1c2n(nc1C(C)C)cccc2)C(C)C	training set	inhibitor
11114185	Clc4cc3c1n(nc(n1)-c2occc2)c(nc3cc4)N	training set	inhibitor
11114186	O5{S}C(C21CC3CC(C1)CC(C2)C3)Cc4c(ccc(c4O)O){R}C5CN	training set	non-inhibitor
11114190	FC(F)(F)c1cc(ccc1)-c3nn2c(nnc2C)cc3	training set	inhibitor
11114193	S(=O)(=O)(c1ccc(cc1)C)C{Z}=CC#N	training set	inhibitor
11114199	Fc1ccc(cc1){R}C(Oc2ccc(cc2)-c3ccccc3)CCN(CC(=O)O)C	training set	non-inhibitor
11114200	ClC(Cl)(Cl){S}C(O)Cc1ccncc1	training set	inhibitor
11114202	O{R}C32C(=Nc1c(cc(cc1)C)C2=O)N(CC3)c4ccccc4	training set	inhibitor
11114211	O=C1N(C(=CC(=O)N1C)NCCCN3CCN(c2c(cccc2)OC)CC3)C	training set	non-inhibitor
11114213	S(=O)(c2nn1nnnc1cc2)c3ccccc3	training set	inhibitor
11114216	Clc1cc(c(cc1N)OC)C(=O)N{S}C2C3CCN(C2)CC3	training set	non-inhibitor
11114220	O(c1cc(ccc1)Nc2c(cccc2)C(=O)O)Cc3nc4c(cc3)cccc4	training set	inhibitor
11114225	O=C2Nc1c(cccc1)C2{E}=C4Nc3c(cccc3)C4{E}=NO	training set	inhibitor
11114226	O=C(NC(C)C)CCCCCCCCCCCCCCC	training set	non-inhibitor
11114229	Clc1cc(ccc1)C2=NC(=O)N(c3nc(ccc32)CC)CC	training set	inhibitor
11114232	Clc2cc1n(ccc1cc2F)C{R}C(N)C	training set	inhibitor
11114238	N2=C1C(=NN=C1N)Nc3c2cccc3	training set	inhibitor
11114243	O(c1cc(ccc1)N{Z}=CN{Z}=Cc2cc(ccc2)OC)C	training set	inhibitor
11114244	O{S}C(C(=O)N{S}C(C(=O)O)CC(C)C){R}C(N)Cc1ccccc1	training set	non-inhibitor
11114246	O({S}C2{S}C({R}C(N1CCCCC1){S}C(O)C2)CCC{Z}=CCCC(=O)O)Cc3ccc(cc3)-c4ccccc4	training set	non-inhibitor
11114251	Fc2c1nc(cc(c1cc(c2)F)NC(=O)Nc3ccc(cc3)N(C)C)C	training set	inhibitor
11114253	O({R}C2{R}C1{S}C({S}C(C=CC1=C{R}C(C2)C)C)CC{R}C3OC(=O)C{R}C(O)C3)C(=O)C(CC)(C)C	training set	non-inhibitor
11114257	O(c1ccc(cc1)-c2n(nc(c2C)-c3ccc(cc3)O)-c4ccc(cc4)O)CCN5CCCCC5	training set	inhibitor
11114261	S(c1nc(c(c(n1)NC2CCCC2)[N+](=O)[O-])NC3CCCC3)C	training set	inhibitor
11114264	S(C(=O){R}C4({S}C3({R}C({S}C2{S}C(F)({S}C1(C(=CC(=O)C=C1){S}C(F)C2)C){S}C(O)C3)C{R}C4C)C)CC(=O)CO)CF	training set	non-inhibitor
11114269	Clc1cc(cc(c1)N)Nc2nc(nc3n(cnc32)C(C)C)N{R}C(C(C)C)CO	training set	inhibitor
11114273	O=C1N(C(=O)C=CN1C{S}C(N)C(=O)O)Cc2c(cccc2)C(=O)O	training set	non-inhibitor
11114274	Clc1cc(ccc1Cl)CN3c2c(cccc2)C(=O)C3=O	training set	inhibitor
11114276	Fc1ccc(cc1){S}C4{S}C(COc2cc3c(cc2)OCO3)CNCC4	training set	inhibitor
11114280	O=C1C(=C(O)C(=O)C=C1O)CCCCCCCCCCC	training set	non-inhibitor
11114281	n41c3c(c2c1CCCC2)cccc3CNCC4	training set	inhibitor
11114283	O(C(=O)C1=CCCN(C1)C)CC#CC	training set	inhibitor
11114291	[n+]51c7c(c(cc1)NCc2ccc(cc2)CNc3c6c([n+](cc3)Cc4cc(ccc4)C5)cccc6)cccc7	training set	non-inhibitor
11114294	S(c1nc(ccc1C(=O)c2sccc2)C(C)C)CCCCCCCCNC	training set	inhibitor
11114296	S(=O)(=O)(NCCN3CCC(COC(=O)c1c2c([nH]c1OC)ccc(c2)F)CC3)C	training set	non-inhibitor
14720752	O=C(O)CNC1=NC3(Cc2c1cccc2)CCCC3	training set	non-inhibitor
14721838	S=C(N2CCC(NC(=O)C1CCCCC1)CC2)NCC	training set	non-inhibitor
14721848	s1c(ccc1)CNC(=O)CN3c2c(ccc(c2)C)OC(C3=O)C	training set	inhibitor
14721850	O=C(NC1CCCC1)C(N(C(=O)CCC(=O)Nc2noc(c2)C)CC(=O)OCC)c3cnccc3	training set	non-inhibitor
14721852	O=C(N1C2CC(NC(=O)C)CC1CCC2)Nc3ccccc3	training set	non-inhibitor
14721868	S(c1nc(nc2c1cccc2)C(C)(C)C)CC(=O)Nc3ccc(cc3)N4CCOCC4	training set	non-inhibitor
14721873	S(=O)(CC(=O)Nc1c(cc(cc1)F)F)CC(=O)Nc2c(cccc2C)C	training set	non-inhibitor
14721880	n1(nnnc1C(N2CCC(CC2)C)c3ccc(cc3)C)C(CC)(C)C	training set	non-inhibitor
14721885	Fc1c(ccc(c1)F)NC(=O)c2cc(c(cc2)OC)OC	training set	inhibitor
14721893	Sc1n(nnn1)-c2cc(ccc2)C(=O)OC	training set	inhibitor
14721895	Fc1ccc(cc1)C(=O)C2CCN(CC2)C(=O)NCCC	training set	non-inhibitor
14721904	O4c1c(cccc1)N(CC(=O)N3c2c(cccc2)CC3C)C(=O)C4	training set	non-inhibitor
14721907	O=C(N1CC(C(=O)NC(CC)C)CCC1)NC2CCCCC2	training set	non-inhibitor
14721914	O=C1N(C(=O)N(C(=O)C1=CNCCCCCC)C)C	training set	inhibitor
14721957	N2(c1c(cccc1)C(=N)C(=C2CCCC)CCC)C	training set	inhibitor
14721971	O=C1C3(CN2C(N(CC1(C2)C(C)C)C3)c4occc4)C(C)C	training set	non-inhibitor
14722077	Clc1ncccc1-c2oc(cc2)C{E}=C(NC(=O)c3c(cccc3)C)C(=O)NCCCN4CCN(CC4)C	training set	non-inhibitor
14722102	O=C(NC({Z}=Cc1[nH]ccc1)C(=O)NCCCN(CC)CC)c2ccccc2	training set	non-inhibitor
14722117	S(c1n(nnn1)CCCC)CC(=O)N2CCCC2	training set	non-inhibitor
14722127	S(c1oc(nn1)CNc2ccc(cc2)F)CC(=O)N(CC)CC	training set	non-inhibitor
14722144	OC1=C(C(N(C1=O)CCCN2CCOCC2)c3ccncc3)C(=O)c4cc(ccc4)OC	training set	non-inhibitor
14722149	s4c1c(n(c(c1)C(=O)OCC)CCCN3C(=O)c2c(cccc2)C3=O)cc4C	training set	inhibitor
14722164	S(c1nc2c([nH]1)cccc2)Cc3nccc(c3C)OCC(F)(F)F	training set	inhibitor
14722171	O(C(c1ccncc1)C(=O)NC2CCCC2)C(=O)C4=Cc3c(cccc3)OC4	training set	inhibitor
14722183	s1c(nnc1C)N2C(C(=C(O)C2=O)C(=O)c3occc3)c4ccc(cc4)C	training set	non-inhibitor
14722192	Clc1ccc(cc1)CCNc2sc3c(n2)cccc3	training set	inhibitor
14722193	O=C(Nn1c(ccc1C)C)c2ccccc2	training set	non-inhibitor
14722198	O=C3N(c1c(ccc(c1)C(=O)N)N2CCCCC2)C(=O)C4C3CC=CC4	training set	non-inhibitor
14722202	O=C(Nc1c(cccc1)-c2ccccc2)C(NC3CCCC3)C	training set	non-inhibitor
14722207	Clc1ccc(cc1)N3CCN(C(=O)CSC2=NCCS2)CC3	training set	inhibitor
14722468	Oc1nc5c(cc1C(N(Cc2occc2)CC3OCCC3)c4n(nnn4)C(C)(C)C)cc(c(c5)C)C	training set	non-inhibitor
14722620	Fc1ccc(cc1)Cn2nnnc2CN(Cc3c(nc4c(c3)c(cc(c4)C)C)O)C5CCCC5	training set	inhibitor
14722623	S(=O)(=O)(Nc1onc(c1C)C)c2ccc(cc2)NC{Z}=CC(=O)c3cc4c(cc3)OCO4	training set	non-inhibitor
14722628	Oc1nc3c(cc1CN(C(=O)NC2CCCCC2)CCCN(CC)CC)ccc(c3C)C	training set	non-inhibitor
14722637	S(c1n(c(nn1)-c2ccc(cc2)O)CC3OCCC3)CC(=O)c4cc(c(cc4)NC(=O)CC)OC	training set	non-inhibitor
14722641	O6c2c(cc1nc(c(cc1c2)CN(Cc3n(nnn3)Cc4occc4)Cc5c(cccc5)OC)O)OCC6	training set	inhibitor
14722649	Clc1ccc(cc1)S(=O)(=O)NCC(=O)N(CC2OCCC2)CC(=O)NCCc3ccccc3	training set	non-inhibitor
14722656	S(=O)(=O)(N3CCN(c1nc2c(cc1C#N)cc(cc2)C)CC3)c4cc5c(cc4)OCCO5	training set	non-inhibitor
14722657	O5c2c(cc1nc(c(cc1c2)CN(C(c3n(nnn3)C(CC)(C)C)C(C)C)Cc4occc4)O)OC5	training set	inhibitor
14722887	Clc1cc(ccc1)Cn2nnc3c2nc(nc3O)C(=O)NCc4occc4	training set	non-inhibitor
14722895	S(=O)(=O)(N2CC3C1=CC=CC(=O)N1CC(C2)C3)c4ccc(cc4)C(C)(C)C	training set	non-inhibitor
14722903	S(=O)(=O)(N2C(c1cnccc1)CCCC2)c3ccccc3	training set	non-inhibitor
14722911	S(=O)(=O)(N1CCN(CC1)c2ccc(cc2)F)c3ccc(cc3)NC(=O)CC	training set	non-inhibitor
14722923	s1c(ccc1)-c2n(c(cc2)CCC(=O)O)-c3ccc(cc3)C(=O)C	training set	inhibitor
14722924	S(=O)(=O)(N(c1ccc(cc1)C(=O)NCc2ncccc2)C)C	training set	non-inhibitor
14722936	Oc2n1ncnc1nc(c2NC(=O)CC43CC5CC(C3)CC(C4)C5)C	training set	non-inhibitor
14722950	Oc2n1ncc(c1nc(c2Cc3ccccc3)C)C#N	training set	non-inhibitor
14722958	O=C(Nc1ccc(cc1)C)c2c(ccc(c2)NC(=O)CCC(=O)O)N3CCCCC3	training set	non-inhibitor
14723060	S(c2nc1nc(cc(c1c(n2)O)C)C)CC(=O)Nc3cc(ccc3)C	training set	inhibitor
14723141	S(=O)(=O)(N(CC)CC)c1c3c2c(cc1)SC(=O)c2ccc3	training set	inhibitor
14723143	S(=O)(=O)(N2CCC(NC(=O)Cc1ccccc1)CC2)c3ccc(cc3)C(=O)O	training set	non-inhibitor
14723152	Oc1n(c(nc1)Nc2nc(cc(n2)C)C)-c3ccccc3	training set	inhibitor
14723155	S(=O)(=O)(N1CCN(CC1)C)c2ccc(cc2)C(=O)OCC	training set	non-inhibitor
14723166	S(=O)(=O)(N1CCC(CC1)C(=O)NCCc2ccccc2)c3c(ccc(c3)OC)OC	training set	non-inhibitor
14723179	S(=O)(=O)(N1CCC(CC1)C(=O)NCc2cnccc2)c3ccc(cc3)C	training set	non-inhibitor
14723183	S(=O)(=O)(N3CCC(c1onc(n1)-c2ccc(cc2)N(C)C)CC3)c4cc(ccc4)C(=O)O	training set	non-inhibitor
14723186	S(=O)(=O)(N(c1cc2c(cc1)OCO2)CC(=O)N(C)C)C	training set	non-inhibitor
14723188	S(=O)(=O)(N3c1c(cc(cc1)-c2nc(sc2)NC(=O)CCC)CC3)C	training set	non-inhibitor
14723193	Oc1c(cccc1OC)C(N2N=C(CC2(C)C)C)C#N	training set	non-inhibitor
14723195	Oc1nc2c(nc1CCC(=O)OCC(=O)C)cccc2	training set	inhibitor
14723197	S(=O)(=O)(NC(CC)C)c1ccc(cc1)OCC(=O)NCC2OCCC2	training set	non-inhibitor
14723377	S(=O)(=O)(N1CCOCC1)c2ccc(cc2)-c3nc(on3)C5CCN(C(=O)c4cc(ccc4)C)CC5	training set	non-inhibitor
14723383	O=C1N(CC(C1)C(=O)O)CCCN(C)C	training set	non-inhibitor
14723427	O=C(O)c1c2n(nc1)c(c(cn2)C(=O)C)C	training set	non-inhibitor
14723549	s1c(c(c(c1C)C)C(=O)NCCN(C)C)NC(=O)c2ccccc2	training set	inhibitor
14723680	O=C(NC1CC2N(C(C1)CCC2)Cc3ccccc3)Nc4ccc(cc4)OC	training set	non-inhibitor
14723684	o1c(nnc1-c2cnccc2)-c3ccc(cc3)OC	training set	inhibitor
14723694	o1c(nnc1-c2ccccc2)-c3c4c(n(c3)C)cccc4	training set	inhibitor
14723699	S(c1n(c(nn1)-c2c(cccc2)OC)-c3ccc(cc3)C)CC(=O)OC	training set	non-inhibitor
14723709	Clc1ccc(cc1)-c2onc(n2)-c3c(cccc3)C	training set	inhibitor
14723715	Clc1cc(ccc1)NC(=O)CSc2oc(nn2)Cn3nnc4c3cccc4	training set	inhibitor
14723719	O5c1c(ccc(c1)CNc2n4c(nc2-c3ccccc3)cccc4)OC5	training set	inhibitor
14723721	O(C(=O)c1nc(ccc1)C(=O)Oc2ccc(cc2)C)c3ccc(cc3)C	training set	non-inhibitor
14723723	Clc1c(cccc1)C(N2CCC(CC2)C(=O)N)c3n(nnn3)Cc4ccc(cc4)OC	training set	non-inhibitor
14723726	Clc1ccc(cc1)NCc2n(c(nn2)SCC(=O)OC)-c3ccccc3	training set	inhibitor
14723734	S(c1n(c(nn1)-c2ccccc2)Cc3occc3)CC(=O)Nc4noc(c4)C	training set	non-inhibitor
14723741	s2c1nc(nc(c1c3c2CC(CC3)C)N4CCN(CC4)C(=O)C)C	training set	inhibitor
14723746	s1nnc(c1)C(=O)N(C(c2ccncc2)C(=O)NCc3ccccc3)C4CC4	training set	non-inhibitor
14723750	S(c1n(c(nn1)C)-c2cc(ccc2)OC)CC(=O)OC	training set	non-inhibitor
14723764	Fc1ccc(cc1)C(=O)C2CCN(CC2)CC(=O)Nc3c(cccc3)OC	training set	non-inhibitor
14723766	o1c(ccc1)C2N(C(=O)C(=C2C(=O)c3cc(ccc3)OC)O)Cc4cnccc4	training set	non-inhibitor
14723778	O=C(NCc1ccc(cc1)C)C3N(C(=O)NCc2ccccc2)CCC3	training set	non-inhibitor
14723786	S(c1n(c(nn1)-c2ccncc2)Cc3ccccc3)CC(=O)Nc4sccn4	training set	inhibitor
14723793	Clc2cc1nc(oc1cc2)-c3cnccc3	training set	inhibitor
14723800	S(c1n(c2c(n1)cccc2)CC(=O)NC3CCCC3)CC(=O)N5Cc4c(cccc4)CC5	training set	non-inhibitor
14723815	S(c1n(c2c(n1)cccc2)CC(=O)N3CCOCC3)Cc4ccccc4	training set	non-inhibitor
14723822	Clc1cc(ccc1)-c2oc(cc2)C(=O)Nc3nn(nn3)CCC	training set	inhibitor
14723823	Fc1cc(ccc1)-c2c5c(nc3c2C(=O)N(C(=O)N3C)C)-c4c(cccc4)C5O	training set	non-inhibitor
14723841	O=C(N2Cc1c(cccc1)CC2)Cn3nc(nn3)-c4c(cccc4)NC(=O)CC(C)C	training set	non-inhibitor
14723854	Fc1c(cccc1)C(=O)c2c3c(n(c2)CC(=O)OCC)cccc3	training set	inhibitor
14723857	o1c(ccc1CNC(CC)C)C(=O)OC	training set	non-inhibitor
14723860	s1c(ccc1)C(=O)N3CCC(C(=O)Nc2c(cc(cc2)OC)OC)CC3	training set	non-inhibitor
14723867	n1c([nH]c2c1cccc2)-c3c(n[nH]c3-c4ccccc4)-c5ccccc5	training set	inhibitor
14723880	S(c1n(c(nn1)CC(=O)Nc2ccc(cc2)C)CC)CC(=O)Nc3scc(n3)C	training set	non-inhibitor
14723887	O=C(Nc1ncccc1C)Nc2ccc(cc2)C	training set	inhibitor
14723892	OCCNc1c2c(nc(c1)C)cccc2	training set	non-inhibitor
14723902	n1(c3c(c2c1cccc2)CN(CC3)C)C	training set	inhibitor
14723909	O2CCN(C(=O)Nc1ccccc1)CC2	training set	non-inhibitor
14723910	o1c(ccc1COc2ccccc2)C(=O)Nc3ccc(cc3)OC	training set	inhibitor
14723914	O2c1c(cccc1)C(=CC2=O)NCCCC	training set	inhibitor
14723934	O=C2c1c(nc(nc1)N)CC(C2)(C)C	training set	non-inhibitor
14723935	s1c(nnc1CCC)NC(=O)c2sccc2	training set	inhibitor
14723948	Clc2cc1nc([nH]c1cc2)NCCCl	training set	inhibitor
14723961	S(CC(=O)Nc1noc(c1)C)CCO	training set	non-inhibitor
14723987	s1c2c(nc1NC(=O)C)ccc(c2)OC	training set	inhibitor
14724005	N2=C(c1c(cccc1)CC2(C)C)C	training set	non-inhibitor
14724007	S2C(=S)N(C(=O)c1ccccc1)CC2	training set	inhibitor
14724018	O(c1ccc(cc1)C{E}=Cc2ccncc2)C	training set	inhibitor
14724019	O=C(Nc1ccc(cc1)N2CCN(CC2)C(=O)C)c3ccc(cc3)C	training set	non-inhibitor
14724025	O=C(NCCCC)C1CCN(CC1)Cc2ncccc2	training set	non-inhibitor
14724032	S(c1n(c(nn1)CCC)CCCOC)CC(=O)N2CCCCC2	training set	non-inhibitor
14724035	ClC(Cl)(Cl)C(P(=O)(OCC)OCC)NC(=O)C	training set	non-inhibitor
14724038	S(c1n(c(nn1)CCC)CCCOC)CC(=O)N2C(CCCC2)C	training set	non-inhibitor
14724045	S(c1n(c(nn1)C2CCCCC2)CC)CC(=O)OC	training set	non-inhibitor
14724053	ClC(Cl)(Cl)C(P(=O)(OCC)OCC)NC(=O)C(Cl)Cl	training set	non-inhibitor
14724056	Clc1c(cccc1)CN(C(=O)c2oc(cc2)CN3CCOCC3)CC(=O)NCC4OCCC4	training set	non-inhibitor
14724066	S(c1nc(sn1)N)Cc2c(cccc2)C	training set	inhibitor
14724074	O1CCN(CC(=O)N)CCOCCOCCOCCOCC1	training set	non-inhibitor
14724089	N1(C3=C(C(=N)C2=C1CCC2)CCC3)CCCCCCCCCC	training set	inhibitor
14724093	O1CCN(CC1)CCCNCc2ccncc2	training set	non-inhibitor
14724095	O(c1nc(nc(n1)NCCN2CCOCC2)Nc3ccc(cc3)C)CC	training set	non-inhibitor
14724099	N(c1ccc(cc1)N)(c2ccc(cc2)N)c3ccccc3	training set	inhibitor
14724100	O=C(NC1CCCC1)CC(c2ccccc2)C	training set	non-inhibitor
14724107	O(c1ccc(cc1)-c2nc(nc(n2)N)N)c3c(cccc3)C	training set	inhibitor
14724111	S(c1n(c(nn1)-c2occc2)-c3ccccc3)CC(=O)NCc4occc4	training set	non-inhibitor
14724116	n1(nc(cc1C)C)-c2nc(nc(n2)Nc3c(cccc3)C)-n4nc(cc4C)C	training set	non-inhibitor
14724121	s1c2c(c(c1NC(=O)C)C(=O)OCC)cccc2OC	training set	inhibitor
14724123	O=C(c1c2c([nH]c1)cccc2)Cn3nc(nn3)-c4ccc(cc4)OCCCC	training set	non-inhibitor
14724126	Clc2cn1c(c(nc1cc2)-c3ccccc3)NCC(=O)OCC	training set	inhibitor
14724132	O=C1NC(Cc2c1ccc3c2cccc3)(C)C	training set	inhibitor
14724134	S(c1n(c(nn1)CSc2nc(cc(n2)C)C)Cc3occc3)CC(=O)N	training set	non-inhibitor
14724135	S(c1nc(cc(n1)-c2ccccc2)C(F)(F)F)C(C(=O)N3CCCCC3)C	training set	inhibitor
14724140	O=C1NC(=O)N(c2nc(n(c21)CC(O)COc3c(cccc3)C)NCc4ccccc4)C	training set	non-inhibitor
14724144	OC1=C(C(=O)CC(C1C(=O)OC)(C)C)C{E}=NCc2ccccc2	training set	non-inhibitor
14724154	O=C(N1CCOCC1)c2cc(ccc2)NC(=O)c3ccccc3	training set	non-inhibitor
14724155	Clc1ccc(cc1)CSc2oc(nn2)-c3cnccc3	training set	inhibitor
14724160	FC(F)(F)c2n1nc(cc1nc(c2)-c3occc3)C(=O)Nc4nn(cc4)Cc5ccc(cc5)C	training set	non-inhibitor
14724163	S(c1nc(c(cn1)C(=O)OCC)N)CCc2ccccc2	training set	inhibitor
14724164	Clc1c(cccc1)C(NC=O)C(=O)Nc2c(cccc2C)C	training set	non-inhibitor
14724662	s2c1ncnc(c1c3c2CCCC3)SCC(=O)c4ccc(cc4)C	training set	inhibitor
14725795	s1c3c(c2c1CCC2)C(=O)N(C(=N3)SCc4oc(nn4)-c5ccccc5)CCCOC	training set	inhibitor
14725960	O=C1C2(CN(CC1(CN(C2)C)CC(=O)OC(C)C)C)CC(=O)OC(C)C	training set	non-inhibitor
14725994	Clc1cc(ccc1)C(=O)Nc2nn(nn2)CCC	training set	inhibitor
14725997	S(c1nc2c(cc1C#N)CCCC2)C3C(O)CCCC3	training set	inhibitor
14726000	O(c1ccc(cc1)CC(=O)NCCN2CCCC2)C	training set	non-inhibitor
14726014	O=C(Nc1ccc(cc1)N2CCN(CC2)C(=O)CCC)C(C)(C)C	training set	non-inhibitor
14726029	Clc1ncccc1C(=O)Nc2cc3c(cc2)OC(=O)C=C3	training set	non-inhibitor
14726031	s1c(nnc1C(C)C)NC(=O)C=C(C)C	training set	inhibitor
14726036	S(c1n(nnn1)-c2ccc(cc2)C(=O)C)CC(=O)Nc3cc(ccc3)NC(=O)c4occc4	training set	inhibitor
14726040	OC1(CC2N(C(C1)CC2)C(=O)Nc3c(cccc3)C)c4cnccc4	training set	non-inhibitor
14726047	Clc1ccc(cc1)C(=O)n2nc(nc2N)-c3occc3	training set	inhibitor
14726050	O3c1c(ccc(c1)C(=O)NC2CC(NC(C2)(C)C)(C)C)OC3	training set	non-inhibitor
14726060	s1c(nnc1-c2ccncc2)N(C(=O)c3cc(ccc3)OC)C	training set	inhibitor
14726064	o1c(ccc1)CN(Cc2n(nnn2)C3CCCC3)Cc4ccc(cc4)C(C)(C)C	training set	non-inhibitor
14726066	Clc1cc(ccc1)C(c3n2ncnc2nc(c3)C)C#N	training set	inhibitor
14726067	Clc1ccc(cc1)CN3C(C52OC(C(C2C3=O)C(=O)Nc4noc(c4)C)(C=C5)C)C(=O)NC(C)(C)C	training set	non-inhibitor
14726071	O=C(N2CCN(c1ccccc1)CC2)N3CCOCC3	training set	non-inhibitor
14726076	S(c1n(nnn1)CC)CC(=O)c2cc3c(cc2)OCCO3	training set	inhibitor
14726080	O(c1ccc(cc1)CCNc3n2ncnc2nc(c3)-c4ccccc4)C	training set	inhibitor
14726082	o1c(ccc1)CN(C(c2n(nnn2)C(C)(C)C)c3cnccc3)Cc4ccccc4	training set	non-inhibitor
14726089	Clc1c(c(ccc1)Cl)-c2noc(c2C(=O)N4Cc3c(cccc3)CC4)C	training set	non-inhibitor
14726091	s1c(nnc1COC)NC(=O)CC(c2ccccc2)c3ccccc3	training set	non-inhibitor
14726094	s1c(nnc1N(C(=O)C)C)-c2nccnc2	training set	inhibitor
14726099	O(c1c(cccc1)C2=NN(C(=O)C=C2)CC(=O)NCCCOC)C	training set	non-inhibitor
14726105	Clc1c(c(ccc1)F)Cn2nnc(c2)C(=O)NCCOC	training set	non-inhibitor
14726108	s1c(nnc1)NC(=O)CCc2ccccc2	training set	inhibitor
14726114	S1C(=NCC1)Nc2nc(cc(n2)C)C	training set	inhibitor
14726117	O=C(Nc1cnc(cc1)NC(=O)C(C)C)c2cnccc2	training set	non-inhibitor
14726277	Clc1c(cc(c(c1)C(=O)OC)OC)NC(=O)c2oc3c(c2)cccc3	training set	non-inhibitor
14726294	Clc2c(c1ncccc1c(c2)Cl)OC(=O)N3CCC(CC3)C	training set	inhibitor
14726295	o1c(c(cc1)C(=O)NCc2ccccc2)C	training set	non-inhibitor
14726306	O3c1c(ccc(c1)NC(=O)c2occc2)OC3(C)C	training set	inhibitor
14726317	Clc1ccc(cc1)-c2nc(sc2)NCC=C	training set	inhibitor
14726321	s1c(c(cc1C)C2C3=C(OC(=C2C#N)N)CC(CC3=O)(C)C)C	training set	non-inhibitor
14726324	O=C1N(C(=O)c3c2c1cccc2ccc3)CCCC(=O)N5Cc4c(cccc4)CC5	training set	inhibitor
14726326	O(C1=NN(C(=O)C=C1)c2ccccc2)c3nc(nc(n3)NC(C)C)NC(C)(C)C	training set	non-inhibitor
14726341	s1c(nc(c1)-c2ccccc2)C(=C3CCCC3)C#N	training set	inhibitor
14726347	Fc1ccc(cc1)NC(=O)Nc2noc(c2)C	training set	inhibitor
14726350	O2CCN(c1nc(nc(n1)C#N)N(C)C)CC2	training set	inhibitor
14726357	Clc1c(ccc(c1)Cl)-c2oc(nn2)SC	training set	inhibitor
14726366	O4c1c(ccc(c1)OCC(=O)N3c2c(cccc2)CC3)C(=CC4=O)CCC	training set	non-inhibitor
14726376	O3CCN(c1nc(nc(n1)NCCO)NCCC2=CCCCC2)CC3	training set	inhibitor
14726385	O=C(N2C(C(=O)Nc1ccccc1)CCC2)Nc3ccc(cc3)OC	training set	non-inhibitor
14726400	Clc1cc(c(cc1)OC)NC(=O)C3CN(c2nc(cc(n2)C)OC)CCC3	training set	inhibitor
14726413	FC(F)(F)c1cc(ccc1)-c2oc(cc2)C(=O)NC(C)C	training set	inhibitor
14726415	FC(F)(F)c1cc(ccc1)-c2nn(nn2)CC(=O)N(C3CCCCC3)C	training set	non-inhibitor
14726423	s1c(ccc1)CN2C(=NCC2=O)Nc3ccc(cc3)OCC	training set	inhibitor
14726446	O=C(c1c3c(n(c1)CC(=O)Nc2c(cccc2C)C)cccc3)C	training set	non-inhibitor
14726691	s2c1ncnc(c1c(c2)-c3ccc(cc3)C)NCCN4CCOCC4	training set	inhibitor
14726702	O=C(N1CCC(CC1)C(=O)OCC)C32CC4CC(C2)CC(C3)C4	training set	non-inhibitor
14726726	Brc1cc(ccc1)C2=NOC(C2)C(=O)NCc3cc4c(cc3)OCO4	training set	inhibitor
14727019	ClC1=CC(=O)Oc2c1ccc(c2)N(CC)CC	training set	inhibitor
14727054	[O-][N+](=O)c1nc(n(c1N2CCN(CC2)C)Cc3ccccc3)C	training set	non-inhibitor
14727060	s1c(nc(c1)-c2ccc(cc2)F)N4CCN(C(=O)c3occc3)CC4	training set	inhibitor
14727074	S(c1n(c(nc1[N+](=O)[O-])C)Cc2cc(c(cc2)OCCC)[N+](=O)[O-])CC(O)COC	training set	non-inhibitor
14727081	n1c5c(c(c2c1cccc2)-c3c4c([nH]c3)cccc4)cccc5	training set	inhibitor
14727090	O=C(Nc1c2c(ccc1)cccc2)CCC(=O)OC	training set	inhibitor
14727112	O2C(C(=O)Nc1ccc(cc1)C(=O)N)CCC2	training set	non-inhibitor
14727117	s1c(nc(c1)-c2ccc(cc2)F)N3CCN(CC3)CC(=O)N	training set	inhibitor
14727135	O4c1c(ccc(c1)NC(=O)c2c(cccc2)NC(=O)c3occc3)OC4	training set	inhibitor
14727139	o1c(ccc1[N+](=O)[O-])C{E}=CC3=Nc2c(cccc2)C(=O)N3C	training set	inhibitor
14727150	Fc1c(cccc1)C(=O)c2c4c(n(c2)CC(=O)N3CCOCC3)cccc4	training set	non-inhibitor
14727151	n1c([nH]nc1Nc2nc(cc(n2)C)C)-c3c4c(ccc3)cccc4	training set	inhibitor
14727157	s1c(nc2c1cccc2)C4=C(N(c3c(ccc(c3)OC)OC)CC4=O)N	training set	inhibitor
14727158	O3c1c(ccc(c1)NC(=O)C2(NC(=O)NCC)CCCCC2)OCC3	training set	non-inhibitor
14727164	O2c1c(cccc1)OCC2C(=O)NCc3cnccc3	training set	inhibitor
14727165	n1(nnnc1C(N2CCCCCC2)c3cc(ccc3)C#N)C4CCCC4	training set	non-inhibitor
14727179	s6c1c(n(c(c1)C(=O)N4CCN(c2sc3c(n2)cccc3)CC4)Cc5ccccc5)cc6	training set	non-inhibitor
14727180	O2C(C(=O)Nc1cnccc1)COc3c2cccc3	training set	inhibitor
14727194	Clc1ccc(cc1)CC(=O)N3CCN(C(=O)c2occc2)CC3	training set	non-inhibitor
14727199	O=C1N(C(=Nc2c1cccc2)CCC)c3ccc(cc3)OC	training set	inhibitor
14727211	S(c1n(c(nn1)CCC)CC2OCCC2)CC(=O)N3CC(CCC3)C	training set	non-inhibitor
14727215	Clc1c(ccc(c1)Cl)-c2onc(c2)C(=O)NCC3OCCC3	training set	inhibitor
14727218	o1c(ccc1COc2cc3c(cc2)CCC3)C(=O)N5CCN(C(=O)c4occc4)CC5	training set	inhibitor
14727225	n1(c(cnc1N)-c2ccccc2)C	training set	inhibitor
14727226	O(C(=O)c1ccc(cc1)NC(=O)CC2NCCNC2=O)CC	training set	non-inhibitor
14727229	Clc1c(cccc1)OCc2oc(cc2)C(=O)OCc3ncccc3	training set	inhibitor
14727237	FC(F)(F)COCc1oc(cc1)C(=O)NC2CCCCC2	training set	inhibitor
14727239	Clc1cc(ccc1)Cc2sc(nc2)NC(=O)c3sccc3	training set	inhibitor
14727242	Fc1cc(ccc1)C(=O)C2CCN(CC2)C(=O)NCCC	training set	non-inhibitor
14727244	O=C(NC1=C(CCC1)C#N)c2nn(cc2)CC	training set	inhibitor
14727246	s1c(nnc1N)C(c2ccccc2)c3ccccc3	training set	non-inhibitor
14727247	s1c(ncc1Cc2ccc(cc2)C)NC(=O)c3sccc3	training set	inhibitor
14727250	Clc1ccc(cc1)OC(=O)c2nn(cc2)CC	training set	inhibitor
14727256	O(CC(NCc1cc(ccc1)C)C)C	training set	non-inhibitor
14727260	s1c(ncc1)NC(=O)c2oc(cc2)COc3cc(c(cc3)C)C	training set	inhibitor
14727261	O(c1c(cc(cc1OC)C(=O)N3CCC(NC(=O)C(NC(=O)C)Cc2ccc(cc2)C(C)C)CC3)OC)C	training set	non-inhibitor
14727265	n1(nnnc1C(N2CCCC2)c3ccc(cc3)C#N)Cc4ccccc4	training set	non-inhibitor
14727277	s1c(ccc1)C2=NOC(=O)N2Cc3ccccc3	training set	inhibitor
14727278	Fc1cc(ccc1)C(=O)N3CCC(O)(c2cnccc2)CC3	training set	non-inhibitor
14727287	OC(c1nc2c([nH]1)ccc(c2)C)C	training set	inhibitor
14727290	Fc1ccc(cc1)CN2C(=O)C(=CC=C2)NC(=O)NC3CCCCC3	training set	inhibitor
14727291	Clc1ccc(cc1)NC(=O)N3CCC(NC(=O)C(NC(=O)C)Cc2cc(c(cc2)OC)OC)CC3	training set	non-inhibitor
14727295	O(C(=O)c2n(c1c(n(cc1)C)c2)Cc3c(ccc(c3)C)C)C(C)C	training set	inhibitor
14727304	Clc1ccc(cc1)NC(=O)C3CCN(C(=O)NC2CCCCC2)CC3	training set	non-inhibitor
14727305	o1nc(nc1C2CN(C(=O)CCCCC)CCC2)-c3ccc(cc3)OC	training set	inhibitor
14727328	s1c(nnc1C)NCc2occc2	training set	non-inhibitor
14727330	O2CCN(CCC(=O)Nc1ccccc1)CC2	training set	non-inhibitor
14729207	Clc1c(ccc(c1)Cl)CNc2nc(c(cc2C#N)C(=O)OC)C	training set	non-inhibitor
14729361	O=C(NN{Z}=Cc1n(ccc1)C)c2cnc(cc2)C	training set	inhibitor
14729399	OC1=C(C(N(C1=O)CC2OCCC2)c3cc(c(cc3)OC)OC)C(=O)c4ccc(cc4)OC	training set	non-inhibitor
14729662	O1CCNCCNCCNCC1	training set	non-inhibitor
14729727	Clc1cc(ccc1)C(=O)N3CCC(N2CC(OC(C2)C)C)CC3	training set	non-inhibitor
14729731	[O-][N+](=O)c2c(c1ncccc1c(c2)[N+](=O)[O-])Nc3c(cc(cc3)C)C	training set	inhibitor
14729949	n1(c2c(nc1)cccc2)-c3ccc(cc3)-c4nc(ncc4)-c5ccncc5	training set	inhibitor
14730114	O=C2c1n(c(nc1C(=O)c3c2cccc3)C)CC	training set	inhibitor
14730181	Clc1c(ncc(c1)C(F)(F)F)N(N3C(=O)c2c(cccc2)C(=C3)C(=O)N(C)C)C	training set	non-inhibitor
14730208	O(c1ccc(cc1)Cc2c(nc(nc2N)N)N)C	training set	non-inhibitor
14730327	Clc1c(ccc(c1)Cl)CN2N=C(C=CC2=O)C{E}=Cc3ccc(cc3)C	training set	inhibitor
14730359	S(Cc1nc2n(c1)ccc(c2)C)c3c(cccc3)N	training set	inhibitor
14730364	S(CC1=C(C(NC(=O)N1)c2c(ccc(c2)C)C)C(=O)OC)Cc3ccccc3	training set	non-inhibitor
14730458	O=C(Nc1c(cccc1)C)c3c2nc4c(nc2ccc3)cccc4	training set	inhibitor
14730500	O=C(N(c1ccccc1)CCN(C(=O)C(C)(C)C)c2ccccc2)C(C)(C)C	training set	non-inhibitor
14730508	Clc1c(cccc1)-c2n(c(nn2)SCC(=O)N3CCOCC3)N	training set	non-inhibitor
14730552	O=C(N(NC(=O)C(O)(C)C)c1cc(ccc1)C)c2ccccc2	training set	non-inhibitor
14730570	Clc1c(cccc1)Oc2n(c3c(n2)N(C(=O)N(C3=O)C)C)CCC(C)C	training set	inhibitor
14730641	Fc1c(ccc(c1)C#N)C(=O)Nc2ccc(cc2)N4CCN(C(=O)c3occc3)CC4	training set	non-inhibitor
14730697	Clc1ccc(cc1)-c2c3c(sc2)N=C4N(C3=O)CCC4	training set	inhibitor
14730875	S(=O)(=O)(NCc1ccccc1)c2cc(ccc2C)-c4nn3c(nnc3C)c5c4cccc5	training set	non-inhibitor
14730919	O(C(=O)Nc1ccc(cc1)OC)C(C)C	training set	inhibitor
14730920	Brc1cc2c(cc1)OC(=O)C3(C2C3(C(=O)c4ccc(cc4)C)C)C(=O)c5occc5	training set	non-inhibitor
14731005	O=C(Nc1ccc(cc1)N(CC)CC)c2cn(nc2)CC	training set	non-inhibitor
14731041	O(c1nc(nc(n1)OC)N(C)C)c2ccc(cc2)C{E}=NO	training set	inhibitor
14731052	O(c1ccc(cc1)NC(=O)C(=O)NCCC2=CCCCC2)CCCCC	training set	non-inhibitor
14731071	s1c(nnc1CCCCC)NC(=O)C(=O)OCC	training set	non-inhibitor
14731141	[O-][N+](=O)c2c(c1ncccc1c(c2)[N+](=O)[O-])Nc3c(ccc(c3)C)C	training set	inhibitor
14731165	S(C1=CC(=O)N(c2c1cccc2)CC)CC(=O)Nc3cc(c(c(c3)OC)OC)OC	training set	non-inhibitor
14731240	S(=O)(=O)(NCCC)c1ccc(cc1)OCC(=O)OC	training set	non-inhibitor
14731297	s1c(c(cc1)C)C2C(=C(NC(=C2C#N)SCC(=O)OCC)C)C(=O)C	training set	inhibitor
14731330	O(C(=O)c1c(ccc(c1)OC)-c2ccc(cc2)OC)C	training set	inhibitor
14731390	S(C1C(=O)N(C(=O)C1)c2ccc(cc2)[N+](=O)[O-])c3nc4c(c(n3)C)CCCC4	training set	non-inhibitor
14731425	S(=O)(=O)(N(c1ccc(cc1)OCC)C(C(=O)NC(CC)C)C)C	training set	non-inhibitor
14731453	Clc1cc(ccc1C)NC(=O)c2c(ccc(c2)N3C(=O)C4C(C3=O)CC=CC4)N5CCOCC5	training set	inhibitor
14731457	Clc1c(ccc(c1)Cl)NC(=O)COc2c(cccc2)OCC	training set	inhibitor
14731460	S(=O)(=O)(c1nc(cc(c1C#N)-c2ccccc2)-c3ccccc3)C	training set	inhibitor
14731461	O=C(Nc1ccc(cc1)C(=O)C)C3(c2ccccc2)CCOCC3	training set	non-inhibitor
14731509	O=C1N(C=Nc2c1cccc2)CCOc3ccc(cc3)C(=O)c4ccccc4	training set	non-inhibitor
14731567	S(=O)(=O)(N1C(N(CC1)C(=O)C)c2ccccc2)c3ccccc3	training set	non-inhibitor
14731586	S=C(N1C(C(=O)NCC1)CC(=O)Nc2cc3c(cc2)OCCO3)Nc4ccccc4	training set	non-inhibitor
14731682	FC(F)(F)C1(NC(=O)N(C1=O)Cc2cnccc2)NC(=O)c3ccccc3	training set	inhibitor
14731716	Brc1cc(ccc1)Cn2c4c(nc2NCC3OCCC3)N(C(=O)N(C4=O)C)C	training set	non-inhibitor
14731753	S(c1n(c(nn1)-c2ccccc2)N{E}=Cc3cc(c(cc3)OCC)OCC)C	training set	inhibitor
14731871	o1nc(cc1C)NC(=O)C{E}=Cc2ccc(cc2)C	training set	inhibitor
14731961	s1nc2c(n1)ccc(c2)NC(=O)N3CCC(CC3)C	training set	inhibitor
14731967	O(C({Z}=C([N+](=O)[O-])C{E}=Nc1ccccc1)O)CC	training set	inhibitor
14731968	s1c(ccc1)C2C4=C(N(C(=C2C#N)N)c3ccc(cc3)F)CC(CC4=O)(C)C	training set	non-inhibitor
14731985	O(C(=O)NCC(=O)NC(C(=O)NCC(=O)OC)C)Cc1ccccc1	training set	non-inhibitor
14731994	s1nc(c(c1NN{E}=Cc2cc(c(c(c2)OC)OC)OC)C#N)SC	training set	inhibitor
14732049	O=C1NC3C(NC1CC(=O)Nc2cc(cc(c2)C(=O)OC)C(=O)OC)CCCC3	training set	non-inhibitor
14732080	O=C1N(C(=O)c2c1cc(cc2)C(=O)NCc3ccccc3)CC4OCCC4	training set	non-inhibitor
14732082	Clc1c(cccc1)COC(Cn2c3c(nc2)N(C(=O)N(C3=O)C)C)COCc4c(cccc4)Cl	training set	non-inhibitor
14732159	Oc2n1nc(c(c1nc(c2CC(=O)OCC)C)-c3ccccc3)-c4ccccc4	training set	inhibitor
14732166	S(=O)(=O)(Nc1ccc(cc1)C(=O)N3CCN(c2ccccc2)CC3)C	training set	non-inhibitor
14732221	S=C2N(C(=O)c1c(cc(cc1)C(=O)NC(C)C)N2)Cc3occc3	training set	inhibitor
14732354	O(c1c(c3c(cc1)C({Z}=NOC(=O)c2c(cccc2)OC)CCC3)[N+](=O)[O-])C	training set	inhibitor
14732366	P(=O)(Oc1ccc(cc1)CC)(O)C	training set	non-inhibitor
14732429	o1c(ccc1)C(=O)Nc2c(cccc2)C(=O)NCCc3ccccc3	training set	inhibitor
14732472	s1c(c(c(c1N)C(=O)OC(C)C)C)C(=O)C	training set	inhibitor
14732542	Clc1c(c(cc(c1)Cl)Cl)S(=O)(=O)N2N(C(=O)C(=C2C)CCO)c3ccccc3	training set	inhibitor
14732562	O(C(=O)C1=C(N(C(=O)NC1c2ccc(cc2)OC)Cc3ccccc3)C)CC	training set	non-inhibitor
14732606	s1c(ccc1)C3C(n2cc(nc2)[N+](=O)[O-])C(=O)C=C(C3)c4sccc4	training set	inhibitor
14732667	Clc1c(nn(c1)C)-c2n(c(nn2)S)CC(C)C	training set	inhibitor
14732668	S(c1n(c(nn1)-c2ccncc2)N)CC(=O)N(CC)CC	training set	non-inhibitor
14732792	s1c(ccc1)C(=O)NC(c2ccc(cc2)OCC)CC(=O)OCC	training set	inhibitor
14732863	Fc1ccc(cc1)N5CCN(C(=O)c2c4c(c(nc2)Nc3ccc(cc3)OC)cccc4)CC5	training set	non-inhibitor
14732864	Brc1oc(cc1)C(=O)Nc3cc2c(nc(cc2C)N(CC)CC)cc3	training set	inhibitor
14732899	s1nnnc1Nc2ccc(cc2)C	training set	inhibitor
14732917	Clc1c(cccc1)NC(=O)c2n[nH]cc2	training set	inhibitor
14732936	Fc1ccc(cc1)Oc2nc(cc(c2C#N)C)C	training set	inhibitor
14732937	Clc1c(ccc(c1)NC(=O)CSCC(=O)Nc2ccc(cc2)C)N3CCOCC3	training set	non-inhibitor
14732941	Clc1cc(c(cc1)OC)NC(=O)NCCCl	training set	inhibitor
14732943	s1nc(c(c1SC)C(=O)Nc2ccc(cc2)C)SC	training set	inhibitor
14733073	Clc1cc(ccc1Cl)-c2nc(sc2)-n3nc(cc3C)C	training set	inhibitor
14733262	s1c(ccc1C)C(=O)c2c(cccc2)C(=O)O	training set	non-inhibitor
14733574	Clc1c(c(ccc1)F)C2SCC(=O)N2c3ccc(cc3)NC(=O)C	training set	non-inhibitor
14733825	Clc1ccc(cc1)COC(=O)CCc2oc(c(n2)-c3ccccc3)-c4ccccc4	training set	inhibitor
14733896	O2c1c(ccc(c1)OC)C(=O)C(=C2)Oc3c(cccc3)OCC	training set	inhibitor
14733907	O=C(NC(Cc1ccccc1)C(=O)O)c2ccc(cc2)C(C)(C)C	training set	non-inhibitor
14733929	S(=O)(=O)(N(c1ccc(cc1)F)CC(=O)NCC2OCCC2)c3cc(c(cc3)OC)OC	training set	non-inhibitor
14733939	S(=O)(=O)(N2CCC(C(=O)Nc1ccc(cc1)C)CC2)C	training set	non-inhibitor
14734020	FC(F)(F)c1nc(nc(c1)-c2cc(c(cc2)OC)OC)N3CCN(CC3)C	training set	inhibitor
14734050	s1c(ccc1)C(=O)Nc2ccc(cc2)N3CCN(CC3)C(=O)CC	training set	non-inhibitor
14734084	O1C(=C(C(=CC1=O)C)C(=O)NCc2cnccc2)C	training set	inhibitor
14734086	O=C(NCC(CN1CCC(CC1)C)C)c2c4c(nc(c2)-c3ncccc3)cccc4	training set	non-inhibitor
14734105	Clc1ccc(cc1)NC(=O)c2n(ncc2)C	training set	inhibitor
14734123	O1C4(OCC1)CCN(C(=O)C2CN(C(=O)C2)C3CCCC3)CC4	training set	non-inhibitor
14734155	S1C({E}=C(CCCCCC)C)C(=O)NC1=S	training set	inhibitor
14734157	Clc1cc2c(cc1Cl)NC(=O)N(N2O)c3cc(c(cc3)Cl)Cl	training set	non-inhibitor
14734162	O2C(=NC({Z}=Cc1cc(c(cc1)OC)OC)C2=O)c3c(noc3C)-c4ccccc4	training set	inhibitor
14734164	O=C(NN=C1CCC(CC1)C)Cc2ccccc2	training set	non-inhibitor
14734231	S=C2N(C(=O)c1c(cc(c(c1)OCC)OCC)N2)CCC(=O)N4Cc3c(cccc3)CC4	training set	non-inhibitor
14734242	S=C2N(C(=O)c1c(cccc1)N2)CCCCCC(=O)NCCOC	training set	inhibitor
14734278	S=C2N(C(=O)c1c(cccc1)N2)CCC(=O)NCCCN3CCOCC3	training set	non-inhibitor
14734355	O(c1c(cccc1)CC(=O)N(CCCC)CC)C	training set	inhibitor
14734381	Clc1c(ccc(c1)CNC(C)(C)C)OC	training set	non-inhibitor
14734431	O(C(=O)c1c(cccc1)NC(=O)OCCCC)C	training set	inhibitor
14734435	O1C3(OC(=C(C1=O)C{E}=Nc2cc(ccc2)C(=O)C)O)CCCCC3	training set	inhibitor
14734448	O=C(Nc2cc1nc3n(c1cc2)CCN(C3)C4CCCCC4)NC5CCCCC5	training set	non-inhibitor
14734490	Clc1c(cc(cc1)Cl)OCc2oc(cc2)C(=O)Nc3cnccc3	training set	inhibitor
14734511	Brc1cc(c(cc1)OC)C(=O)Nc2cc(cc(c2)C)C	training set	inhibitor
14734512	S(c1n(nnn1)C)CC(=O)NC2=C(N(N(C2=O)c3ccccc3)C)C	training set	non-inhibitor
14734576	O(c1ccccc1)CCC(=O)Nc2ccccc2	training set	inhibitor
14734579	Clc1ccc(cc1)NC(=O)Nc2cc(ccc2)SC	training set	inhibitor
14734624	O=C(Nc1ccc(cc1)C(=O)OC)C2C(C(=O)O)CCCC2	training set	non-inhibitor
14734710	S(=O)(=O)(N(c1ccc(cc1)C(=O)NC2C3CC(C2)CC3)C)C	training set	non-inhibitor
14734767	N(c1c(c(ncc1)N(C)C)C#N)(Cc2ccccc2)Cc3ccccc3	training set	inhibitor
14734770	O(C1CCC(C(C)(C)C)CC1)CC(O)CN3CCN(c2ccccc2)CC3	training set	non-inhibitor
14734775	o1nc(c(n1)NC(=O)c2ccccc2)-c3n(c4c(n3)cccc4)CC	training set	inhibitor
14734802	S(=O)(=O)(c1ccc(cc1)C)CC#CCOC(=O)c2ccc(cc2)[N+](=O)[O-]	training set	inhibitor
14734804	Clc1c(ccc(c1)NC(=O)OCCCC)C	training set	inhibitor
14734842	Clc1c(cccc1)-c2noc(c2C(=O)Nc3sc(nn3)Cc4ccc(cc4)Cl)C	training set	non-inhibitor
14734880	O=C1N(C(Nc2c1cccc2)c3cc(c(cc3)OC)COc4ccc(cc4)[N+](=O)[O-])Cc5occc5	training set	non-inhibitor
14734949	Brc1oc(cc1)C(=O)Nc2c(ccc(c2)C(F)(F)F)N3CCCCC3	training set	inhibitor
14734950	O=C1N(C(=O)CC1n2c3c(nc2)cc(c(c3)C)C)C	training set	non-inhibitor
14734961	o1c(ccc1)-c2n(c3c(n2)cccc3)CCOc4cc(ccc4)C	training set	inhibitor
14734985	n1(ncc(c1N{E}=CN2CCCCCC2)C#N)C	training set	inhibitor
14734991	O=C(N1CCOCC1)c2c(cccc2)N(C(=O)OC)C	training set	non-inhibitor
14735007	Clc1ccc(cc1)-c3n2nc(ccc2nn3)-n4ncc(c4)C	training set	inhibitor
14735016	O2c1c(ccc(c1)OCC(=O)C)C(=C(C2=O)C)C	training set	inhibitor
14735049	Brc1cc(c(cc1)Cl)C(=O)Nc2c(cccc2)N4CCN(C(=O)c3ccc(cc3)Cl)CC4	training set	non-inhibitor
14735081	Clc1c(c(ccc1)Cl)COc2c(cc(cc2)CNn3nnnc3N)OC	training set	inhibitor
14735091	O(c1cc(ccc1)NC(=O)c2ccc(cc2)C)CC(=O)OC	training set	inhibitor
14735103	S=C1NCCOCCOCCOCCN1	training set	non-inhibitor
14735111	O(N{Z}=C2c1c(c(c(cc1)OC)[N+](=O)[O-])CCC2)C(=O)c3c4c(ccc3)cccc4	training set	inhibitor
14735114	n1(c(c(cc1C)C{E}=Nn2cnnc2)C)-c3cc(ccc3)C	training set	inhibitor
14735175	S=C1N(C(=C(C(=N1)N2CCC(CC2)C(=O)N)C(=O)C)C)c3ccccc3	training set	non-inhibitor
14735180	s1c(ccc1)CNC(=S)Nc2ccc(cc2)CCCC	training set	inhibitor
14735188	FC(F)(F)C1(NC(=O)NC2=C1C(=O)NC(=O)N2c3ccc(cc3)C)C(F)(F)F	training set	non-inhibitor
14735228	Clc1ccc(cc1)Cc3c(n2ncc(c2nc3C)C(=O)N4CCOCC4)C	training set	inhibitor
14735239	S4c1c(cc(cc1)C(=O)N3CCC2(OCCO2)CC3)N(C(=O)c5c4cccc5)CC=C	training set	non-inhibitor
14735293	O=C1N(C(C(C1)C(=O)NCCCC)c2ccc(cc2)OC)c3ccc(cc3)OC	training set	non-inhibitor
14735328	Clc1cc(c(cc1)OCC(=O)NCc2ccncc2)C	training set	inhibitor
14735333	Clc1c(ccc(c1)Cl)C3N(OCc2ccccc2)C(=O)CN3C(=O)C	training set	non-inhibitor
14735335	O(c1cc3c(cc1)-c2c(cc(cc2)OC)C3=NN)C	training set	inhibitor
14735338	O=C(Nc1ccc(cc1)N2CCCCC2)C	training set	inhibitor
14735343	s1c([n+](c(c1)-c2ccc(cc2)C)CC=C)NNC(=O)Nc3ccccc3	training set	inhibitor
14735444	FC(F)(F)c1nc(nc(c1)-c2ccccc2)N3CCN(CC3)C	training set	inhibitor
14735445	O=C(N1CCN(CC1)Cc2ccccc2)c3c5c(c(nc3)Nc4ccc(cc4)OC)cccc5	training set	non-inhibitor
14735455	O=C2N(NC(=O)c1cc(ccc1)OC)C=C(c3c2cccc3)C(=O)OC	training set	non-inhibitor
14735459	Clc1cc(ccc1Cl)N3C(O)(c2c(cccc2)NC3=O)C(=O)NCc4cc5c(cc4)OCO5	training set	non-inhibitor
14735491	s1c(c(nc1NC(=O)C)-c2ccccc2)C(=O)OCC	training set	inhibitor
14735496	Brc1ccc(cc1)OC(=O)c2nc(ccc2)C(=O)OC(C)C	training set	non-inhibitor
14735504	Brc3cc1c(cc(cc1)OC(=O)c2cnccc2)cc3	training set	inhibitor
14735678	O=C(Nc1c(cc(cc1)C)C)C({Z}=Cc2cc(ccc2)[N+](=O)[O-])NC(=O)C3CCCCC3	training set	non-inhibitor
14735681	o1c(ccc1C{Z}=NNC(=O)OCC)[N+](=O)[O-]	training set	inhibitor
14735687	O=C1N(C(=O)C2C3C4(C(C21)C=C3)CC4)c5c(ccc(c5)C(=O)C)OCC	training set	non-inhibitor
14735690	O4c1c(c2c(cc1)cccc2)C=C(NC(=O)c3c(cccc3)OC)C4=O	training set	inhibitor
14735717	O(c1c(cc(cc1)C)C)CC(=O)NN{Z}=Cc2occc2	training set	inhibitor
14735723	OC1(C(=C)[N+]2(CCC1CC2)C)c3ccccc3	training set	non-inhibitor
14735802	s1c(ccc1)C{E}=NC32CN4CN(C2)CN(C3)C4	training set	non-inhibitor
14735967	O5c1c(ccc(c1C)OCC(=O)N3Cc2c(cccc2)CC3)-c4c(cc(cc4)OC)C5=O	training set	inhibitor
14736007	O(CCn1c3c(c(c1C)C{E}=Nn2cnnc2)cccc3)c4ccc(cc4)OC	training set	inhibitor
14736080	O=C(n1nc(nc1N)-c2cnccc2)CCC	training set	inhibitor
14736170	S(=O)(=O)(NCCN1CCOCC1)c2cc(ccc2C)-c4nn3c(nnc3C)c5c4cccc5	training set	non-inhibitor
14736430	S=C2N(C(=O)C({Z}=Cc1cc(c(c(c1)OC)OC)OC)N2CC(=O)OC)c3ccc(cc3)OCC	training set	non-inhibitor
14736469	O(c1nc(nc(n1)N(C)C)N2CCOCC2)c3ccc(cc3)C(=O)OC	training set	inhibitor
14736472	S1C(=C(N(C1=S)c2ccc(cc2)C)N)C(=O)NCc3occc3	training set	inhibitor
14736519	O=C4N3N=C(N1CCN(CC1)CC)c2c(cccc2)C3=Nc5c4cccc5	training set	inhibitor
14736521	O=C(Nc1n(c2c(n1)cccc2)CCN3CCCCC3)C4CCCCC4	training set	non-inhibitor
14736707	O2C(CN(C(=O)Cc1ccc(cc1)C)CC2C)C	training set	non-inhibitor
14736712	Clc1c(ccc(c1)Cl)-c2oc(cc2)C{Z}=C3C(=O)ON=C3C	training set	inhibitor
14736977	Clc1c(cccc1Cl)CN(Cc2ccccc2)CCO	training set	inhibitor
14737061	S4C3=NC(=O)C({Z}=Cc1cc(c(cc1)OCCCOc2c(cccc2C)C)OC)C(=N)N3C=C4	training set	inhibitor
14737065	O=C(CN2C1=NCCCN1c3c2cccc3)c4c(ccc(c4)C)C	training set	inhibitor
14737074	S(c1nc(cc(c1C#N)C)C)CC(=O)C(C)(C)C	training set	inhibitor
14737167	O=C(N2CC(C(=O)NCCc1ccccc1)CCC2)N(C)C	training set	non-inhibitor
14737245	S(c1c3c(ccc1C(=O)NC)C(=O)c2c(cccc2)C3=O)CC	training set	inhibitor
14737250	S=C(NN1CCN(CC1)C)Nc2c(cccc2)C	training set	non-inhibitor
14737253	O(c1nc(cc(c1C#N)C)C)c2cc(ccc2)NC(=O)CCC	training set	inhibitor
14737255	FC(F)(F)C1(N(C2CC1C=C2)C(=O)c3ccc(cc3)C)C(F)(F)F	training set	non-inhibitor
14737405	s1nc(c(c1NN{E}=Cc2cc(c(cc2)OC)OC)C#N)SC	training set	inhibitor
14737406	P(=O)(c1ccccc1)(c2ccccc2)Cc3cc[n+](cc3)[O-]	training set	non-inhibitor
14737445	O=C(Nc1ccc(cc1)C(=O)OCC)C3(c2ccc(cc2)OC)CCOCC3	training set	non-inhibitor
14737448	O(c2c1nc(ccc1ccc2)C)C(=O)N(c3ccc(cc3)C)C	training set	inhibitor
14737450	O=C1N(C(=O)C2C1C3CC2C=C3)CCC(=O)Nc5cc4c(nccc4)cc5	training set	non-inhibitor
14737454	Brc1c(ncc(c1)Br)NCc2ccc(cc2)N(C)C	training set	inhibitor
14737455	s1c(nnc1Cc2cc(c(cc2)OC)OC)NC(=O)Cn3c4c(nc3)N(C(=O)N(C4=O)C)C	training set	non-inhibitor
14737475	s1c4c(nc1NC(=O)c2occc2)-c3c(cc(cc3)OC)C4	training set	inhibitor
14737480	O(C(=O)C2N(C(=O)CNC(=O)CNC(=O)OCc1ccccc1)CCC2)Cc3ccccc3	training set	non-inhibitor
14737522	S=C3N(C(=O)c1c(cc2c(c1)OCO2)N3)Cc4ccc(cc4)C(=O)NCC=C	training set	inhibitor
14737568	S(C2=Nc1c(cc(c(c1)OC)OC)C(=O)N2Cc3ccc(cc3)OC)CC(=O)NCCCC	training set	non-inhibitor
14737571	o1c(ccc1COc2cc(c(cc2)C)C)C(=O)Nc3c(cccc3)C(=O)OC	training set	inhibitor
14737573	o1c(ccc1COc2c(cccc2)OC)C(=O)N(C)C	training set	inhibitor
14737581	Clc1cc2c(cc1)OC(=CC2=NCCO)c3ccccc3	training set	inhibitor
14737583	O=C(N3c1c(cccc1)C(N(c2ccccc2)C(=O)C)CC3C)CCC	training set	non-inhibitor
14737688	FC(F)(F)C1(O)C3=C(N(C1=O)Cc2ccccc2)CC(CC3=O)(C)C	training set	non-inhibitor
14737705	S(C2=Nc1c(cccc1)C(=O)N2CCNC(=O)C)CC(=O)NCCCC	training set	non-inhibitor
14737851	Fc1ccc(cc1)C3N(C(=O)c2c(cccc2)C3C(=O)Nc4cc5c(cc4)OCCO5)CCOC	training set	non-inhibitor
14737919	s1c2c(cc1)N=C(N(C2=O)C3CCN(CC3)C(=O)OCC)SCC(=O)c4ccccc4	training set	non-inhibitor
14738097	O=C(Nc1c(cccc1)C)C3(N(C(=O)Cc2nc([nH]n2)N)CCC)CCCCC3	training set	non-inhibitor
14738123	o1nc(c(n1)N)NN{E}=Cc2ccc(cc2)OC	training set	inhibitor
14738126	Fc1c(c(c(nc1NCCO)F)F)Oc2c(cccc2)C(=O)OCC	training set	inhibitor
14738163	S=C(N2CCC(N(CC1OCCC1)C)CC2)Nc3c(c(ccc3)C)C	training set	non-inhibitor
14738197	O(c1nc(nc(n1)N(CCCC)CCCC)-n2nnc(c2C)C(=O)C)C	training set	inhibitor
14738370	Clc1c(cccc1)CN3C(C(=O)NCCCN(c2ccccc2)C)CCC3=O	training set	non-inhibitor
14738410	S3C(=C2N(c1c(cccc1)C(=O)N2)C3=S)C(=O)NCc4ccccc4	training set	inhibitor
14738475	O=C1N(C(=O)Nc2c1cc(c(c2)OC)OC)CCC(=O)N4CCC(N3CCCCC3)CC4	training set	non-inhibitor
14738484	S(C2=Nc1c(cccc1)C(=O)N2CCNC(=O)C)Cc3ccc(cc3)C	training set	inhibitor
14738495	S(c2n1nc(nc1c3c(n2)cccc3)CCc4c(n[nH]c4C)C)CC(=O)Nc5cc(ccc5)C	training set	non-inhibitor
14738507	O(C(=O)c1nc(c2c(n1)cccc2)Nc3ccc(cc3)C(=O)OCC)CC	training set	inhibitor
14738528	O=C1NC(CN=C1C{Z}=C(O)c2ccc(cc2)C)C	training set	inhibitor
14738549	s2c1nc(nc(c1c(c2C(=O)OCC)C)NCc3ccc(cc3)F)CC(=O)OC	training set	inhibitor
14738621	Clc1cc(ccc1Cl)N2C(SCC2=O)c3ncccc3	training set	inhibitor
14738639	O(C({E}=C(C(=O)c1ccccc1)C(=N)NCCCO)O)CC	training set	non-inhibitor
14738665	O4c1c(ccc(c1)NC(=O)C3CCN(C(=O)c2ccccc2)CC3)OCC4	training set	non-inhibitor
14738666	O=C(c2c(n1nc(cc1nc2)C)C)C	training set	inhibitor
14738950	S(=O)(=O)(NCc1ccc(cc1)C(=O)N2CCC(CC2)Cc3ccccc3)c4c(ccc(c4)C)C	training set	non-inhibitor
14738954	s1c(nc(c1)-c2ccc(cc2)O)Nc3cc(ccc3)OC	training set	inhibitor
14739050	Clc1ccc(cc1)CNC(=O)c2nccnc2	training set	inhibitor
14739117	O=C3N(c1ccc(cc1)OCC)CC(=O)N(c2ccc(cc2)OCC)C3	training set	non-inhibitor
14739382	o1nc(nc1CCc2ccccc2)-c3ccccc3	training set	inhibitor
14739437	s1c(c(c2c1CCCC2)C(=O)NCCCOC)NC(=O)c3sccc3	training set	inhibitor
14739477	O3C(Cn1c(ccc1CCC(=O)O)-c2ccc(cc2)C)CCC3	training set	non-inhibitor
14739633	Fc1ccc(cc1)CCN2C(=O)NC(=O)CC2=O	training set	non-inhibitor
14739733	s1c2c(nc1COC(=O)C)cccc2	training set	inhibitor
14739745	Clc1c(cccc1)C(=O)NC(c2n(c(nn2)SCC(=O)Nc3c(cccc3)C(=O)OC)C)CO	training set	non-inhibitor
14739769	s1c(c(c(c1C)C)C(=O)N)NC(=O)C2C(C(=O)O)CCCC2	training set	non-inhibitor
14739776	S(=O)(=O)(N2C(=O)N(S(=O)(=O)c1sccc1)c3c2cccc3)c4sccc4	training set	non-inhibitor
14739806	S(=O)(=O)(Nc2c4c(c1oc3c(c1c2)C(=O)CC(C3)(C)C)cccc4)c5ccc(cc5)OC	training set	inhibitor
14739808	O=C(NC(C(=O)O)C(C)C)c1ccc(cc1)C(C)(C)C	training set	non-inhibitor
14739887	Clc1c(cccc1)S(=O)(=O)Nc2c3c(c(cc2)C)CC(O3)(C)C	training set	inhibitor
14739945	Clc1c(ccc(c1)Cl)C(=O)NC2(C3=C(NC2=O)N(C(=O)NC3=O)Cc4ccccc4)C(F)(F)F	training set	inhibitor
14739946	o1c(ccc1)C(=O)N3CCN(c2ccc(cc2)N)CC3	training set	non-inhibitor
14739978	O(c1ccc(cc1)C(=O)CC)CC(O)CN2CCCCC2	training set	non-inhibitor
14739997	O=C(O)CC(n1cccc1)c2c3c(ccc2)cccc3	training set	non-inhibitor
14740008	S(=O)(=O)(N(c1ncccc1)CC(=O)OCC)c2ccccc2	training set	inhibitor
14740127	S=C(Nc1ccc(cc1)Nc2ccccc2)NC(C)(C)C	training set	inhibitor
14740128	s1c(nnc1COC)NC(=O)CCN3C(=O)c2c(cccc2)C3=O	training set	non-inhibitor
14740175	S(c1ccc(cc1)C)CCNC(=S)Nc2cc(c(cc2)C)C	training set	inhibitor
14740178	SC3=NC1=C(N2CCC1CC2)C(N3)c4cc(ccc4)F	training set	non-inhibitor
14740230	o1c(ccc1C)C(c2c(c(ccc2)[N+](=O)[O-])O)c3oc(cc3)C	training set	inhibitor
14740286	S=C3N(C(=O)C(=Cc1oc(cc1)N2CCCCCC2)C(=O)N3C)C	training set	inhibitor
14740343	Sc1n(c(nn1)-c2nccnc2)-c3ccc(cc3)OC	training set	non-inhibitor
14740360	O(c1ccc(cc1)-c2c(n(nc2C)Cc3ccccc3)N)C	training set	inhibitor
14740424	O(c1nc(nc(n1)Nc2ccccc2)N(CC)CC)c3ccc(cc3)C(=O)OC	training set	inhibitor
14740488	S(=O)(=O)(N(C1CCCCC1)CC(=O)N3CCN(c2ccc(cc2)F)CC3)c4ccc(cc4)C	training set	non-inhibitor
14740633	[O-][N+](=O)c1c(nc(nc1C)N2CCOCC2)N3CCN(CC3)c4ccccc4	training set	inhibitor
14740669	s1c4c(c(c1NC(=O)CSc2n(c(nn2)-c3occc3)CC)C#N)CCC(C4)C(C)(C)C	training set	non-inhibitor
14740675	O=C1N(C(=O)N(c2c1cn3nccc(c32)C)C)C	training set	inhibitor
14740690	O=C1N(C(=O)c2c1cc(cc2)Oc3c(cccc3)OC)c4ccc(cc4)C	training set	non-inhibitor
14740711	S1C(=C(N(C1=S)c2ccc(cc2)OC)N)C(=O)NCc3occc3	training set	inhibitor
14740717	O=C1N(C(=O)c2c1cccc2)CCC(=O)Oc3cc4c(cc3)cccc4	training set	inhibitor
14740734	O=C1N(C(=O){R}C2C1C3C4{S}C(C2C=C3)C(=O)N(C4=O)C5CCCCC5)C6CCCCC6	training set	non-inhibitor
14740735	Clc1ccc(cc1)C2N(C(=S)N3N2CCC3)c4ccccc4	training set	inhibitor
14740769	Brc1c(cccc1)NC(=O)C32C(C(C({E}=NO)C2)(CC3)C)(C)C	training set	non-inhibitor
14740775	S=C2N(c1c(ccc(c1)C)C)CN(CN2)CC	training set	non-inhibitor
14740781	O=C1N(C(=O)Nc2c1cccc2)CC	training set	inhibitor
14740782	ClC1=C(SC(=O)N1Cc2cc(ccc2)C(=O)O)C{E}=NNC(=O)c3ccc(cc3)C	training set	non-inhibitor
14740813	O=C3c1c(nc(nc1)Nc2cc(cc(c2)C)C)CC(C3)c4ccc(cc4)OC	training set	inhibitor
14740815	O=C2c1c(nc(nc1)N)CC(C2)C	training set	non-inhibitor
14740825	s1c(nnc1C)NC(=O)CCC(=O)NCc2sccc2	training set	non-inhibitor
14740834	Fc1cc(ccc1)NC{Z}=C2C(=O)N(C(=O)NC2=O)CCC3=CCCCC3	training set	non-inhibitor
14740836	Fc1ccc(cc1)CNC({E}=C2C(=O)N(C(=O)NC2=O)CCCC)CC	training set	inhibitor
14740840	O(C(=O)C({E}=C(N(C)C)C{E}=CC{E}=CC{E}=CN(C)C)C(=O)C)C	training set	non-inhibitor
14740846	O2c1c(cccc1)CNC(=O)C2	training set	non-inhibitor
14740849	O=C1N(C(=O)C(Cc2n(nc(c21)C)-c3ccccc3)(C)C)Cc4ccccc4	training set	inhibitor
14740853	OC1=C(C(=O)N(C2=C1CCCC2)CCC)C(=O)NCc3ccccc3	training set	inhibitor
14740858	Brc1cc(ccc1)C2N(C(=O)C(=C2C(=O)c3oc4c(c3)cccc4)O)CCN(C)C	training set	non-inhibitor
14740859	S(c1nc(c2c(c1C#N)CCCC2)C)CC(=O)Nc3ccc(cc3)OCC	training set	inhibitor
14740866	o1c(c(c2c1nc(cc2C)C)N)C(=O)c3ccc(cc3)C	training set	inhibitor
14740871	Clc1c(cccc1)C(=O)Nn2c(c(c(c2C)C(=O)C)C(=O)C)C	training set	non-inhibitor
14740875	Clc1ccc(cc1)N5C(=O)C3C(Sc2nc(sc2C3c4ccccc4)O)C5=O	training set	non-inhibitor
14740880	S(=O)(=O)(N1CCC(CC1)C)c2cc5c(cc2)-c3c(cc(cc3)S(=O)(=O)N4CCC(CC4)C)C5=NO	training set	non-inhibitor
14740894	S(c1nc2c(nc1C)cccc2)CC(=O)N3CCC(CC3)C	training set	inhibitor
14740902	n1(nc(c2nc3c(nc21)cccc3)-c4ccccc4)CCCC	training set	inhibitor
14740909	O4c1c(ccc(c1CN2CCOCC2)O)-c3c(cccc3)C4=O	training set	inhibitor
14740913	Clc1c(ccc(c1)Cl)Cn2c5c(nc2N3CCN(CC3)c4ncccc4)N(C(=O)N(C5=O)C)C	training set	non-inhibitor
14740917	O=C(NCC(=O)OCC)c1cnccc1	training set	non-inhibitor
14740920	O=C(C{E}=Cc1nc2c(cc1)cccc2)C	training set	inhibitor
14740921	O2CCN(c1nc(nc(c1)O)N)CC2	training set	non-inhibitor
14740938	OC1=C(C(N(C1=O)c2ncccc2)c3cc(c(cc3)OC)OC)C(=O)c4cc(ccc4)OC	training set	non-inhibitor
14740954	S(=O)(=O)(N)c1ccc(cc1)NC(=O)CC(CC(=O)O)C	training set	non-inhibitor
14740958	Clc1ccc(cc1)C(=O)NCCc2ccc(cc2)O	training set	inhibitor
14740971	S(c1n(c2c(n1)N(C(=O)NC2=O)C)CCC)c3n(c4c(n3)N(C(=O)NC4=O)C)CCC	training set	non-inhibitor
14740975	Brc2cc1c(c([nH]c1cc2)C(=O)OC)NC(=O)CN4c3c(cccc3)CCC4	training set	inhibitor
14740979	O3C(=C(C(=O)N2c1c(cccc1)CCC2)C(=CC3=O)C)C	training set	non-inhibitor
14740999	Oc2n1nc(nc1nc3c2CCC3)NCc4ccc(cc4)OC	training set	non-inhibitor
14741006	s1c(ccc1)-c3n(c2nc4c(nc2n3)cccc4)CCC	training set	inhibitor
14741011	s1c(c(c(c1NC(=O)CSc2nc(cc(n2)C)C)C#N)C)C(=O)OCC	training set	inhibitor
14741016	Brc1ccc(cc1)C(=O)COc2nc(cc(c2C#N)C)C	training set	inhibitor
14741024	S(c1n(c(nn1)-c2occc2)Cc3occc3)CC(=O)Nc4ccc(cc4)NC(=O)C	training set	non-inhibitor
14741026	s2c1nc(nc(c1c3c2COC(C3)(C)C)NCC(O)C)-n4nc(cc4C)C	training set	inhibitor
14741028	s2c1nc(nc(c1c3c2CCCC3)SCCN(C)C)-n4nc(cc4C)C	training set	inhibitor
14741032	O(c3cc2c1ncnc(c1[nH]c2cc3)NCCCN4C(=O)CCC4)C	training set	inhibitor
14741039	s1c(ccc1)C2N(C(=O)C(=C2C(=O)c3n4c(nc3C)c(ccc4)C)O)CCN5CCOCC5	training set	non-inhibitor
14741054	s1c3c(c(c1)C(=O)Nc2sccn2)CCC(C3)C	training set	inhibitor
14741057	S2(=O)(=O)CC1N(C({Z}=NC(=O)CC)SC1C2)CC=C	training set	non-inhibitor
14741084	s1c(ccc1)CNC(=O)c3c2nc4c(nc2n(c3N)CCCCC)cccc4	training set	inhibitor
14741100	Oc2n1nc(c(c1nc(c2)CC(=O)OC)-c3ccccc3)C	training set	inhibitor
14741115	o4c1c(nc(nc1NCc2occc2)-c3ccccc3)c5c4cccc5	training set	inhibitor
14741127	S(c1n(c(nn1)-c2ccc(cc2)OC)CC)Cc3nc4c([nH]3)cccc4	training set	inhibitor
14741138	O=C(NNC(=O)CCCCCCC)CCC(=O)O	training set	non-inhibitor
14741144	BrC5=CC4=C3N=CN(N{E}=Cc1cc(c(cc1)OC)CN2CCOCC2)C(=C3N=C4C=C5)O	training set	inhibitor
14741195	O1C4=C(C(C(=C1N{E}=CN2CCN(CC2)C)C#N)c3ccccc3)C(=O)CC(C4)(C)C	training set	non-inhibitor
14741197	S3C({E}=Cc1oc(cc1)N2CCOCC2)C(=O)N(C3=O)Cc4ccc(cc4)F	training set	inhibitor
14741218	O=C(c1c2c([nH]c1C)cccc2)CNc3nc(ncc3COCC)C	training set	non-inhibitor
14741242	O2c1c(cccc1)OCC2C(=O)NCCCN3CCOCC3	training set	non-inhibitor
14741243	n51c4c(c2c1ccc(c2)-c3ccccc3)CCCC4=NCC5	training set	inhibitor
14741259	O(c1ccc(cc1)C(=O)CCC(=O)O)CC	training set	non-inhibitor
14741262	Clc1ccc(cc1)C2C({Z}=C(OCC=C)O)C(=NC(=C2C#N)SCC(=O)Nc3sccn3)C	training set	inhibitor
14741264	Clc1cnc(cc1)NC(=O)C2=C(OC(=O)C=C2C)C	training set	non-inhibitor
14741270	O=C2c1c(n(nc1C)CC(=O)OCC)CCC2	training set	non-inhibitor
14741287	O=C(NC2c1c(cccc1)CCC2)N{S}C(C(=O)O)C	training set	non-inhibitor
14741300	S(C({E}=NC#N)NCC=C)Cc1ccccc1	training set	inhibitor
14741324	Clc1ccc(cc1)-c2c3n(nc2C)c(cc(n3)C(C)(C)C)N4CCN(CC4)C(=O)c5occc5	training set	non-inhibitor
14741336	OC2(c1c(nccc1)-c3c2cccc3)CC	training set	inhibitor
14741359	S2c1c(cc(cc1)NC(=O)OCC)N(c3c2cccc3)C(=O)CCN4CCN(CC4)C	training set	non-inhibitor
14741371	S(=O)(=O)(N(CC)CC)c1cc(ccc1C)C2=NN(C(=O)c3c2cccc3)C	training set	non-inhibitor
14741373	S1C(=NC(=O)C1)N=Nc2c3c(n(c2O)CC)ccc(c3)CC	training set	inhibitor
14741379	s1c3c(c2c1CSC(C2)(C)C)C(=O)N(C(=N3)SCC(=O)NCc4occc4)c5ccc(cc5)C	training set	non-inhibitor
14741392	S(c1n(c(nn1)-c2ccc(cc2)C)CC=C)Cc3ccc(cc3)C#N	training set	inhibitor
14741400	Clc1c(sc2c1cccc2)C(=O)N(C3CS(=O)(=O)CC3)Cc4ccccc4	training set	non-inhibitor
14741420	O(C(=O){S}C(NC(=O)NCc1ncccc1)C(CC)C)C	training set	non-inhibitor
14741438	O=C3c1c(nc(c(c1-c2ccccc2)C#N)C)-c4c3cccc4	training set	inhibitor
14741448	O(C(=O)C(N1CCOCC1)CC(=O)O)C(C)C	training set	non-inhibitor
14741452	OC1=C(C(N(C1=O)CC2OCCC2)c3cc(ccc3)O)C(=O)c4ccc(cc4)OC	training set	non-inhibitor
14741458	S(c1n(c(nn1)-c2ccccc2)Cc3occc3)Cc4nc5c([nH]4)cccc5	training set	inhibitor
14741464	s1c(nnc1NC(=O)C)CCN2CCCCC2	training set	non-inhibitor
14741495	s1c(nc(c1)-c2ccccc2)C({E}=NO)C#N	training set	inhibitor
14741499	n1(nc(c2nc3c(nc21)cccc3)-c4ccccc4)CCCCC	training set	inhibitor
14741501	O=C1N(C(=O){R}C2{S}C1C3N({S}C2C(=O)C)C=Cc4c3cccc4)C5CCCCC5	training set	inhibitor
14741503	O(c3c2c1ncnc(c1[nH]c2ccc3)N4CC(CC(C4)C)C)C	training set	inhibitor
14741505	S(c1oc(nn1)-c2ccncc2)CC(=O)Nc3ccc(cc3)C	training set	non-inhibitor
14741536	o1c(nc(c1O)C{E}=Nc2ccccc2)-c3ccccc3	training set	inhibitor
14741541	O=C(Nc4nn1c(nc(cc1-c2ccccc2)-c3ccccc3)n4)CCC	training set	inhibitor
14741554	O(C(=O)NCC1CCC(CC1)C(=O)O)Cc2ccccc2	training set	non-inhibitor
14741569	OC(c1[n+](cn(c1)C)C)c2ccccc2	training set	non-inhibitor
14741575	Clc1ccc(cc1)Oc2nc(nc3c2oc4c3cccc4)C	training set	inhibitor
14741578	FC(F)(F)C2(NC(=O)c1cnccc1)C3=C(N(C2=O)CCCC)CC(CC3=O)(C)C	training set	non-inhibitor
14741591	s1c(ccc1)C(=O)C2=C(C(=O)N(C2c3ccccc3)CCOC)O	training set	non-inhibitor
14741593	n21c(c(c(c(c1nc3c2cccc3)C#N)C)CCC(C)C)-n4c(ncc4)C	training set	non-inhibitor
14741594	S2C1=C(CC(=C(N1C(=O)C2)N)C#N)C(=O)OCC	training set	inhibitor
14741601	O=C1N(C(=O)c2c1cccc2)COC(=O)CCNC(=O)c3ccccc3	training set	inhibitor
14741603	s2c1nc(c4c(c1c3ncnc(c32)SCC)CC(OC4)(C)C)-c5occc5	training set	non-inhibitor
14741613	s2c1nc4c(cc1c(c2C(=O)NCc3ccccc3)N)C(=O)CCC4	training set	inhibitor
14741616	S(C1=C(C(C({Z}=C(OCC=C)O)C(=N1)C)c2ccc(cc2)C)C#N)CC(=O)OCC	training set	inhibitor
14741619	Fc1ccc(cc1)C(=O)NC3=C(C2C(C2C3)(C)C)C(=O)C	training set	inhibitor
14741624	O=C1C(C(NC(C1C)c2c(c(ccc2)OC)O)c3c(c(ccc3)OC)O)C	training set	non-inhibitor
14741628	S2C(Cc1c(c(nc(c1C#N)O)C)C2)(C)C	training set	non-inhibitor
14741636	Oc1nc(c2c(c1C#N)CCCC2)CCCC	training set	inhibitor
14741641	Oc1nc(ncc1NC(=O)CCCCCCCCC=C)O	training set	non-inhibitor
14741645	s1c2c(c(c1C)C)C(=O)N(C(=N2)SCc3ccccc3)Cc4occc4	training set	inhibitor
14741661	s1c(nnc1CCC)NC(=O)CCC(=O)NCc2c(cccc2)OC	training set	non-inhibitor
14741691	O(C(=O)C1(NC(=O)CC1c2ccccc2)C(=O)O)CC	training set	non-inhibitor
14741695	S(=O)(=O)(N1{S}C3{R}C(c2c1ccc(c2)C)CN(CC3)C)c4ccc(cc4)[N+](=O)[O-]	training set	non-inhibitor
14741702	O(c1c(c(ccc1)C{E}=NNc2nc(nc(n2)N3CCCC3)N4CCCC4)O)C	training set	inhibitor
14741722	O=C1NC(=O)NC(=O)C1=C(Nc2c(ccc(c2)OC)OC)CC	training set	inhibitor
14741725	s1c(nnc1CC)NC(=O)CCC(=O)NCc2c(cccc2)OC	training set	non-inhibitor
14741771	S(c1nc(nc(n1)NC#N)NC(C)C)CC(=O)OC	training set	non-inhibitor
14741791	O=C(c1c2c([nH]c1)ccc(c2)OC)CN(CC)CC	training set	inhibitor
14741795	Brc1n(c2c(n1)N(C(=O)N(C2=O)CC(=O)OC)C)Cc3c(cccc3)Cl	training set	non-inhibitor
14741798	S2c1c(cccc1)N(c3c2cccc3)C(=O)N4CC(CCC4)(C)C	training set	non-inhibitor
14741810	Fc1ccc(cc1)C(O)(C(N2CCOCC2)c3ccccc3)c4ccccc4	training set	non-inhibitor
14741869	S(C1=NC(=O)C(=C(N1c2ccccc2)O)CC)CC(=O)NC(C)(C)C	training set	non-inhibitor
14741872	S(=O)(=O)(Oc1ccc(cc1)C{E}=C(NC(=O)c2ccccc2)C(=O)Nc3ccccc3)c4ccc(cc4)C	training set	non-inhibitor
14741897	s1c-3c(c2c1CCC2)C(=O)N(c4n-3cnn4)C	training set	inhibitor
14741914	s1c(c(c(c1C)C(=O)NCC(CN(C)C)(C)C)N)C(=O)OCC	training set	non-inhibitor
14741962	S1C(C(N(C1=S)Cc2cc3c(cc2)OCO3)N(O)C(=O)NC4CCCCC4)(C)C	training set	non-inhibitor
14741972	O1C2(C(CC1=O)C(=O)NCC)CCCCC2	training set	non-inhibitor
14741980	s1c3c(c(c1)-c2sccc2)C(=O)N(C(=S)N3)c4ccccc4	training set	inhibitor
14742007	S(c1ccccc1)CCc2ccncc2	training set	inhibitor
14742017	O=C2N(C(N(O)C(=O)Nc1ccccc1)C(N2CC(=O)NCC(=O)OC)(C)C)c3ccccc3	training set	non-inhibitor
14742028	O4C(CNc1ncnc2n(ncc21)-c3ccc(cc3)OC)CCC4	training set	inhibitor
14742035	O=C1N(C(C(=C1O)C(=O)c2occc2)c3ccc(cc3)O)c4noc(c4)C	training set	non-inhibitor
14742044	S(=O)(=O)(Nc1nc(ccn1)C)c2ccc(cc2)N	training set	non-inhibitor
14742052	o1nc(c(n1)NC(=O)C)NC(=O)c2ccc(cc2)C(C)(C)C	training set	inhibitor
14742056	S(c1ccc(cc1)F)CCc2ccncc2	training set	inhibitor
14742061	O=C(Nc2cc1nc(n(c1cc2)C)CN3CCN(CC3)C(=O)C)c4ccc(cc4)OC	training set	non-inhibitor
14742077	n1(c(ccc1)C{E}=Nn2cnnc2)-c3ccccc3	training set	inhibitor
14742083	O=C1NC(=O)CC1{E}=CNC(Cc2ccccc2)C	training set	non-inhibitor
14742086	s1c(nc2c1cccc2)SCC(=O)C3(OC(=O)CC3CC(C)C)C	training set	inhibitor
14742102	O=C1NCCCC1C(=O)NCCN(C)C	training set	non-inhibitor
14742107	O=C1N(C(=O)NC(=O)C1{Z}=C(NCc2occc2)C)c3ccccc3	training set	inhibitor
14742112	Clc1sc(cc1)C(=O)CSc2nc(nc3c2oc4c3cccc4)CC	training set	inhibitor
14742116	Clc3cc2c1nc4c(nc1n(c2cc3)CC)cccc4	training set	inhibitor
14742131	OC(c1ccccc1)(C(C)C)C#CCN2CCCC2	training set	non-inhibitor
14742138	Brc1ccc(cc1)N3C(=O)c2c(csc2N=C3)-c4sccc4	training set	inhibitor
14742144	O=C1N(C(=O)NC(=O)C1{E}=C(NCCN2CCOCC2)C)Cc3ccccc3	training set	non-inhibitor
14742146	Clc1c(cccc1)-c2nc4c(c(n2)NN{E}=Cc3cnccc3)cccc4	training set	inhibitor
14742172	S(c1nc(nc2c1oc3c2cccc3)CC)CC(=O)N5c4c(cccc4)CCC5	training set	inhibitor
14742191	O=C1N(N(C(=C1NC({E}=C2C(=O)N(C(=O)NC2=O)Cc3ccccc3)C)C)C)c4ccccc4	training set	non-inhibitor
14742195	Fc1ccc(cc1)C3Cc2nc(ncc2C(=O)C3)NCC4OCCC4	training set	inhibitor
14742200	O(c1nc(nc(c1)C)NCc2ccccc2)C(C)C	training set	inhibitor
14742209	O3c1c(ccc(c1)OCc2nn[nH]n2)C(=CC3=O)CCC	training set	inhibitor
14742220	Fc1c(c(ccc1)F){R}C2C(C(=C(C3=CC4N(C({R}C32)CC4)C)C#N)N)(C#N)C#N	training set	non-inhibitor
14742223	s1c3c(c2c1COC(C2)(C)C)C(=O)N(C(=N3)c4ccccc4)N	training set	inhibitor
14742235	s1c(ccc1)C(=O)C2=C(C(=O)N(C2c3cc(ccc3)O)c4noc(c4)C)O	training set	non-inhibitor
14742252	O=C1N(C(C(N1C)N(O)C(=O)NC)(C)C)CCCCCCCC	training set	non-inhibitor
14742257	O(n1c4c(nc1-c2ccccc2)-c3nonc3CC4)C	training set	inhibitor
14742291	S(c1nc(cc(c1C#N)C(F)(F)F)C)CC(=O)OC	training set	inhibitor
14742294	s1c(c(c(c1NCC=C)C#N)N)C(=O)c2ccc(cc2)C	training set	inhibitor
14742326	o1c(ccc1)C2C(C(=O)C=C(C2)c3ccc(cc3)C)C(=O)OCC	training set	inhibitor
14742331	Brc1cc2c(cc1)N(C(=O)C(OC(=O)C)N=C2c3ccccc3)C	training set	non-inhibitor
14742340	S1C(=S)N(C(=O)C1{Z}=CC{E}=Cc2occc2)C(C(=O)O)C(C)C	training set	non-inhibitor
14742354	O(c1nc(cc(c1C#N)C)C)c2ccccc2	training set	inhibitor
14742360	O(C(=O)C(NC(=O)C)C(=O)O)CC	training set	non-inhibitor
14742372	S1C(=NC(=O)C1C)NC(=O)C	training set	non-inhibitor
14742374	S2c1c(cccc1)C(=O)N=C2NC(=O)Cc3ccccc3	training set	inhibitor
14742384	O(c1nc(nc2c1cccc2)-c3ccc(cc3)OCCC)C	training set	inhibitor
14742393	S(c1n(c(nn1)-c2cc(ccc2)NC(=O)c3c(cccc3)F)C)CC(=O)NC4CC4	training set	non-inhibitor
14742404	S(c1ncnc2c1oc3c2cccc3)c4cc5c(cc4)cccc5	training set	inhibitor
14742409	O=C(NC)C{Z}=C1NC(Cc2c1ccc3c2cccc3)(C)C	training set	inhibitor
14742424	O=C2N(C(C1C(=O)N(C(=O)N(C1=O)C)C)c3c2cccc3)Cc4ccc(cc4)[N+](=O)[O-]	training set	non-inhibitor
14742441	O=C1C(=C(O)CC(C1)(C)C)C(C2=C(CC(CC2=O)(C)C)O)C#Cc3ccccc3	training set	non-inhibitor
14742444	S(CC1=C(C(C(=C(O1)N)C#N)c2ccc(cc2)OC)C(=O)OCC)c3nc(ccc3C#N)-c4ccccc4	training set	inhibitor
14742457	S1C({Z}=CN(C(=O)CC)C)C(=O)c2c1cccc2	training set	inhibitor
14742461	S2C({Z}=NN(c1ccccc1)C(=O)C)C(=O)c3c2cccc3	training set	inhibitor
14742471	O2c1c(ccc(c1CN(CC)CC)O)C(=O)C(=C2)Oc3c(cccc3)OC	training set	non-inhibitor
14742475	Clc1c(ccc(c1)Cl)C3=Nc2c(cccc2)C(=O)N3CCCn4cncc4	training set	inhibitor
14742484	O=C3c1c(ccc(c1NCCO)C(=O)N2CCCCC2)C(=O)c4c3cccc4	training set	inhibitor
14742509	O2c1c(cc(c(c1CN(CC)CC)O)CC)C(=O)C(=C2C)c3n(c4c(n3)cccc4)C	training set	non-inhibitor
14742510	O(C(=O)c1[nH]c2c(c1NC(=O)NC(C)C)cc(cc2)OC)CC	training set	inhibitor
14742530	s1c(nc(c1)-c2sccc2)N	training set	inhibitor
14742563	Clc1ccc(cc1)CON3C(=Nc2c(cccc2)C3=O)n4nc(cc4C)C	training set	inhibitor
14742564	FC(F)(F)C1(NC(=O)CC(C)C)C3=C(N(C1=O)Cc2ccccc2)CC(CC3=O)(C)C	training set	non-inhibitor
14742643	S(c1n(c(nn1)-c2sccc2)CC)CC(=O)c3ccccc3	training set	inhibitor
14742645	O3c2ncn1nc(nc1c2C(c4c3ccc5c4cccc5)c6ccccc6)CON{E}=Cc7ccc(cc7)OC	training set	non-inhibitor
14742673	Fc1ccc(cc1)N5CCN(CC2=CC(=O)Oc3c2cc4c(c3)CCCC4)CC5	training set	non-inhibitor
14742693	S=C4N(C(=O)C(C1N(C(=O)c2c1cccc2)Cc3ccccc3)C(=O)N4)CCCC	training set	inhibitor
14742720	s1c3c(c2c1CCCCC2)C(=O)N(C(=O)N3CCN(C)C)Cc4occc4	training set	inhibitor
14742721	O=C3c2c(nc1n(ncn1)c2)CC(C3)(C)C	training set	non-inhibitor
14742737	Oc1c(ccc(c1)O)C4Nc3c2c(cccc2ccc3)N4	training set	inhibitor
14742740	s1c(nc2c1cccc2)CC(=O)c3c(cc(c(c3)CCC)O)O	training set	inhibitor
14742761	O=C(Nc2cc1nc(n(c1cc2)C)CCN3CCC(CC3)C)NC4CCCCC4	training set	non-inhibitor
14742783	O=C3C1=C(NC(=O)CC1C(=O)Nc2ccc(cc2)OC)CC(C3)(C)C	training set	non-inhibitor
14742786	Clc2c(n1nc(nc1nc2C)-c3ccc(cc3)Cl)C	training set	inhibitor
14742810	S3c1n(c(nn1)-c2ccc(cc2)OC)N=C(C3)C	training set	inhibitor
14742817	S3C(c1c(n(nc1C)C2CC(OCC2)(C)C)NC(=O)C3)c4ccc(cc4)OC	training set	non-inhibitor
14742819	s1c(c(nc1NC(=S)N)C)C(=O)Nc2ccccc2	training set	inhibitor
14742820	FC(F)(F)C1(NC(=O)C(C)(C)C)C3=C(N(C1=O)Cc2ccccc2)CC(CC3=O)(C)C	training set	non-inhibitor
14742830	S(c1nc2c([nH]1)ccc(c2)OC)CC(=O)c3occc3	training set	inhibitor
14742835	O=C3c1c(nc(nc1C)N2CCN(CC2)CC)CCC3	training set	inhibitor
14742868	S4(=O)(=O)CC(NC{E}=C2c1c(cccc1)C(=O)N(C2=O)c3cc(cc(c3)C)C)CC4	training set	non-inhibitor
14742902	o1c(ccc1)C2N(C(=O)C(=C2C(=O)c3cc(c(cc3)OC)OC)O)Cc4cnccc4	training set	non-inhibitor
14742967	O=C1N(C(=O)N(C(=O)C1=CNCCOc2c(cccc2)C)C)C	training set	inhibitor
14743075	Oc1c(cc(cc1C(C)(C)C)C{E}=Nn2cnnc2)C(C)(C)C	training set	inhibitor
14743076	s2c1ncnc(c1c3c2CCC3)N{S}C(C(=O)O)C	training set	non-inhibitor
14743089	S(=O)(=O)(C({E}=CC2=C(N1CC(OC(C1)C)C)N=C3N(C2=O)C=CC=C3)C#N)c4ccc(cc4)C	training set	non-inhibitor
14743096	O=C(Nc1n(c2c(n1)cccc2)Cc3ccccc3)C	training set	inhibitor
14743098	O=C1N=C(N(C(=C1)c2ccccc2)c3ccc(cc3)C)C	training set	non-inhibitor
14743116	Clc1sc(cc1)C(=O)CSc2nc(nc3c2oc4c3cccc4)C	training set	inhibitor
14743140	Clc1ccc(cc1)-n2c(nnc2SCC(=O)NCC(=O)OCC)-c3ccncc3	training set	non-inhibitor
14743145	o1c(ccc1)C{E}=NNC(=O)Cn2nccc2C	training set	non-inhibitor
14743146	s1c3c(nc1SCC(=O)Nc2sccn2)cccc3	training set	inhibitor
14743150	FC(F)(F)C1(NC(=NC2=C1C(=O)NC(=O)N2Cc3occc3)c4ccc(cc4)C#N)C(F)(F)F	training set	non-inhibitor
14743165	o2c1nc(c3c(c1c(c2C(=O)OCC)N)CCC3)CC(C)C	training set	inhibitor
14743169	Clc1ccc(cc1)-c2c(n(nc2C)-c3nc4c([nH]3)cccc4)N	training set	inhibitor
14743174	S2C1=C(C(=O)N(C(=N1)CCC)CCOC)C(=O)c3c2cccc3	training set	inhibitor
14743177	n1(cnnc1)N{E}=CC({Z}=Cc2ccccc2)C	training set	inhibitor
14743180	O=C(NCCCN(CCCN(Cc1ccccc1)C)C)c2cnc(cc2)C{E}=NO	training set	non-inhibitor
14743242	S5C1(C4(N(CC1c2ncccc2)C)c3c(cccc3)NC4=O)C(=O)N(C5=S)Cc6ccccc6	training set	inhibitor
14743250	S(C2=Nc1c(cccc1)C(=O)N2OC)C(C)C	training set	inhibitor
14743253	s1c(ccc1)CNc3cc2ncn(c2cc3)-c4ccccc4	training set	inhibitor
14743257	S(c1n-2c(nn1)N(N)C(=O)c3c-2cccc3)CCC	training set	inhibitor
14743284	s1c(ccc1)C(=O)NC2(C3=C(NC2=O)N(C(=O)NC3=O)CCc4cc(c(cc4)OC)OC)C(F)(F)F	training set	non-inhibitor
14743311	FC(F)(F)C1(NC(=O)C)C3=C(N(C1=O)Cc2ccccc2)CC(CC3=O)(C)C	training set	non-inhibitor
14743313	FC(F)(F)C1(NC(=NC2=C1C(=O)NC(=O)N2Cc3occc3)CCC4CCCCC4)C(F)(F)F	training set	non-inhibitor
14743316	FC(F)(F)C1(NC(=O)C(C)(C)C)C(=C(NC1=O)C)C#N	training set	non-inhibitor
14743317	S=C(Nc1c(cc(c(c1)OC)OC)C(=O)OC)N2CCCCC2	training set	inhibitor
14743320	O=C2N1C(N=C(NC1=NC(=C2)C)Nc3c(cc(cc3)C)C)c4ccccc4	training set	non-inhibitor
14743337	[O-][n+]1c(c[n+](c2c1CCCC2)[O-])-c3c(cc(cc3)OCC)OCC	training set	non-inhibitor
14743346	O=C4c2c(n1nc(c(c1nc2)-c3ccccc3)C)CC(C4)c5ccccc5	training set	inhibitor
14743370	Clc1ccc(cc1)C(=O)Nc3cc2nc(n(c2cc3)C)CN4CCCCC4	training set	non-inhibitor
14743379	o1c(c(c2c1ccc(c2)O)C(=O)OCC)C(C)(C)C	training set	inhibitor
14743381	S1C4C(C(c2sc(nc21)O)c3ccccc3)C(=O)N(C4=O)c5ccccc5	training set	non-inhibitor
14743424	Clc1cc(ccc1)CSC3=Nc2c(cccc2)C(=O)N3OC	training set	inhibitor
14743428	s2c1nc(c4c(c1c3ncnc(c32)NCCN(C)C)CC(SC4)(C)C)N5CCOCC5	training set	non-inhibitor
14743442	s1c(ccc1)C2N(C(=O)C(=C2C(=O)c3c(c([nH]c3C)C(=O)OC)C)O)CCN(C)C	training set	non-inhibitor
14743479	O=C(Nc1nc3c(n2nnnc21)cccc3)c4ccc(cc4)C	training set	inhibitor
14743489	Clc1ccc(cc1)N4C(=O)c2c(sc3c2CC(OC3)(C)C)N(C4=O)C	training set	inhibitor
14743493	S(C3=Nc1c(cc2c(n1)CC(OC2)(C)C)C(=O)N3c4ccccc4)CC(=O)NC(Cc5ccccc5)C	training set	non-inhibitor
14743494	Brc1ccc(cc1)C3Nc2sc4c(c2C(=O)N3)CCC4	training set	inhibitor
14743501	Clc1c(ccc(c1)CSc2oc(nn2)CCCCCN)Cl	training set	inhibitor
14743506	S3(=O)(=O)CC(N(C(=O)c1ccccc1)Cc2occc2)CC3	training set	non-inhibitor
14743508	S(c1n(c(nn1)-c2sccc2)CC)CC(=O)c3cc4c(cc3)cccc4	training set	inhibitor
14743548	O(C(=O)C({E}=CC=C1C=CN(C=C1)CCCCCC)C#N)CC	training set	non-inhibitor
14743551	Clc1cc3c(cc1)Sc2c(cccc2)N3CCCN(C)C	training set	inhibitor
14743555	Clc1ccc(cc1)C(=O)NNC2C(=O)N(C(=O)C2)C	training set	inhibitor
14743558	o1c(nnc1-c2cc(ccc2)NC(=O)CC)-c3cc(ccc3)NC(=O)CC	training set	non-inhibitor
14743560	s1c(ccc1)C({E}=NOCC(=O)NN{E}=Cc2c(c(ccc2)OC)OC)C	training set	inhibitor
14743564	n41c(nc2c1cccc2)-c3c(cccc3)N(C4c5ncccc5)Cc6ccccc6	training set	inhibitor
14743567	Clc1c(cc2c(c1)OCO2)CSc3nc(cc(c3C#N)C)C	training set	inhibitor
14743573	Clc1c(ccc(c1)Cl)C(=O)CSc2nc(cc(c2C#N)C)C	training set	inhibitor
14743578	N32c1c(cccc1)N(C2=NCCC3)CCC	training set	non-inhibitor
14743586	s2c1nc(nc(c1c3c2CCC3)NC(CO)C)SCc4ccccc4	training set	inhibitor
14743592	OC1=C(C(N(C1=O)c2ncccc2)c3c(cc(cc3)OC)OC)C(=O)c4ccccc4	training set	non-inhibitor
14743593	Clc1ccc(cc1)CSCC(=O)Nc2sccn2	training set	inhibitor
14743672	O=C1N4C(=Nc2c1ccc(c2)C(=O)N3CCN(CC3)C)CCCCC4	training set	non-inhibitor
14743815	s1c(nc2c1cccc2)NC(=O)C4Oc3c(cccc3)OC4	training set	inhibitor
14743821	S(=O)(=O)(N(C1CCCCC1)C(=O)NC(=O)NC(CC)C)C	training set	non-inhibitor
14743841	O=C(Nc1cc2c(cc1)CCC2)CC3CCCC3	training set	inhibitor
14743908	s1c(nnc1SCC)NC(=O)Cc2cc(c(cc2)OC)OC	training set	non-inhibitor
14743916	s1c(ncc1)NC(=O)C(c2ccccc2)CCC	training set	inhibitor
14743941	O=C(NC2c1c(cccc1)CCC2)c3cnc(cc3)O	training set	non-inhibitor
14743945	O(C(=O)c1nccnc1)CC(=O)NCc2ccc(cc2)C	training set	inhibitor
14743957	S1(=O)(=O)CC(NCCC)CC1	training set	non-inhibitor
14743963	Sc1oc(nn1)-c2c(n(c(c2)C)-c3ccccc3)C	training set	inhibitor
14743967	n1c([nH]c2c1cccc2)N(CC)CC	training set	inhibitor
14743993	Clc1c(ncc(c1C)Cl)NC(=O)COC(=O)CCS(=O)(=O)c2ccccc2	training set	inhibitor
14744005	S(c1ccc(cc1)Nc2c(cccc2)C(=O)N3CCCCC3)C(F)F	training set	inhibitor
14744008	O(C(=O)Cn1c2c(nc1C)cccc2)CC(=O)Nc3cc(c(cc3)OC)OC	training set	non-inhibitor
14744039	O(c1ncnc2c1cccc2)CCOc3ccc(cc3)OCC	training set	inhibitor
14744040	S(c1n(c(nn1)C)Cc2ccccc2)CC(=O)N4c3c(cccc3)NC(=O)C4	training set	non-inhibitor
14744096	S2C1=NC(=CC(=O)N1C=C2)CN4CCN(c3c(cccc3)OC)CC4	training set	non-inhibitor
14744173	S(c1nc2c(c(c1)C)ccc(c2)OC)CC(=O)c3cc4c(cc3)OCO4	training set	inhibitor
14744268	P(=O)(O)(c1n(c2c(n1)cccc2)CC)c3ccccc3	training set	non-inhibitor
14744304	O(c2cc1nc(cc(c1cc2)C)N3CCOCC3)C	training set	inhibitor
14744320	S(c1oc(nn1)-c2ccccc2)CC(=O)c3c(n(c(c3)C)CC5Oc4c(cccc4)OC5)C	training set	non-inhibitor
14744341	Oc2nc1n(nc(c1)C)c3c2cccc3	training set	inhibitor
14744365	S(c1n(c(nn1)-c2cnccc2)-c3c(cccc3)C(C)C)CC(=O)N5CCN(c4ccccc4)CC5	training set	non-inhibitor
14744366	S(CC(=O)C1=C(N(C(=O)N(C1=O)C)CCC)N)c2scc(n2)C	training set	inhibitor
14744383	S(CC(=O)c1c(n(c(c1)C)CCc2ccc(cc2)OC)C)c3nc(cc(n3)N)O	training set	non-inhibitor
14744391	Clc1ccc(cc1)S(=O)(=O)N4CCN(C(=O)CN2C(=O)C3(NC2=O)CCCCCC3)CC4	training set	non-inhibitor
14744397	S(=O)(=O)(N2c1c(cccc1)CC2)c3cc(ccc3)C(=O)Nc4sc5c(n4)CCN(C5)Cc6ccccc6	training set	non-inhibitor
14744407	s1c(nnc1NC(=O)COc2cc3c(cc2)C(=CC(=O)O3)C)C(CC)CC	training set	non-inhibitor
14744412	S3C(=NN=C(c1cc2c(cc1)OCCO2)C3)Nc4cc(ccc4)C	training set	inhibitor
14744447	Clc1c(c(ccc1)F)C(=O)Nc2ccc(cc2)S(=O)(=O)N(C)C	training set	non-inhibitor
14744460	S(c1n2c(nn1)cccc2)CC(=O)NC(=O)NC(C)(C)C	training set	non-inhibitor
14744470	Brc1ccc(cc1)S(=O)(=O)Nc2nc(nc3sc4c(c32)CCC4)C	training set	inhibitor
14744478	Clc1ccc(cc1)-c3nc2n(nc(c2c(c3)C(=O)OCC)C)CCC#N	training set	inhibitor
14744482	S(=O)(=O)(c1n(c2c(n1)cccc2)Cc3ccccc3)C	training set	inhibitor
14744484	FC(F)(F)c1cc(c(cc1)N2CCOCC2)NC(=O)c3ccc(cc3)-n4nc(cc4C)C	training set	non-inhibitor
14744490	S(c1n(c2c(n1)cccc2)-c3ccccc3)CC(=O)N(C(C)C)C(C)C	training set	inhibitor
14744493	S(=O)(=O)(N1CCOCC1)c2ccc(cc2)NC(=O)CSc3nc(cc(n3)C)O	training set	non-inhibitor
14744499	s1c(c(nc1C)C)C(=O)NN{E}=Cc2c3c(n(c2)C(=O)C)cccc3	training set	inhibitor
14744507	Clc2cn1c(nc(c1)CSC(C(=O)O)C)cc2	training set	non-inhibitor
14744526	O(C(=O)c1ncc(nc1)C)CC(=O)N(C(C)C)C(C)C	training set	non-inhibitor
14744552	S(c2c1ncccc1ccc2)Cc3ccc(cc3)C(=O)NN{E}=C(c4cc(c(cc4)OC)OC)C	training set	inhibitor
14744557	S(c1n(c(nn1)C2CCCCC2)CC=C)CC(=O)NC3CCCCC3	training set	non-inhibitor
14744569	S(c1n(c(nn1)C2CC2)-c3ccccc3)CC(=O)NCC	training set	non-inhibitor
14744572	N1=C(NC(=NC1(C)C)N)Nc2ccccc2	training set	non-inhibitor
14744578	s1c(nnc1NC(=O)c2ccncc2)C3CC3	training set	inhibitor
14744583	SC({E}=C([n+]1ccccc1)C(=O)c2cc(c(cc2)C)[N+](=O)[O-])Nc3cc(c(cc3)C)C	training set	inhibitor
14744589	O=C1N(N=C(c2c1cccc2)C(=O)NCC(N3CCOCC3)(C)C)CCC	training set	non-inhibitor
14744590	s1c3c(nc1CCCC(=O)Nc2sc(cn2)C)cccc3	training set	inhibitor
14744594	Clc1c(cc(c(c1)Cl)C(=O)N2CC(OC(C2)C)C)S(=O)(=O)NCC(C)C	training set	non-inhibitor
14744606	O(C(=O)c1c2c(nc(c1)C)cccc2)C3C(=O)OCC3	training set	inhibitor
14744614	Clc1ccc(cc1)CCNC(=O)CSc2nc(c(c(n2)C)C)C	training set	inhibitor
14744625	O=C(NC(c1ccccc1)c2ccccc2)Cn3c4c(nc3)cccc4	training set	non-inhibitor
14744630	O=C1N(C(=O)NC1(c2ccccc2)C)CC(=O)NCCC3=CCCCC3	training set	inhibitor
14744639	S(=O)(=O)(N(CC)CC)c2cc1nc(n(c1cc2)-c3c(cccc3)OC)SCC(=O)N4CCOCC4	training set	non-inhibitor
14744642	S(c1n(c(nn1)-c2ccccc2)Cc3cc4c(cc3)OCO4)CC(=O)Nc5c(cccc5C)C	training set	inhibitor
14744649	O(c1c(cccc1C)C)CC(O)CNC(C)(C)C	training set	non-inhibitor
14744661	s2c1nc(cc(c1c(c2C(=O)Nc3sccn3)C)C(F)(F)F)-c4sccc4	training set	inhibitor
14744688	s1c(nnc1CC(C)C)NC(=O)COc2cc3c(cc2)C(=CC(=O)O3)C	training set	non-inhibitor
14744693	Clc1ncccc1C(=O)OCc2c(cc(cc2)Cl)Cl	training set	inhibitor
14744695	Clc1ccc(cc1)Sc2c(cccc2)NC(=O)CSc3nc(n[nH]3)N	training set	non-inhibitor
14744709	S(c1n(c(nn1)-c2occc2)Cc3ccccc3)CC(=O)NC(=O)NC	training set	non-inhibitor
14744714	s1c(nnc1NC(C)C)SCc2ccc(cc2)C(=O)OC	training set	inhibitor
14744742	s1c(c(c2c1CCCC2)-c3nc4c([nH]3)cccc4)NC(=O)C(C)C	training set	inhibitor
14744757	S(c1ncnc2c1cccc2)C(C(=O)Nc3cc4c(cc3)OCO4)C	training set	inhibitor
14744763	[n+]1(ccc(cc1)CC)C3=Nc2c(cccc2)NC3=C(C#N)C#N	training set	non-inhibitor
14744776	S(=O)(=O)(Nc1nc(nc2sc3c(c21)CCC3)C)c4c(cccc4)C	training set	inhibitor
14744777	O(c1c(cc(cc1)C(=O)N3CCN(c2ccc(cc2)OC)CC3)OC)Cc4c(onc4C)C	training set	non-inhibitor
14744836	s1c3c(c(c1)-c2ccccc2)C(=O)N(C(=N3)SC(C(=O)NCc4cc5c(cc4)OCO5)C)CC=C	training set	inhibitor
14744837	S(CC{S}C(NC(=O)CC(C)(C)C)c1nc2c([nH]1)cccc2)C	training set	non-inhibitor
14744853	ClCC(=O)c1ccc(cc1)-n2nncc2C	training set	inhibitor
14744858	S(=O)(=O)(N(C)C)c1ccc(cc1)NC(=O)COC(=O)c2ncccc2	training set	non-inhibitor
14744862	Clc1c(ncc(c1)Cl)NC(=O)C(Sc2cc3c(cc2)OCCO3)C	training set	inhibitor
14744863	Oc1nc(nc2c1cccc2)CCC(=O)NCCCN(C)C	training set	non-inhibitor
14744869	Brc1cc(ccc1)OCCSc2sc(nn2)N	training set	inhibitor
14744908	s1c(nc(c1)C)NC(=O)Cc2c3c([nH]c2)cccc3	training set	inhibitor
14744945	s1c(ccc1)C(N2CCOCC2)CNC(=O)c3occc3	training set	non-inhibitor
14744947	s1c(nnc1C(CC)CC)NC(=O)C3Oc2c(cccc2)OC3	training set	inhibitor
14744969	O(CC(=O)c1[nH]c(c(c1C)C(=O)C)C)c2ccc(cc2)C#N	training set	inhibitor
14744985	Clc1ncc(cc1)C(=O)Nc2cc(ccc2)SC	training set	inhibitor
14744987	S(=O)(=O)(N(CC(=O)NCc1sccc1)CC)c2ccc(cc2)C(C)C	training set	non-inhibitor
14744996	S4(=O)(=O)CC(N(C(=O)CSc1n(c(nn1)Cc2c3c(ccc2)cccc3)N)CC)CC4	training set	non-inhibitor
14745001	s1c(cc2c1CCCCCC2)C(=O)NN	training set	inhibitor
14745027	O=C1N(C(=O)NC31c2c(cc(cc2)OC)CCC3)CC(=O)N	training set	non-inhibitor
14745040	Clc1ccc(cc1)SC(C(=O)c2[nH]c(c(c2C)C(=O)OCC)C)C	training set	inhibitor
14745067	S(c1n(c(nn1)-c2sccc2)CC)CC(=O)NC4c3c(cccc3)CCC4	training set	non-inhibitor
14745073	N4(C(c1c2c([nH]c1C)cccc2)c3ncccc3)CCC(CC4)C	training set	non-inhibitor
14745079	O(c1ccc(cc1)N2C(N=C(N=C2N)N)(C)C)C	training set	non-inhibitor
14745085	O=C1N(C(=O)N(C3=C1C(C({E}=C(OCc2ccccc2)O)C(=N3)C)c4cnccc4)C)C	training set	non-inhibitor
14745093	Sc1n(cnn1)N{E}=Cc4cc2c(n(c3c2cccc3)CC)cc4	training set	inhibitor
14745094	O(C({E}=C2C(n1ncnc1N=C2C)c3cnccc3)O)C	training set	non-inhibitor
14745109	S=C2N(C(=O)c1c(cccc1)N2)C3C(C(CCC3)C)C	training set	inhibitor
14745113	Clc1c(ncc(c1C)Cl)NC(=O)COC(=O)C=C(C)C	training set	inhibitor
14745122	S2(=O)(=O)N(c1c(cc(cc1)OC)-c3c2cccc3)C	training set	inhibitor
14745128	S(c1n(cnn1)-c2ccc(cc2)OC)CC(=O)Nc3ccc(cc3)N4CCOCC4	training set	non-inhibitor
14745131	s1c(c(c2c1CCCC2)-c3nc4c([nH]3)cccc4)NC(=O)CCNC(=O)C	training set	inhibitor
14745152	S1C(=C(N(C1=S)c2ccccc2)N)c3n(c4c(n3)cccc4)C	training set	inhibitor
14745162	Brc1cc(cnc1)C(=O)Nc2c(ccc(c2)C(C)(C)C)OC	training set	inhibitor
14745164	S(c1n(c(nn1)Cc2sccc2)C3CCCCC3)C(C(=O)N)C	training set	non-inhibitor
14745168	Brc1ccc(cc1)C(=O)NC(P(=O)(OC(C)C)OC(C)C)c2ccccc2	training set	non-inhibitor
14745171	O(C(=O)c1c2c(nc(c1)C)cccc2)CC(=O)NCCC(C)C	training set	inhibitor
14745178	S(c1ccc(cc1)NC2=C(C(=O)N3C(=N2)C(=CC=C3)C)C{E}=NCc4occc4)C(F)F	training set	inhibitor
14745185	s1c2c(c(c1C)C)C(=O)N(C(=N2)SCC(=O)Nc3noc(c3)C)C4CCCC4	training set	non-inhibitor
14745190	Sc1n(c(nn1)-c2c(occ2)C)CC	training set	inhibitor
14745206	Clc1ccc(cc1)SC({Z}=NS(=O)(=O)c2ccccc2)c3ccccc3	training set	inhibitor
14745215	s1c3c(c(c1NC(=O)CSc2nc([nH]n2)N)C#N)C=C(CC3(C)C)C{E}=Cc4ccc(cc4)OCC	training set	non-inhibitor
14745218	Clc1ccc(cc1)S(=O)(=O)N{Z}=C(Sc2ccccc2)c3ccccc3	training set	inhibitor
14745221	S(c1nc([nH]n1)-c2sccc2)CC(=O)N4c3c(cccc3)CCC4	training set	inhibitor
14745227	S(=O)(=O)(N2{S}C(C(=O)NC1=NCCS1)CCC2)c3ccc(cc3)OC	training set	non-inhibitor
14745230	s1cc(nc1)-c2n(c3c(n2)cccc3)CC(=O)Nc4c(ccc(c4)F)F	training set	inhibitor
14745236	s2c1n(nc(c1cc2C(=O)OCC(=O)NC)C)-c3ccc(cc3)F	training set	inhibitor
14745269	O=C1N(C(=O)NC21CCCCCC2)CC(=O)N3CC(OC(C3)C)C	training set	non-inhibitor
14745271	Sc1n(c(nn1)CC)N{E}=Cc2cc3c(cc2)OCO3	training set	inhibitor
14745293	Clc1c(cccc1)NC(=O)Nc2oc(nn2)-c3ccc(cc3)Cl	training set	inhibitor
14745309	S(=O)(=O)(N4C(C(=O)Nc1sc(nn1)C2CC2)Cc3c(cccc3)C4)c5c(cccc5)F	training set	inhibitor
14745314	Clc1c(ccc(c1)Cl)-c2n(c(nn2)SCC(=O)NC3CS(=O)(=O)CC3)C4CCCCC4	training set	non-inhibitor
14745317	S2C(=NN=C(c1ccc(cc1)C)C2)NCC	training set	inhibitor
14745319	S(=O)(=O)(N1CCOCC1)c2ccc(cc2)NC(=O)CSc3nc(cc(n3)N)O	training set	non-inhibitor
14745330	O=C(NC(c1n2c(nn1)CCCCC2)Cc3c4c([nH]c3)cccc4)c5ccccc5	training set	non-inhibitor
14745353	O(C(=O)c1nn2c(n1)nc(cc2C)C)CC(=O)Nc3cc(cc(c3)OC)OC	training set	inhibitor
14745374	O=C1N(N(C(=C1N2C(=O)C(=CC(=C2)C(=O)c3c(ccc(c3)C)O)C#N)C)C)c4ccccc4	training set	non-inhibitor
14745385	s1c2c(cc1CC)C(=O)N(C(=S)N2)c3ccccc3	training set	non-inhibitor
14745389	s1cc(nc1C)-c2c(noc2-c3c(cc(cc3)O)O)C(F)(F)F	training set	inhibitor
14745391	S(=O)(=O)(N1CCOCC1)c2ccc(cc2)OCC(=O)Nc3ccc(cc3)C	training set	non-inhibitor
14745416	Clc1ccc(cc1)-c2nn(cc2C{E}=NO)CCC#N	training set	inhibitor
14745418	Clc1c(nc(nc1)N2CCOCC2)C(=O)c3n4c(cc3C)cccc4	training set	inhibitor
14745426	s1c(ccc1C(=O)OCCNC(=O)c2cnccc2)C(=O)OCCNC(=O)c3cnccc3	training set	non-inhibitor
14745429	Clc1c(ncc(c1)C(F)(F)F)NN3C(=O)C({E}=Cc2ncccc2)SC3=S	training set	inhibitor
14745456	FC(F)(F)c2c1c(oc(c1)C(=O)OCC)nc(c2)-c3ccccc3	training set	inhibitor
14745477	Brc1cc(c(cc1)Cl)C(=O)ONC(=O)c2sccc2	training set	non-inhibitor
14745480	FC(F)(F)Oc1ccc(cc1)NC(=O)COC(=O)COc2ccccc2	training set	inhibitor
14745524	Clc1ccc(cc1)S(=O)(=O)N4CCC(C(=O)NC2=C(N(N(C2=O)c3ccccc3)C)C)CC4	training set	non-inhibitor
14745526	n1(c(c(cc1C)C{E}=Nc2ccc(cc2)C)C)C3CCCC3	training set	inhibitor
14745530	s1c4c(nc1NN{E}=Cc2c3c(n(c2C)CC)cccc3)cccc4	training set	inhibitor
14745588	O=C(NN{E}=Cc1ccncc1)c2nc(n3c2CCCCC3)-c4ccccc4	training set	inhibitor
14745649	Clc1ncccc1NS(=O)(=O)c2cc3c(cc2)OCCO3	training set	non-inhibitor
14745650	S(=O)(=O)(Nc2cc1n[nH]cc1cc2)c3ccc(cc3)C(=O)OCC	training set	inhibitor
14745686	S2C1=NC(=CC(=O)N1c3c2cccc3)COC(=O)Cc4c5c(oc4)cc(cc5)C	training set	inhibitor
14745696	S1(=O)(=O)N(C(=O)c2c1cccc2)CC(=O)c3c(ccc(c3)C)C	training set	non-inhibitor
14745707	O=C(O)c1c4c(nc2c1cccc2)C({E}=Cc3cc(ccc3)C)CN(C4)CC	training set	non-inhibitor
14745722	O(C(=O)c1c3c(nc2c1CCCC2)cccc3)CC(=O)Nc4ccc(cc4)OC	training set	inhibitor
14745731	S(=O)(=O)(N(CC)CC)c1cc(ccc1)C(=O)N{S}C(C(=O)OCC(=O)NC(=O)NC)C(C)C	training set	non-inhibitor
14745756	O=C(N2c1c(cccc1)CC2C)CN4c3c(cccc3)C(=CC4=O)O	training set	inhibitor
14745767	s2c1nc(nc(c1c3c2CCCC3)O)SCc4n(c(nn4)SCC(=O)OCC)-c5ccccc5	training set	inhibitor
14745789	N(C(c1ccccc1)C)C2=NCCCCC2	training set	non-inhibitor
14745799	Brc1ccc(cc1)C(=O)Nc2c(ccc(c2)C(F)(F)F)-n3ncnc3	training set	inhibitor
14745801	o1nc(c(c1C)COc2ccc(cc2)C(=O)OCC(=O)Nc3cc(c(cc3)OC)OC)C	training set	non-inhibitor
14745824	Clc1c(cccc1)C3(N(C(=S)Nc2c(cccc2)F)C)C(=O)CCCC3	training set	non-inhibitor
14745848	Brc1oc(cc1)C(=O)OCC(=O)Nc2cc(ccc2)S(=O)(=O)N(C)C	training set	inhibitor
14745850	S(=O)(=O)(Nc1c(cccc1)C(=O)Nc2c(cccc2)N3CCOCC3)c4c(cc(cc4)F)C	training set	non-inhibitor
14745859	s1c3c(nc1NC(=O)C2OCCC2)ccc(c3)F	training set	inhibitor
14745860	s1c(nnc1SCC=C)NC(=O)COc2cc3c(cc2)cccc3	training set	non-inhibitor
14745872	FC4(F)Oc1c(ccc(c1)NC(=O)COC(=O)c2nn3c(n2)nccc3C)O4	training set	inhibitor
14745894	S(=O)(=O)(N(CC)CC)c1ccc(cc1)C(=O)OCC(=O)c2c(c([nH]c2C)C)C(=O)OCC	training set	inhibitor
14745909	O(C(=O)NC(C(=O)O)C(C)C)Cc1ccccc1	training set	non-inhibitor
14745913	Brc1ccc(cc1)-c2nc(sc2)C({E}=NOC(=O)c3occc3)C(=O)N	training set	inhibitor
14745919	Fc1c(ccc(c1)OC)-c3nc2n(nc(c2c(c3)C(=O)OCC)C)CCC#N	training set	inhibitor
14745924	FC(F)(F)c1cc(ccc1)Nc2c(cccc2)C(=O)OCC(=O)NCc3occc3	training set	inhibitor
14745935	S(=O)(=O)(NC(=O)c1n(ccc1)C)c2ccc(cc2)C	training set	non-inhibitor
14745942	Clc1c(cc(cc1)Cl)OCCN2CCC(CC2)C	training set	inhibitor
14745947	FC(F)(F)c1cc(ccc1)Nc2ncccc2C(=O)OCC(=O)NCc3cc4c(cc3)OCO4	training set	inhibitor
14745951	s2c1ncnc(c1cc2)SCC(=O)NCCOC	training set	non-inhibitor
14745959	S3C({E}=NCc1ccccc1)N(N=C(c2ccc(cc2)OC)C3)C	training set	inhibitor
14745965	N(C1=NCCCCC1)C(CCC)C	training set	non-inhibitor
14745978	S(CC1=C(C(NC(=O)N1)c2ccc(cc2)F)C(=O)OC)c3n(cnn3)C	training set	non-inhibitor
14745981	Fc1ccc(cc1)C(=O)OCCNC(=O)c2nc3c(cc2)cccc3	training set	inhibitor
14745998	S(=O)(=O)(Nc1c(n(nc1C)-c2ccc(cc2)F)C)c3cc4c(cc3)cccc4	training set	inhibitor
14746013	Clc1ncccc1C(=O)N2CCC(CC2)C(=O)OCC	training set	non-inhibitor
14746028	Clc1c(c(ccc1)Cl)NP(=O)(c2sc3c(n2)CCCC3)c4ccccc4	training set	non-inhibitor
14746128	O2c1c(ccc(c1)OCC)C(=O)C(=C2C)Oc3ccccc3	training set	inhibitor
16952412	Oc2n1ncc(c1nc3c2CCCC3)C#N	training set	non-inhibitor
16952742	O=C1N(N=C(C1{Z}=Cc2c(n(nc2C)-c3ccccc3)O)C)c4ccccc4	training set	non-inhibitor
16953744	O2c1c(ccc(c1C)O)C(=O)C(=C2C)c3nc4c(cc3)cccc4	training set	inhibitor
17384874	P(=O)(N{R}C({R}C1{R}C(C1)C(=O)NCc2ncccc2)c3ccccc3)(c4ccccc4)c5ccccc5	training set	non-inhibitor
17384875	O=C(Nc1cc2c(cc1)cccc2){R}C({S}C3{R}C(C3)({R}C(NC(=O)OCc4ccccc4)c5ccccc5)C)C	training set	inhibitor
17384883	P(=O)(N{R}C({R}C1{R}C(C1)C(=O)NCc2oc(cc2)C)c3ccccc3)(c4ccccc4)c5ccccc5	training set	non-inhibitor
17384884	Fc1c(ccc(c1F)C)CNC(=O){R}C({S}C2{R}C(C2)({R}C(NC(=O)OCc3ccccc3)c4ccccc4)C)C	training set	inhibitor
17384887	P(=O)(N{S}C({S}C1{S}C(C1)C(=O)OC)c2ccccc2)(c3ccccc3)c4ccccc4	training set	non-inhibitor
17384892	P(=O)(N{S}C({S}C1{S}C(C1)C(=O)NCC2CC2)c3ccccc3)(c4ccccc4)c5ccccc5	training set	non-inhibitor
17384895	P(=O)(N{S}C({S}C1{S}C(C1)C(=O)NCCOC)c2ccccc2)(c3ccccc3)c4ccccc4	training set	non-inhibitor
17384899	O=C(NCc1ccccc1){R}C({R}C2{S}C(C2)({S}C(NC(=O)OCc3ccccc3)c4ccccc4)C)C	training set	non-inhibitor
17384901	P(=O)(N{S}C({S}C1{S}C(C1)C(=O)Nc2cc3c(cc2)cccc3)c4ccccc4)(c5ccccc5)c6ccccc6	training set	inhibitor
17384903	P(=O)(N{R}C({R}C1{R}C(C1)C(=O)NCc2ccccc2)c3ccccc3)(c4ccccc4)c5ccccc5	training set	non-inhibitor
17384910	S(=O)(=O)(c1ccc(cc1)CNC(=O){S}C5{S}C({S}C(NP(=O)(c2ccccc2)c3ccccc3)c4ccccc4)C5)C	training set	non-inhibitor
17384913	O=C(NCc1cc(c(cc1)OC)OC){R}C({R}C2{S}C(C2)({S}C(NC(=O)OCc3ccccc3)c4ccccc4)C)C	training set	inhibitor
17384914	P(=O)(N{S}C({S}C1{S}C(C1)C(=O)NCc2c(c(c(cc2)C)F)F)c3ccccc3)(c4ccccc4)c5ccccc5	training set	non-inhibitor
17384920	P(=O)(N{R}C({R}C1{R}C(C1)C(=O)NC)c2ccccc2)(c3ccccc3)c4ccccc4	training set	non-inhibitor
17384930	P(=O)(N{R}C({R}C1{R}C(C1)C(=O)NCc2nn(c(c2)C)C)c3ccccc3)(c4ccccc4)c5ccccc5	training set	non-inhibitor
17384932	P(=O)(N{S}C({S}C1{S}C(C1)C(=O)NCc2c3c(cc(c2)F)OCCO3)c4ccccc4)(c5ccccc5)c6ccccc6	training set	inhibitor
17384938	S(=O)(=O)(c1ccc(cc1)CNC(=O){R}C5{R}C({R}C(NP(=O)(c2ccccc2)c3ccccc3)c4ccccc4)C5)C	training set	non-inhibitor
17384940	P(=O)(N{S}C({S}C1{S}C(C1)C(=O)NCc2c3c(ccc2)cccc3)c4ccccc4)(c5ccccc5)c6ccccc6	training set	inhibitor
17384942	O(C(=O){R}C3{R}C({R}C(NC(=O)c1n(nc(c1)C)C)c2ccccc2)C3)C	training set	inhibitor
17384949	O(C(=O){R}C3{R}C({R}C(NC(=O)c1ccccc1)c2ccccc2)C3)C	training set	inhibitor
17384955	S(=O)(=O)(N{S}C({S}C1{S}C(C1)C(=O)OC)c2ccccc2)c3cc4c(cc3)cccc4	training set	inhibitor
17384958	Fc1ccc(cc1)OC(=O)N{S}C({S}C2{S}C(C2)C(=O)OC)c3ccccc3	training set	inhibitor
17384959	Fc1ccc(cc1)OC(=O)N{S}C({S}C2({R}C(C2){R}C(C(=O)Nc3cc4c(cc3)cccc4)C)C)c5ccccc5	training set	non-inhibitor
17384962	S(=O)(=O)(N{S}C({S}C1({R}C(C1){R}C(C(=O)Nc2cc3c(cc2)cccc3)C)C)c4ccccc4)c5cc6c(cc5)cccc6	training set	non-inhibitor
17384964	S(=O)(=O)(N{R}C({R}C1{R}C(C1)C(=O)OC)c2ccccc2)c3ccccc3	training set	inhibitor
17384966	S(=O)(=O)(N{S}C({S}C1({R}C(C1){R}C(C(=O)Nc2cc3c(cc2)cccc3)C)C)c4ccccc4)c5ccccc5	training set	non-inhibitor
17384969	O=C(Nc1cc2c(cc1)cccc2){R}C({S}C3{R}C(C3)({R}C(N)c4ccccc4)C)C	training set	inhibitor
17384975	O=C(Nc1cc2c(cc1)cccc2){R}C({R}C3{S}C(C3)({S}C(NC(=O)c4ccccc4)c5ccccc5)C)C	training set	non-inhibitor
17384977	S(=O)(=O)(N{R}C({R}C1{R}C(C1)C(=O)OC)c2ccccc2)c3ccc(cc3)-c4ccccc4	training set	inhibitor
17384979	O(C(=O){S}C3{S}C({S}C(NC(=O)OCc1ccccc1)c2ccccc2)C3)C	training set	inhibitor
17384983	O=C(Nc1cc2c(cc1)cccc2){R}C({S}C3{R}C(C3)({R}C(NC(=O)c4noc(c4)C)c5ccccc5)C)C	training set	non-inhibitor
17384984	S(=O)(=O)(N{S}C({S}C1{S}C(C1)C(=O)OC)c2ccccc2)c3ccc(cc3)-c4ccccc4	training set	inhibitor
17384992	Clc1c(ccnc1)C(=O)N{R}C({R}C2({S}C(C2){R}C(C(=O)Nc3cc4c(cc3)cccc4)C)C)c5ccccc5	training set	inhibitor
17384995	O=C1N3C(=CC=C1)c2nc4c(cc2C3)cccc4C(C)C	training set	inhibitor
17384998	O(c1ccc(cc1)NC(=O)CCCCC#Cc2ccccc2)C	training set	inhibitor
17385000	S(=O)(=O)(N(CC{R}C5{S}C({S}C(NP(=O)(c1ccccc1)c2ccccc2)C3(CC3)CC(=C)c4ccccc4)C5)C(=O)OCC)c6ccc(cc6)C	training set	non-inhibitor
17385002	O=C1N3C(=CC=C1)c2nc4c(c(c2C3)CC)c(ccc4)C(C)C	training set	inhibitor
17385004	S(c2c1c(c3c(nc1ccc2)COC3)CC)C	training set	inhibitor
17385006	Ic1c(cccc1)CC(=O)Nc2ccccc2	training set	inhibitor
17385009	O=C(N1C(CC2(C1)CC2)c3ccccc3)C	training set	non-inhibitor
17385011	S=C(Nc1c(cccc1)C#Cc2ccccc2)Nc3ccccc3	training set	inhibitor
17385015	S=C(Nc1c(cccc1)C#C[Si](C)(C)C)Nc2ccccc2	training set	inhibitor
17385019	P(=O)(N1{S}C(C3(C{S}C(O)(C1)c2ccccc2)CC3){S}C4{S}C(C4)CCCC)(c5ccccc5)c6ccccc6	training set	non-inhibitor
17385021	[Si](c1c4c(nc2c1cc(c(c2)OC)OC)C3=CC=CC(=O)N3C4)(C(C)(C)C)(C)C	training set	inhibitor
17385023	O(CC(=O)Nc1ccccc1)CC#CCC	training set	inhibitor
17385025	[Si](c1c4c(nc2c1cc(cc2)OC)C3=CC=CC(=O)N3C4)(C(C)(C)C)(C)C	training set	inhibitor
17385026	Clc1cc(ccc1){R}C(NC(=O)c2ccccc2){R}C3({R}C(C3)CCC)CCC	training set	non-inhibitor
17385028	P(=O)(N1CC3(CC(O)(C1)c2ccccc2)CC3)(c4ccccc4)c5ccccc5	training set	non-inhibitor
17385032	[nH]2c1nc4c(c(c1c3c2cccc3)CCCC)cccc4	training set	inhibitor
17385034	Clc1cc(ccc1){R}C(NC(=O)c2ccc(cc2)-c3ccccc3){R}C4({R}C(C4)CCC)CCC	training set	non-inhibitor
17385036	P(=O)(NCC1(CC1)CC(=C)c2ccccc2)(c3ccccc3)c4ccccc4	training set	inhibitor
17385038	[Si](c1c4c(nc2c1cccc2C(C)C)C3=CC=CC(=O)N3C4)(C)(C)C	training set	inhibitor
17385041	O(c2cc1c(c3c(nc1cc2)CCC3)-c4ccccc4)C	training set	inhibitor
17385043	O=C1N3C(=CC=C1)c2nc4c(c(c2C3)C)cccc4	training set	inhibitor
17385046	[Si](c1c4c(nc2c1c(ccc2)C(C)C)C3=CC=CC(=O)N3C4)(C)(C)C	training set	inhibitor
17385048	O=C(Nc1ccccc1)Cc2c(cccc2)C#CCCCC	training set	inhibitor
17385051	P(=O)(NC(C21C(C1)(C2)c3ccc(cc3)C(=O)OC)c4ccccc4)(c5ccccc5)c6ccccc6	training set	inhibitor
17385058	O(C(=O)NC(c1ccccc1)C({E}=CCCC)CCC)CC(C)C	training set	non-inhibitor
17385059	O=C(N{R}C({R}C1{R}C(C1)CCCC)c2ccc(cc2)-c3ccccc3)c4occc4	training set	inhibitor
17385064	O=C(NC(c1ccccc1)C{E}=CCCCC)CCc2ccccc2	training set	inhibitor
17385065	O=C(N{R}C({R}C1({S}C(C1)C2CCCCC2)C)c3ccc(cc3)-c4ccccc4)c5ccccc5	training set	non-inhibitor
17385068	S(=O)(=O)(N{R}C({R}C1({S}C(C1)C2CCCCC2)C)c3ccc(cc3)-c4ccccc4)c6c5ncccc5ccc6	training set	non-inhibitor
17385071	FC(F)(F)c1ccc(cc1)C(NC(=O)c2ccc(cc2)C(F)(F)F)C({E}=CCCC)CCC	training set	non-inhibitor
17385075	FC(F)(F)c1ccc(cc1)CC(=O)N{R}C({R}C2({S}C(C2)C3CCCCC3)C)c4ccc(cc4)-c5ccccc5	training set	non-inhibitor
17385076	Clc1c(cccc1)COC(=O)NC(c2ccccc2)C{E}=CCCCC	training set	inhibitor
17385085	Clc1ccc(cc1){R}C(NC(=O)c2ccccc2){R}C3{R}C(C3)CCCC	training set	inhibitor
17385087	O=C(N{R}C({R}C1{R}C(C1)CCCC)c2ccc(cc2)C(=O)OC)c3ccccc3	training set	inhibitor
17385088	FC(F)(F)c1ccc(cc1)C(=O)NC(c2ccc(cc2)-c3ccccc3)C({E}=CC4CCCCC4)C	training set	non-inhibitor
17385096	O=C(N{R}C({R}C1{R}C(C1)CCCC)c2ccccc2)c3ccccc3	training set	inhibitor
17385098	O=C(N{R}C({R}C1({S}C(C1)C2CCCCC2)C)c3ccc(cc3)C(=O)OC)c4ccccc4	training set	non-inhibitor
17385102	O=C(NC(c1ccc(cc1)C(=O)OC)C({E}=CCCC)CCC)C(C)(C)C	training set	non-inhibitor
17385103	O=C(NC(c1ccccc1)C{E}=CCCCC)c2ccc(cc2)C(=O)OC	training set	inhibitor
17385106	o1c(ccc1)C(=O)N{R}C({R}C2{R}C(C2)CCCC)c3ccccc3	training set	inhibitor
17385111	S(=O)(=O)(NC(c1ccc(cc1)-c2ccccc2)C({E}=CCCC)CCC)c3ccc(cc3)C(F)(F)F	training set	non-inhibitor
17385113	o1c(ccc1)C(=O)NC(c2ccccc2)C{E}=CCCCC	training set	inhibitor
17385118	Clc1ccc(cc1){R}C(NS(=O)(=O)c3c2ncccc2ccc3){R}C4({R}C(C4)CCC)CCC	training set	non-inhibitor
17385120	O(C(=O)NC(c1ccc(cc1)C(=O)OC)C({E}=CCCC)CCC)CC(C)C	training set	inhibitor
17385123	s1c(ccc1)C(=O)NC(c2ccccc2)C{E}=CCCCC	training set	inhibitor
17385126	O=C(N{R}C({R}C1{R}C(C1)CCCC)c2ccc(cc2)-c3ccccc3)Cc4ccccc4	training set	non-inhibitor
17385131	O(C(=O){R}C1(N(C{R}C5{R}C1c2c(n(c(c2)C(=O)N3CCCC3)Cc4ncccc4)C5)C(=O)c6ccccc6)Cc7ccccc7)C	training set	non-inhibitor
17385133	FCCn1c4c(cc1C(=O)N2CCCC2){R}C3{R}C(N(C{R}C3C4)C(=O)c5ccccc5)(C(=O)OC)Cc6ccc(cc6)OC	training set	non-inhibitor
17385135	O(C(=O){R}C1(N(C{R}C4{R}C1c2c(n(c(c2)C(=O)N(C)C)Cc3nn(c(c3)C)C)C4)C(=O)c5ccccc5)Cc6ccc(cc6)OC)C	training set	non-inhibitor
17385137	O(C(=O){R}C1(N(C{R}C5{R}C1c2c(n(c(c2)C(=O)N3CCCC3)Cc4cc(c(cc4)OC)OC)C5)C(=O)c6ccccc6)Cc7ccc(cc7)OC)C	training set	non-inhibitor
17385141	O(C(=O){R}C1(N(C{R}C4{R}C1c2c(n(c(c2)C(=O)N(C)C)Cc3ncccc3)C4)C(=O)c5ccccc5)Cc6ccc(cc6)OC)C	training set	non-inhibitor
17385143	S(CCn1c4c(cc1C(=O)N2CCCC2){R}C3{R}C(N(C{R}C3C4)C(=O)c5ccccc5)(C(=O)OC)Cc6ccccc6)CCO	training set	non-inhibitor
17385145	O(C(=O){R}C1(N(C{R}C5{R}C1c2c(n(c(c2)C(=O)N3CCCC3)Cc4cc(c(cc4)OC)OC)C5)C(=O)c6ccccc6)Cc7ccccc7)C	training set	non-inhibitor
17385147	O(C(=O){R}C1(N(C{R}C4{R}C1c2c(n(c(c2)C(=O)N(C)C)Cc3ncccc3)C4)C(=O)c5ccccc5)Cc6ccccc6)C	training set	non-inhibitor
17385150	S(CCn1c4c(cc1C(=O)N2CCCC2){R}C3{R}C(N(C{R}C3C4)C(=O)c5ccccc5)(C(=O)OC)Cc6ccc(cc6)F)CCO	training set	non-inhibitor
17385152	O(C(=O){R}C1(N(C{R}C6{R}C1c2c(n(c(c2)C(=O)N3CCCC3)Cc4nc5c([nH]4)cccc5)C6)C(=O)c7ccccc7)Cc8ccc(cc8)OC)C	training set	inhibitor
17385154	Fc1ccc(cc1)C{R}C2(N(C{R}C5{R}C2c3c(n(c(c3)C(=O)N4CCCC4)C{S}C(O)CO)C5)C(=O)c6ccccc6)C(=O)OC	training set	non-inhibitor
17385156	S(=O)(=O)(c1ccc(cc1)Cn2c5c(cc2C(=O)N3CCCC3){R}C4{R}C(N(C{R}C4C5)C(=O)c6ccccc6)(C(=O)OC)Cc7ccccc7)C	training set	non-inhibitor
17385160	Brc1sccc1Cn2c5c(cc2C(=O)N3CCCC3){R}C4{R}C(N(C{R}C4C5)C(=O)c6ccccc6)(C(=O)OC)Cc7ccccc7	training set	non-inhibitor
17385163	S(=O)(=O)(c1ccc(cc1)Cn2c5c(cc2C(=O)N3CCCC3){R}C4{R}C(N(C{R}C4C5)C(=O)c6ccccc6)(C(=O)OC)Cc7ccc(cc7)OC)C	training set	non-inhibitor
17385165	Fc1ccc(cc1)C{R}C2(N(C{R}C6{R}C2c3c(n(c(c3)C(=O)N4CCCC4)CCc5ncccc5)C6)C(=O)c7ccccc7)C(=O)OC	training set	non-inhibitor
17385168	O(C(=O){R}C1(N(C{R}C3{R}C1c2c(n(c(c2)C(=O)N(C)C)C)C3)C(=O)c4ccccc4)Cc5ccccc5)C	training set	non-inhibitor
17385170	FCCn1c3c(cc1C(=O)N(C)C){R}C2{R}C(N(C{R}C2C3)C(=O)c4ccccc4)(C(=O)OC)Cc5ccccc5	training set	non-inhibitor
17385174	Fc1c(ccc(c1F)C)Cn2c5c(cc2C(=O)N3CCCC3){R}C4{R}C(N(C{R}C4C5)C(=O)c6ccccc6)(C(=O)OC)Cc7ccc(cc7)OC	training set	non-inhibitor
17385176	O(C(=O){R}C1(N(C{R}C5{R}C1c2c(n(c(c2)C(=O)N3CCCC3)CCN4CCOCC4)C5)C(=O)c6ccccc6)Cc7ccc(cc7)OC)C	training set	non-inhibitor
17385180	O(C(=O){R}C1(N(C{R}C6{R}C1c2c(n(c(c2)C(=O)N3CCCC3)CCc4c5c([nH]c4)ccc(c5)O)C6)C(=O)c7ccccc7)Cc8ccc(cc8)OC)C	training set	non-inhibitor
17385184	O(C(=O){R}C1(N(C{R}C4{R}C1c2c(n(c(c2)C(=O)N3CCCC3)CCOC)C4)C(=O)c5ccccc5)Cc6ccc(cc6)OC)C	training set	non-inhibitor
17385188	O(C(=O){R}C1(N(C{R}C5{R}C1c2c(n(c(c2)C(=O)N(C)C)Cc3nc4c([nH]3)cccc4)C5)C(=O)c6ccccc6)Cc7ccccc7)C	training set	inhibitor
17385189	O(C(=O){R}C1(N(C{R}C5{R}C1c2c(n(c(c2)C(=O)N3CCCC3)Cc4oc(cc4)C)C5)C(=O)c6ccccc6)Cc7ccc(cc7)OC)C	training set	non-inhibitor
17385193	Fc1ccc(cc1)C{R}C2(N(C{R}C7{R}C2c3c(n(c(c3)C(=O)N4CCCC4)CCc5c6c([nH]c5)cc(cc6)F)C7)C(=O)c8ccccc8)C(=O)OC	training set	non-inhibitor
17385195	O(C(=O){R}C1(N(C{R}C4{R}C1c2c(n(c(c2)C(=O)N(C)C)Cc3ccccc3)C4)C(=O)c5ccccc5)Cc6ccc(cc6)OC)C	training set	non-inhibitor
17385197	O(C(=O){R}C1(N(C{R}C3{R}C1c2c(n(c(c2)C(=O)N(C)C)C)C3)C(=O)c4ccccc4)Cc5ccc(cc5)OC)C	training set	non-inhibitor
17385199	FC(F)(F)Oc1ccc(cc1)Cn2c5c(cc2C(=O)N3CCCC3){R}C4{R}C(N(C{R}C4C5)C(=O)c6ccccc6)(C(=O)OC)Cc7ccc(cc7)OC	training set	non-inhibitor
17385201	O(C(=O){R}C1(N(C{R}C4{R}C1c2c(n(c(c2)C(=O)N(C)C)Cc3cc(c(cc3)O)OC)C4)C(=O)c5ccccc5)Cc6ccc(cc6)OC)C	training set	non-inhibitor
17385203	O(C(=O){R}C1(N(CC2=CC(=O){S}C({S}C21)CC(=O)C(=O)N(C)C)C(=O)c3ccccc3)Cc4ccc(cc4)OC)C	training set	non-inhibitor
17385207	Fc1cc(cc(c1F)F)Cn2c4c(cc2C(=O)N(C)C){R}C3{R}C(N(C{R}C3C4)C(=O)c5ccccc5)(C(=O)OC)Cc6ccc(cc6)OC	training set	non-inhibitor
17385209	Fc1ccc(cc1)C{R}C2(N(C{R}C7{R}C2c3c(n(c(c3)C(=O)N4CCCC4)CCc5c6c([nH]c5)cccc6)C7)C(=O)c8ccccc8)C(=O)OC	training set	non-inhibitor
17385211	Fc1ccc(cc1)C{R}C2(N(CC3=CC(=O){S}C({S}C32)CC(=O)C(=O)N(C)C)C(=O)c4ccccc4)C(=O)OC	training set	non-inhibitor
17385214	FC(F)(F)Oc1ccc(cc1)Cn2c5c(cc2C(=O)N3CCCC3)C4C(N(CC4C5)C(=O)c6ccccc6)(C(=O)OC)Cc7ccccc7	training set	non-inhibitor
17385216	Clc1c(cc(cc1)Cn2c4c(cc2C(=O)N(C)C){R}C3{R}C(N(C{R}C3C4)C(=O)c5ccccc5)(C(=O)OC)Cc6ccc(cc6)OC)C(F)(F)F	training set	non-inhibitor
17385218	Clc1c(ccc(c1)C(F)(F)F)NCCCn2c4c(cc2C(=O)N(C)C){R}C3{R}C(N(C{R}C3C4)C(=O)c5ccccc5)(C(=O)OC)Cc6ccc(cc6)F	training set	non-inhibitor
17385221	O(C(=O){R}C1(N(C{R}C4{R}C1c2c(n(c(c2)C(=O)N(C)C)CCc3ncccc3)C4)C(=O)c5ccccc5)Cc6ccc(cc6)OC)C	training set	non-inhibitor
17385227	Brc1cc(ccc1OC)CCn2c4c(cc2C(=O)N(C)C){R}C3{R}C(N(C{R}C3C4)C(=O)c5ccccc5)(C(=O)OC)Cc6ccc(cc6)F	training set	inhibitor
17385228	Fc1cc(c2c(c1)COCO2)Cn3c6c(cc3C(=O)N4CCCC4){R}C5{R}C(N(C{R}C5C6)C(=O)c7ccccc7)(C(=O)OC)Cc8ccc(cc8)OC	training set	non-inhibitor
17385230	Fc1ccc(cc1)C{R}C2(N(C{R}C3{R}C2{S}C(C(=O)C3)CC(=O)C(=O)N(C)C)C(=O)c4ccccc4)C(=O)OC	training set	non-inhibitor
17385233	Brc1sccc1Cn2c5c(cc2C(=O)N3CCCC3){R}C4{R}C(N(C{R}C4C5)C(=O)c6ccccc6)(C(=O)OC)Cc7ccc(cc7)OC	training set	non-inhibitor
17385239	O(C(=O){R}C1(N(C{R}C3{R}C1c2c(n(c(c2)C(=O)N(C)C)CC(=O)OC)C3)C(=O)c4ccccc4)Cc5ccc(cc5)OC)C	training set	non-inhibitor
17385242	O(C(=O){R}C1(N(C{R}C5{R}C1c2c(n(c(c2)C(=O)N3CCCC3)CCc4cc(c(cc4)O)OC)C5)C(=O)c6ccccc6)Cc7ccc(cc7)OC)C	training set	non-inhibitor
17385244	Fc1ccc(cc1)C{R}C2(N(C{R}C6{R}C2c3c(n(c(c3)C(=O)N4CCCC4)Cc5ccc(cc5)OC(F)(F)F)C6)C(=O)c7ccccc7)C(=O)OC	training set	non-inhibitor
17385246	Fc1cc(c2c(c1)COCO2)Cn3c6c(cc3C(=O)N4CCCC4){R}C5{R}C(N(C{R}C5C6)C(=O)c7ccccc7)(C(=O)OC)Cc8ccccc8	training set	non-inhibitor
17385248	S(CCn1c3c(cc1C(=O)N(C)C){R}C2{R}C(N(C{R}C2C3)C(=O)c4ccccc4)(C(=O)OC)Cc5ccc(cc5)OC)CCO	training set	non-inhibitor
17385254	Fc1c(ccc(c1F)C)Cn2c5c(cc2C(=O)N3CCCC3){R}C4{R}C(N(C{R}C4C5)C(=O)c6ccccc6)(C(=O)OC)Cc7ccc(cc7)F	training set	non-inhibitor
17385256	O(C(=O){R}C1(N(CC2=CC(=O){S}C({S}C21)CC(=O)C(=O)N(C)C)C(=O)c3ccccc3)Cc4ccccc4)C	training set	non-inhibitor
17385259	Fc1ccc(cc1)C{R}C2(N(C{R}C5{R}C2c3c(n(c(c3)C(=O)N(C)C)Cc4oc(cc4)C)C5)C(=O)c6ccccc6)C(=O)OC	training set	non-inhibitor
17385270	Fc1ccc(cc1)C{R}C2(N(C{R}C5{R}C2c3c(n(c(c3)C(=O)N(C)C)CCN4CCOCC4)C5)C(=O)c6ccccc6)C(=O)OC	training set	non-inhibitor
17385288	O(C(=O){R}C1(N(CC2=CC(=O)C(=C){R}C21)C(=O)c3ccccc3)Cc4ccc(cc4)OC)C	training set	inhibitor
17385293	Fc1ccc(cc1)C{R}C2(N(C{R}C4{R}C2c3c(n(c(c3)C(=O)N(C)C)CCOC)C4)C(=O)c5ccccc5)C(=O)OC	training set	non-inhibitor
17385302	O5C(OCc1ccc(cc1)OC){R}C4{R}C2{S}C(N(CC3=C2C(C(C({R}C3C)CO)CO)CC4)C(=O)OC(C)(C)C)(C5)C	training set	non-inhibitor
17385307	O=C3C(=C1C(=CC(NC1)(C(=O)OC)Cc2ccccc2)C3C)c4ccccc4	training set	inhibitor
17385316	O(C(=O)C2(NCC1=C(C(=O)C(C1=C2)C)C)CCC)C	training set	non-inhibitor
17385318	O(C(=O)C1(N(CC3C1c2c(n(c(c2)CCC)CCO)C3C)C(=O)c4ccccc4)C)C	training set	non-inhibitor
17385321	Clc1ccc(cc1)C2NC(=O)N(C(=C2C(=O)OCc3ccccc3)C)CCCCCC(=O)O	training set	inhibitor
17385323	O=C2C(=C1C(=CC(NC1)(C(=O)OC)CCC)C2C)C(C)C	training set	non-inhibitor
17385327	FC(F)(F)c1ccc(cc1)C{S}C52N(CC3=C(C(=O)C(=C(C)C){R}C32)c4ccccc4)C(=O)N(C5=O)CCc6ccccc6	training set	non-inhibitor
17385331	FC(F)(F)c1c(ccc(c1)F)COC3OC{S}C2(N(CC5=C4{R}C2{R}C3CCC4C6C({R}C5CC)COC(=O)OC6)C(=O)OC(C)(C)C)C	training set	non-inhibitor
17385332	O=C1N(C(=O)N4{S}C1({R}C2C(=C(C(=O)C2=C(C)C)c3ccccc3)C4)C)CCc5ccccc5	training set	inhibitor
17385336	FC(F)(F)c1c(ccc(c1)F)COC3OC{S}C2(N(CC5=C4{R}C2{R}C3CCC4C(C({R}C5CC)COC)COC)C(=O)OC(C)(C)C)C	training set	non-inhibitor
17385661	S(=O)(=O)(n2c1ncccc1cc2)c3ccccc3	training set	non-inhibitor
17385723	S(=O)(=O)(NC(=O)C)c1ccc(cc1)NC(=S)NC(=O)CC	training set	non-inhibitor
17385732	S(=O)(=O)(NC1CCCCC1)c2ccc(cc2)CCC(=O)Nc3ccc(cc3)C	training set	inhibitor
17385806	S3C({E}=Cc1n(ccc1)-c2cc(ccc2)C(=O)O)C(=O)N(C3=O)Cc4c(cccc4)C#N	training set	non-inhibitor
17385810	Clc1ccc(cc1)Sc2c(cncc2)S(=O)(=O)NC(=O)NCCCC	training set	non-inhibitor
17385813	Clc1ccc(cc1)-c2nc(sc2)C({Z}=C(O)CN3CCCCC3)C#N	training set	inhibitor
17385993	Brc1ccc(cc1)C(NC(=O)C=C)NC(=O)C=C	training set	non-inhibitor
17386006	S(=O)(=O)(N)c1cc(c(cc1)OC)C(=O)NCCCN3CCN(c2ccc(cc2)C)CC3	training set	non-inhibitor
17386055	S(c1c(cccc1)CC(NC)C)c2ccc(cc2)O	training set	non-inhibitor
17386056	s1c(c(c(c1)-c2ccc(cc2)C)C(=O)OCC)NC(=O)C3C(C(=O)O)CC=CC3	training set	inhibitor
17386135	S(=O)(=O)(N(Cc1c(cccc1)F)CC(=O)NCCC2=CCCCC2)c3ccc(cc3)C	training set	non-inhibitor
17386560	s1c(c(c(c1C)-c2ccc(cc2)C)C(=O)OC(C)C)NC(=O)C3C(C4OC3CC4)C(=O)O	training set	non-inhibitor
17386594	s1c(c(c(c1C)-c2ccc(cc2)C)C(=O)OCC)NC(=O)C3C(C4OC3CC4)C(=O)O	training set	non-inhibitor
17386655	BrC1=CC(=C(O)C({Z}=NCC)C=C1)C(=O)C{E}=Cc2cc3c(cc2)OCO3	training set	inhibitor
17386992	Fc1c(cccc1)C(C2C(=O)CC(CC2=O)(C)C)C3C(=O)CC(CC3=O)(C)C	training set	non-inhibitor
17387443	Clc1cc(c(c(c1)OC)OCC(=O)OCC)C3N(C(=O)c2c(cccc2)N3)c4cc(ccc4)C	training set	non-inhibitor
17387448	S2C({E}=Nc1ccc(cc1)OC)N(C(=O)C2{Z}=Cc3sc(cc3)C)CC(C)C	training set	non-inhibitor
17387450	o1c(ccc1[N+](=O)[O-])C(=O)Nc2nc(ccc2)C	training set	inhibitor
17387460	O=C(N(NC(=O)c1ccccc1)C(C)(C)C)c2cc(ccc2)C(=O)N(NC(=O)c3ccccc3)C(C)(C)C	training set	non-inhibitor
17387466	Clc1c(ccc(c1)Cl)OCCCC(=O)NNC(=O)CCC(=O)OC	training set	inhibitor
17387470	S4C(N(c1cc(ccc1)C(=O)NC3(C(=O)Nc2ccc(cc2)C)CCCCC3)C(=O)C4)c5ccccc5	training set	non-inhibitor
17387490	Clc1ccc(cc1)-n2nc3c(c2C)c(nnc3OCC)C	training set	inhibitor
17387491	S(C(N=Nc1ccccc1)(C(=O)Nc2ccccc2)C(=O)C)c3n(c(nn3)-c4ccccc4)-c5ccccc5	training set	non-inhibitor
17387498	S4C({E}=Cc1oc(cc1)Sc2nc3c([nH]2)cccc3)C(=O)N(C4=O)C(CC)C	training set	inhibitor
17387500	Clc1c(ccc(c1)F)CN3CCC(C(=O)NN{E}=Cc2oc(cc2)C)CC3	training set	non-inhibitor
17387503	O2c1c(cccc1)C({E}=NC(C)C)C(=C2O)NC(=O)C	training set	non-inhibitor
17387515	s1c(ccc1C)-c2nc4c(c(c2)C(=O)NCc3occc3)cccc4	training set	inhibitor
17387522	FC(F)(F)C(NC(=O)c1c(cccc1)F)(NNc2ccccc2)C(=O)OC	training set	non-inhibitor
17387530	Clc1cc(c(c(c1)OC)OCC(=O)OCC)C3N(C(=O)c2c(cccc2)N3)c4ccc(cc4)F	training set	non-inhibitor
17387533	O3c1c(ccc(c1)C(=O)NC(C(=O)NN{Z}=Cc2occc2)C(C)C)OC3	training set	inhibitor
[truncated: 13,373 more rows]
