# Supplementary material for: An improved large-scale prediction model of CYP1A2 inhibitors by using combined fragment descriptors
Source: Royal Society of Chemistry journal article supplement (doi:10.1039/c5ra17196b), 2015-01-01
Supplement: c5ra17196b2.pdf [file c5ra17196b2.pdf]

**Table S2** 25 molecular descriptors used for principal component analysis (PCA)

| No. | Name     | Description                                                          |
|-----|----------|----------------------------------------------------------------------|
| 1   | MW       | molecular weight                                                     |
| 2   | AMW      | average molecular weight                                             |
| 3   | Sv       | sum of atomic van der Waals volumes (scaled on Carbon atom)          |
| 4   | Mv       | mean atomic van der Waals volume (scaled on Carbon atom)             |
| 5   | Se       | sum of atomic Sanderson electronegativities (scaled on Carbon atom)  |
| 6   | Sp       | sum of atomic polarizabilities (scaled on Carbon atom)               |
| 7   | Me       | mean atomic Sanderson electronegativity (scaled on Carbon atom)      |
| 8   | Mp       | mean atomic polarizability (scaled on Carbon atom)                   |
| 9   | a_hyd    | number of hydrophobic atoms                                          |
| 10  | MLOGP    | Moriguchi octanolwater partition coefficient                         |
| 11  | mlogpCX  | Moriguchi based lipophilicity descriptor (carbon and halogen atoms)  |
| 12  | mlogpON  | Moriguchi based lipophilicity descriptor (nitrogen and oxygen atoms) |
| 13  | mlogpPRX | Moriguchi based lipophilicity descriptor (proximity effect)          |
| 14  | mlogpUB  | Moriguchi based lipophilicity descriptor (unsaturated bonds)         |
| 15  | mlogpHB  | Moriguchi based lipophilicity descriptor (intramolecular H bonds)    |
| 16  | mlogpPOL | Moriguchi based lipophilicity descriptor (Polar substituents)        |
| 17  | mlogpAMP | Moriguchi based lipophilicity descriptor (amphotericity)             |
| 18  | mlogpALK | Moriguchi based lipophilicity descriptor (alkanes and alkenes)       |
| 19  | mlogpRNG | Moriguchi based lipophilicity descriptor (ring structures)           |
| 20  | mlogpQN  | Moriguchi based lipophilicity descriptor (quarternary nitrogen)      |
| 21  | mlogpNO2 | Moriguchi based lipophilicity descriptor (Nitro groups)              |
| 22  | mlogpNCS | Moriguchi based lipophilicity descriptor (NCS )                      |
| 23  | mlogpBLM | Moriguchi based lipophilicity descriptor (beta lactam)               |
| 24  | nHDon    | number of hydrogen-bond donors                                       |
| 25  | nHAcc    | number of hydrogen-bond acceptors                                    |
